# Supplementary material for: Endopiriform neurons projecting to ventral CA1 are a critical node for recognition memory
Source: eLife. 2025 Jan 21;13:RP99642. doi: 10.7554/eLife.99642 (PMC11750136; doi:10.7554/eLife.99642)
Supplement: Figure 1—source data 2. [file elife-99642-fig1-data2.xlsx]

## Sheet: histgram
histgram AP
	-5000	-4500	-4000	-3500	-3000	-2500	-2000	-1500	-1000	-500	0	500	1000	1500	2000	2500	3000	3500	4000	4500		total number
AT286	0	0	0	0	0	2	32	67	75	28	39	65	61	29	6	0	0	0	0	0		404
AT287	0	0	5	36	35	18	43	47	43	10	23	24	18	6	1	0	0	0	0	0		309
AT288	0	0	0	20	21	43	59	57	38	45	63	32	30	8	6	0	0	0	0	0		422
AT422	0	0	0	0	9	41	34	36	36	27	24	18	15	17	0	0	0	0	0	0		257
AT425	0	0	0	0	79	31	24	20	22	17	41	39	21	22	6	1	0	0	0	0		323
	normalized by total number
	-4500	-4000	-3500	-3000	-2500	-2000	-1500	-1000	-500	0	500	1000	1500	2000	2500	3000	3500
AT286	0	0	0	0	0.0049505	0.0792079	0.165842	0.185644	0.0693069	0.0965347	0.160891	0.15099	0.0717822	0.0148515	0	0	0
AT287	0	0.0161812	0.116505	0.113269	0.0582524	0.139159	0.152104	0.139159	0.0323625	0.0744337	0.0776699	0.0582524	0.0194175	0.00323625	0	0	0
AT288	0	0	0.0473934	0.049763	0.101896	0.13981	0.135071	0.0900474	0.106635	0.149289	0.0758294	0.07109	0.0189573	0.014218	0	0	0
AT422	0	0	0	0	0.0350195	0.159533	0.132296	0.140078	0.140078	0.105058	0.0933852	0.0700389	0.0583658	0.0661479	0	0	0
AT425	0	0	0	0	0.244582	0.0959752	0.0743034	0.0619195	0.0681115	0.0526316	0.126935	0.120743	0.0650155	0.0681115	0.0185759	0.00309598	0
	0	0	0	0	0.0582524	0.139159	0.135071	0.139159	0.0693069	0.0965347	0.0933852	0.07109	0.0583658	0.0148515	0	0	0
histgram DV
	-7500	-7400	-7300	-7200	-7100	-7000	-6900	-6800	-6700	-6600	-6500	-6400	-6300	-6200	-6100	-6000	-5900	-5800	-5700	-5600	-5500	-5400	-5300	-5200	-5100	-5000	-4900	-4800	-4700	-4600	-4500	-4400	-4300	-4200	-4100	-4000	-3900	-3800	-3700	-3600	-3500	-3400	-3300	-3200	-3100	-3000	-2900	-2800	-2700
AT286	0	0	0	0	0	0	0	0	0	3	2	0	0	0	4	7	7	17	26	44	52	69	59	53	33	17	8	0	1	0	1	0	0	0	0	0	0	1	0	0	0	0	0	0	0	0	0	0	0
AT287	0	0	0	0	0	1	3	3	7	7	12	7	6	7	9	12	20	24	32	30	45	31	27	14	8	2	1	1	0	0	0	0	0	0	0	0	0	0	0	0	0	0	0	0	0	0	0	0	0
AT288	0	0	0	0	0	1	3	4	4	3	6	5	3	5	15	20	37	46	43	45	53	48	31	25	13	10	1	1	0	0	0	0	0	0	0	0	0	0	0	0	0	0	0	0	0	0	0	0	0
AT422	0	0	0	0	0	1	2	2	6	6	8	6	3	6	1	5	7	13	20	36	34	37	24	21	9	5	4	1	0	0	0	0	0	0	0	0	0	0	0	0	0	0	0	0	0	0	0	0	0
AT425	0	0	0	0	0	2	4	4	7	2	3	6	11	8	11	8	19	14	15	14	30	41	47	34	23	12	6	0	0	1	0	0	1	0	0	0	0	0	0	0	0	0	0	0	0	0	0	0	0
	normalized by total number
	-7500	-7400	-7300	-7200	-7100	-7000	-6900	-6800	-6700	-6600	-6500	-6400	-6300	-6200	-6100	-6000	-5900	-5800	-5700	-5600	-5500	-5400	-5300	-5200	-5100	-5000	-4900	-4800	-4700	-4600	-4500	-4400	-4300	-4200	-4100	-4000	-3900	-3800	-3700	-3600	-3500	-3400	-3300	-3200	-3100	-3000	-2900	-2800	-2700
AT286	0	0	0	0	0	0	0	0	0	0.00742574	0.0049505	0	0	0	0.00990099	0.0173267	0.0173267	0.0420792	0.0643564	0.108911	0.128713	0.170792	0.14604	0.131188	0.0816832	0.0420792	0.019802	0	0.00247525	0	0.00247525	0	0	0	0	0	0	0.00247525	0	0	0	0	0	0	0	0	0	0	0
AT287	0	0	0	0	0	0.00323625	0.00970874	0.00970874	0.0226537	0.0226537	0.038835	0.0226537	0.0194175	0.0226537	0.0291262	0.038835	0.0647249	0.0776699	0.10356	0.0970874	0.145631	0.100324	0.0873786	0.0453074	0.02589	0.00647249	0.00323625	0.00323625	0	0	0	0	0	0	0	0	0	0	0	0	0	0	0	0	0	0	0	0	0
AT288	0	0	0	0	0	0.00236967	0.007109	0.00947867	0.00947867	0.007109	0.014218	0.0118483	0.007109	0.0118483	0.035545	0.0473934	0.0876777	0.109005	0.101896	0.106635	0.125592	0.113744	0.0734597	0.0592417	0.0308057	0.0236967	0.00236967	0.00236967	0	0	0	0	0	0	0	0	0	0	0	0	0	0	0	0	0	0	0	0	0
AT422	0	0	0	0	0	0.00389105	0.0077821	0.0077821	0.0233463	0.0233463	0.0311284	0.0233463	0.0116732	0.0233463	0.00389105	0.0194553	0.0272374	0.0505837	0.077821	0.140078	0.132296	0.143969	0.0933852	0.0817121	0.0350195	0.0194553	0.0155642	0.00389105	0	0	0	0	0	0	0	0	0	0	0	0	0	0	0	0	0	0	0	0	0
AT425	0	0	0	0	0	0.00619195	0.0123839	0.0123839	0.0216718	0.00619195	0.00928793	0.0185759	0.0340557	0.0247678	0.0340557	0.0247678	0.0588235	0.0433437	0.0464396	0.0433437	0.0928793	0.126935	0.145511	0.105263	0.0712074	0.0371517	0.0185759	0	0	0.00309598	0	0	0.00309598	0	0	0	0	0	0	0	0	0	0	0	0	0	0	0	0
	0	0	0	0	0	0.00323625	0.0077821	0.00947867	0.0216718	0.00742574	0.014218	0.0185759	0.0116732	0.0226537	0.0291262	0.0247678	0.0588235	0.0505837	0.077821	0.106635	0.128713	0.126935	0.0933852	0.0817121	0.0350195	0.0236967	0.0155642	0.00236967	0	0	0	0	0	0	0	0	0	0	0	0	0	0	0	0	0	0	0	0	0
[truncated: 28 more columns]
