# Supplementary material for: Endopiriform neurons projecting to ventral CA1 are a critical node for recognition memory
Source: eLife. 2025 Jan 21;13:RP99642. doi: 10.7554/eLife.99642 (PMC11750136; doi:10.7554/eLife.99642)
Supplement: Figure 2—source data 1. [file elife-99642-fig2-data1.xlsx]

## Sheet: Data
Data collected
Date	Mouse ID	Mouse Number	Injection sites	section nr	Zoom	GFP/redbeads	CTB647	Double-stained	vHP	Other IS		Average											% double/vHP
20220926	AT144	#563	vHP+MC	1	10x	1	2	0	2	1		Mouse ID	Mouse Number	Injection site	vHP	Other IS	Doublestained	# of vHP	# of double	% double/vHP			PFC	ACC	MC	dmENT
20220926	AT144	#563	vHP+MC	2	10x	5	1	0	1	5		AT144	#563	vHP+MC	2.25	3	0	9	0	0			39.5833	0	0	2.5
20220926	AT144	#563	vHP+MC	3	10x	1	3	0	3	1		AT168	#788	vHP+ACC	6.25	9.5	0	25	0	0			50	6.25	0	0
20220926	AT144	#563	vHP+MC	4	10x	5	3	0	3	5		AT174	#827	vHP+mdEnt	10	9.75	0.25	40	1	2.5			17.6471	18.75	5.55556	0
20220926	AT168	#788	vHP+ACC	1	10x	11	8	0	8	11		AT226	#1087	vHP+M1	2.5	13	0	5	0	0			9.21053	2.43902		2.4
20220926	AT168	#788	vHP+ACC	2	10x	6	5	0	5	6		AT228	#1089	vHP+mdEnt	11.25	14	0	45	0	0				4.54545
20220926	AT168	#788	vHP+ACC	3	10x	10	5	0	5	10		NY228	#1537	vHP+PL	12	14.25	4.75	48	19	39.5833		median	28.6152	4.54545	0	1.2
20220926	AT168	#788	vHP+ACC	4	10x	11	7	0	7	11	*	NY229	#1536	vHP+ACC	16	17.5	1	64	4	6.25
20220926	AT174	#827	vHP+mdEnt	1	10x	7	10	0	10	7		NY231	#1538	vHP+PL	5	13.5	2.5	20	10	50			Ranksum test	PFC vs ACC p = 0.0635
20220926	AT174	#827	vHP+mdEnt	2	10x	18	20	1	20	18	*	NY233	#1539	vHP+ACC	4	20.75	0.75	16	3	18.75				PFC vs MC p = 0.0571
20220926	AT174	#827	vHP+mdEnt	3	10x	8	3	0	3	8		NY232	#1541	vHP+PL	4.25	26	0.75	17	3	17.6471				PFC vs dmENT p = 0.0286
20220926	AT174	#827	vHP+mdEnt	4	10x	6	7	0	7	6		NY248	#1686	vHP+PFC	19	22.5	1.75	76	7	9.21053
												NY249	#1685	vHP+ACC	10.25	9.75	0.25	41	1	2.43902
20220905	AT226	#1087	vHP+M1	2	10x	16	3	0	3	16		NY251	#1711	vHP+ACC	5.5	15	0.25	22	1	4.54545
20220905	AT226	#1087	vHP+M1	3	10x	10	2	0	2	10		NY254	#1691	vHP+MC	4.5	14.25	0.25	18	1	5.55556
20220905	AT228	#1089	vHP+mdEnt	1	10x	6	12	0	12	6		AT369	#2521	vHP+MdENT	10	20.4	0	50	0	0
20220905	AT228	#1089	vHP+mdEnt	2	10x	11	13	0	13	11		AT372	#2518	vHP+MdENT	16.4	27.8	0.4	82	2	2.43902
20220905	AT228	#1089	vHP+mdEnt	3	10x	17	8	0	8	17
20220905	AT228	#1089	vHP+mdEnt	4	10x	22	12	0	12	22
20221017	NY228	#1534	vHP+PL	1	10x	25	7	5	7	25
20221017	NY228	#1534	vHP+PL	2	10x	12	18	2	18	12												One way ANOVA table
20221017	NY228	#1534	vHP+PL	3	10x	7	10	3	10	7												'1'	'2'	1.8832	22.7133	43.5435	0.0313584
20221017	NY228	#1534	vHP+PL	4	10x	13	13	9	13	13												'1'	'3'	3.54222	27.2584	50.9745	0.0230834
20221017	NY229	#1536	vHP+ACC	1	10x	22	9	1	9	22		Injection site	Number of experiments	Added data	animla number	slice number						'1'	'4'	5.92834	27.8852	49.8421	0.0123247
20221017	NY229	#1536	vHP+ACC	2	10x	18	19	1	19	18		MC	2	1	3	10						'2'	'3'	-18.1319	4.54504	27.222	0.931644
20221017	NY229	#1536	vHP+ACC	3	10x	20	18	0	18	20		ACC	3	2	5	20						'2'	'4'	-15.6582	5.1719	26.002	0.880293
20221017	NY229	#1536	vHP+ACC	4	10x	10	18	2	18	10		PL(+PFC)	2	2	4	16						'3'	'4'	-23.0893	0.626852	24.343	0.999816
												mdEnt	2	2	4	18
20221026	NY231	#1538	vHP+PL	1	10x	17	9	4	9	17
20221026	NY231	#1538	vHP+PL	2	10x	16	2	0	2	16
20221026	NY231	#1538	vHP+PL	3	10x	13	3	2	3	13
20221026	NY231	#1538	vHP+PL	4	10x	8	6	4	6	8
20221026	NY233	#1539	vHP+ACC	1	10x	4	28	0	4	28
20221026	NY233	#1539	vHP+ACC	2	10x	3	28	0	3	28
20221026	NY233	#1539	vHP+ACC	3	10x	4	15	2	4	15
20221026	NY233	#1539	vHP+ACC	4	10x	5	12	1	5	12												1	2	-3.53042	5.4	14.3304	0.405556
																						1	3	1.46958	10.4	19.3304	0.0147313
*uncertain doublestains were not included																						1	4	0.0865156	9.5	18.9135	0.0469474
Date	Mouse ID	Mouse Number	Injection sites	section nr	Zoom	GFP/redbeads	CTB647	Double-stained	vHP	Other IS												2	3	-3.41968	5	13.4197	0.422046
20230119	NY232	1541	vHP+PL		10x	1	8	2	1	8	vHP: redbeads											2	4	-4.83042	4.1	13.0304	0.639864
20230119	NY232	1541	vHP+PL		10x	4	27	0	4	27	PL: CTB647											3	4	-9.83042	-0.9	8.03042	0.993921
20230119	NY232	1541	vHP+PL		10x	4	47	0	4	47
20230119	NY232	1541	vHP+PL		10x	8	22	1	8	22
20230119	NY248	1686	vHP+PFC		10x	31	20	1	20	31	vHP:CTb647
20230119	NY248	1686	vHP+PFC		10x	28	29	5	29	28	PFC:redbeads
20230119	NY248	1686	vHP+PFC		10x	16	12	0	12	16
20230119	NY248	1686	vHP+PFC		10x	15	15	1	15	15
20230119	NY249	1685	vHP+ACC		10x	3	9	1	9	3	vHP:CTB647
20230119	NY249	1685	vHP+ACC		10x	8	8	0	8	8	ACC:redbeads
20230119	NY249	1685	vHP+ACC		10x	11	12	0	12	11
20230119	NY249	1685	vHP+ACC		10x	17	12	0	12	17
20230119	NY251	1711	vHP+ACC		10x	4	15	0	4	15	vHP:redbeads
20230119	NY251	1711	vHP+ACC		10x	7	11	1	7	11	ACC:CTB647
20230119	NY251	1711	vHP+ACC		10x	6	20	0	6	20
20230119	NY251	1711	vHP+ACC		10x	5	14	0	5	14
20230119	NY254	1691	vHP+MC		10x	4	19	1	4	19	vHP:redbeads
20230119	NY254	1691	vHP+MC		10x	4	6	0	4	6	MC:CTB647
20230119	NY254	1691	vHP+MC		10x	3	18	0	3	18
20230119	NY254	1691	vHP+MC		10x	7	14	0	7	14
Date	Mouse ID	Mouse Number	Injection sites	section nr	Zoom	GFP/redbeads	CTB647	Double-stained	vHP	Other IS
20230705	AT369	2521	vHP+mENT	1	20x	29	19	0	19	29	vHP:CTB647
20230705	AT369	2521	vHP+mENT	2	20x	22	9	0	9	22	mdENT:GFP
20230705	AT369	2521	vHP+mENT	3	20x	21	8	0	8	21
20230705	AT369	2521	vHP+mENT	4	20x	22	5	0	5	22
20230705	AT369	2521	vHP+mENT	5	20x	8	9	0	9	8
20230705	AT372	2518	vHP+mENT	1	20x	4	3	0	3	4	vHP:CTB647
20230705	AT372	2518	vHP+mENT	2	20x	22	15	0	15	22	mdENT:GFP
20230705	AT372	2518	vHP+mENT	3	20x	15	15	0	15	15
20230710	AT372	2518	vHP+mENT	4	20x	54	23	1	23	54
20230710	AT372	2518	vHP+mENT	5	20X	44	26	1	26	44
