# Supplementary material for: Endopiriform neurons projecting to ventral CA1 are a critical node for recognition memory
Source: eLife. 2025 Jan 21;13:RP99642. doi: 10.7554/eLife.99642 (PMC11750136; doi:10.7554/eLife.99642)
Supplement: Figure 3—source data 1. [file elife-99642-fig3-data1.xlsx]

## Sheet: analysis
ventral CA1
distal	AT165_s6	AT165_s5	AT206_s2_g3	AT206_s1_g12	AT207_s1_g11	AT207_s2_g2	AT208_s1_g11	AT208_s2_g2		proximal	AT165_s6	AT165_s5	AT206_s2_g3	AT206_s1_g12	AT207_s1_g11	AT207_s2_g2	AT208_s1_g11	AT208_s2_g2
0	0.710911	0.290516	0.38256	0.311188	0.422082	0.35018	0.456221	0.416167		0	0.197918	0.192445	0.186593	0.372881	0.355382	0.213238	0.453941	0.267542
10	0.622893	0.409407	0.358091	0.410114	0.529713	0.424292	0.628948	0.539816		10	0.237292	0.131558	0.258	0.304861	0.369888	0.364777	0.407999	0.388911
20	0.631979	0.492338	0.337433	0.486673	0.603657	0.445789	0.530942	0.455801		20	0.294335	0.101876	0.239291	0.271304	0.378236	0.312831	0.423032	0.364321
30	0.756288	0.500568	0.250051	0.381092	0.717179	0.453806	0.497052	0.508344		30	0.288729	0.125129	0.233744	0.365782	0.35688	0.349285	0.353873	0.329979
40	0.857758	0.549615	0.16838	0.367063	0.488808	0.503713	0.461117	0.447917		40	0.326224	0.155766	0.176231	0.332358	0.203905	0.438196	0.380288	0.277915
50	0.520767	0.534244	0.196235	0.387618	0.498554	0.411239	0.639481	0.493037		50	0.270934	0.22102	0.177724	0.323896	0.284753	0.309569	0.431572	0.337184
60	0.503373	0.566725	0.185667	0.421601	0.498643	0.35768	0.823386	0.567675		60	0.43948	0.234235	0.271119	0.40358	0.341532	0.294256	0.471012	0.305276
70	0.522229	0.791484	0.157415	0.562173	0.444242	0.437719	0.623788	0.463932		70	0.356846	0.217403	0.261362	0.277165	0.348326	0.28375	0.370561	0.289081
80	0.611689	0.658646	0.265126	0.861129	0.418101	0.442727	0.592867	0.762295		80	0.30223	0.190261	0.256321	0.312954	0.277683	0.268285	0.372774	0.336919
90	0.523034	0.677586	0.244975	0.77141	0.483615	0.604321	0.643942	0.633089		90	0.284687	0.198389	0.281552	0.278462	0.285779	0.23194	0.431627	0.293619
100	0.520877	0.579959	0.247478	0.714939	0.308731	0.513683	0.710253	0.605847		100	0.297434	0.252154	0.287992	0.253727	0.291751	0.210071	0.410819	0.371365
110	0.488412	0.554266	0.503199	0.629898	0.367141	0.644154	0.696388	0.643246		110	0.265006	0.29159	0.276947	0.357051	0.335792	0.213701	0.310618	0.370454
120	0.493204	0.749701	0.345409	0.543544	0.488889	0.362269	0.55792	0.51783		120	0.275287	0.26311	0.307837	0.218456	0.372097	0.296979	0.344547	0.30559
130	0.510973	0.740871	0.182	0.529474	0.584514	0.335716	0.448784	0.523662		130	0.331016	0.228011	0.333502	0.243337	0.414096	0.261222	0.377683	0.232638
140	0.438239	0.618441	0.165944	0.476265	0.671116	0.270376	0.467591	0.680662		140	0.313381	0.220311	0.3268	0.227563	0.446551	0.226531	0.369945	0.149023
150	0.52526	0.672933	0.151548	0.566187	0.395721	0.371986	0.489614	0.717327		150	0.33347	0.176413	0.316793	0.218208	0.362091	0.249046	0.307526	0.268765
160	0.48175	0.724547	0.163156	0.411752	0.368648	0.321181	0.597039	0.780088		160	0.29427	0.226371	0.365053	0.244464	0.32989	0.26347	0.255543	0.259877
170	0.533254	0.652793	0.259378	0.383095	0.433405	0.293278	0.518436	0.684064		170	0.340976	0.292161	0.252593	0.345843	0.367299	0.323366	0.300518	0.266794
180	0.511539	0.666162	0.259013	0.473187	0.469717	0.329656	0.469736	0.651927		180	0.346633	0.303098	0.261012	0.21469	0.446026	0.313921	0.240559	0.200104
190	0.441837	0.757985	0.308356	0.376387	0.312089	0.286384	0.502722	0.744382		190	0.373087	0.29766	0.216136	0.135007	0.36893	0.264402	0.220162	0.20805
200	0.449123	0.82729	0.246624	0.514558	0.336579	0.228982	0.455662	0.735132		200	0.346703	0.270498	0.157462	0.162116	0.325449	0.28681	0.231623	0.188434
area under the curve	11.6554	13.0161	5.37804	10.5793	9.84114	8.38913	11.8119	12.5722	11.1174		6.51594	4.58946	5.44406	5.8637	7.26233	5.97565	7.46622	6.01184	5.99374	signrank test P =0.0156
																				Mann-U test P =0.007
intermediate CA1
distal	AT165_s15	AT165_s13	AT206_s2_g11	AT206_s2_g12	AT207_s2_g11	AT207_s2_g12	AT207_s2_g11	AT207_s2_g13		proximal	AT165_s15	AT165_s13	AT206_s2_g11	AT206_s2_g12	AT207_s2_g11	AT207_s2_g12	AT207_s2_g11	AT207_s2_g13
0	0.31716	0.321278	0.281403	0.364002	0.308094	0.197484	0.611782	0.369984		0	0.24324	0.207591	0.258428	0.320416	0.263671	0.109607	0.435844	0.435159
10	0.299724	0.30651	0.340642	0.471936	0.396677	0.462373	0.56415	0.341553		10	0.257867	0.230366	0.286741	0.322126	0.237477	0.178303	0.446224	0.47468
20	0.3246	0.343183	0.337933	0.367308	0.496599	0.416484	0.417475	0.353402		20	0.292718	0.243274	0.268685	0.29822	0.151899	0.136643	0.404863	0.451582
30	0.34596	0.436011	0.287598	0.36135	0.446382	0.432438	0.406477	0.349942		30	0.298977	0.209581	0.245294	0.281984	0.156692	0.0973028	0.392356	0.406875
40	0.308615	0.37485	0.278056	0.426667	0.418575	0.394892	0.443413	0.404626		40	0.289341	0.211642	0.224361	0.288128	0.202776	0.168458	0.430374	0.38865
50	0.295904	0.315638	0.327234	0.36554	0.261637	0.375114	0.491409	0.410789		50	0.263846	0.174485	0.242791	0.267548	0.236322	0.114886	0.374263	0.386896
60	0.254413	0.308541	0.283829	0.323799	0.411913	0.434158	0.561549	0.346022		60	0.257312	0.175563	0.207269	0.25842	0.459862	0.160011	0.368236	0.355381
70	0.274186	0.281229	0.279422	0.258396	0.264223	0.376876	0.496567	0.390317		70	0.290672	0.149012	0.232079	0.246273	0.231892	0.17635	0.365531	0.333665
80	0.259234	0.278967	0.37349	0.350319	0.12216	0.434573	0.412482	0.454593		80	0.278	0.102801	0.219084	0.269432	0.188041	0.164082	0.423159	0.306255
90	0.265457	0.279702	0.272142	0.467417	0.271177	0.353385	0.492463	0.551643		90	0.231168	0.0934429	0.220152	0.251131	0.227807	0.174671	0.402815	0.34115
100	0.227434	0.296688	0.303694	0.31439	0.397777	0.35897	0.616733	0.600287		100	0.207026	0.0522454	0.207918	0.269223	0.205193	0.160684	0.353127	0.377424
110	0.219058	0.298796	0.349785	0.317043	0.498227	0.668677	0.515869	0.351325		110	0.158011	0.0464102	0.193008	0.264699	0.196245	0.15144	0.337279	0.360457
120	0.17071	0.375094	0.573691	0.289213	0.386367	0.648807	0.48432	0.337906		120	0.0901012	0.0332224	0.183693	0.236934	0.173564	0.135373	0.301631	0.332389
130	0.148041	0.306743	0.557833	0.305015	0.45471	0.460281	0.465173	0.330124		130	0.0638333	0.0119023	0.229436	0.204452	0.196598	0.150412	0.295133	0.304499
140	0.104966	0.259966	0.822316	0.387737	0.668676	0.504829	0.466449	0.406003		140	0.0712283	0.0139341	0.210558	0.266407	0.15012	0.152521	0.270334	0.269885
150	0.0703758	0.169697	0.495765	0.42284	0.795483	0.541282	0.626438	0.330044		150	0.0882912	0.0335202	0.178207	0.18289	0.1791	0.218651	0.236224	0.278642
area under the curve	3.88584	4.95289	6.16483	5.79297	6.59868	7.06062	8.07275	6.32856	6.2467		3.38163	1.98899	3.6077	4.22828	3.45726	2.4494	5.83739	5.80359	3.53248	signrank test P =0.0078
																				Mann-U test P =0.007
dorsal CA1
distal	AT165_s20	AT165_s21	165	AT206_s3_g6	AT207_s3_g4	AT207_s3_g7	AT208_s3_g3	16		proximal	AT165_s20	AT165_s21	AT206_s3_g5	AT206_s3_g6	AT207_s3_g4	AT207_s3_g7	AT208_s3_g3	AT208_s3_g4
0	0.254167	0.33752	0.214051	0.0545842	0.216202	0.2754	0.447184	0.277987		0	0.465425	0.249615	0.169507	0.157265	0.0924701	0.258196	0.3263	0.214089
10	0.281216	0.396567	0.218546	0.0925333	0.260394	0.270071	0.419983	0.25137		10	0.458927	0.264274	0.18946	0.156902	0.297467	0.287407	0.293519	0.216402
20	0.320702	0.295275	0.209058	0.125213	0.348508	0.382975	0.390859	0.250354		20	0.396505	0.306442	0.196166	0.175977	0.255924	0.23613	0.281239	0.267299
30	0.328701	0.232716	0.1954	0.119864	0.331633	0.398301	0.423065	0.274224		30	0.431041	0.278275	0.195123	0.153376	0.204599	0.184524	0.303286	0.213059
40	0.352319	0.215494	0.1795	0.122265	0.306507	0.481462	0.390465	0.257366		40	0.382866	0.272117	0.219614	0.150726	0.238254	0.22523	0.380216	0.253097
50	0.291113	0.192447	0.210117	0.0956729	0.294775	0.286073	0.339953	0.416968		50	0.335063	0.231724	0.207587	0.145572	0.274437	0.213021	0.432733	0.260931
60	0.273084	0.228709	0.212174	0.16023	0.305971	0.373552	0.39672	0.413968		60	0.341768	0.183701	0.196933	0.117141	0.277804	0.204613	0.396553	0.2458
70	0.296505	0.293172	0.20222	0.207654	0.358511	0.52359	0.384657	0.404393		70	0.327197	0.201036	0.197277	0.13881	0.254451	0.205692	0.383292	0.237171
80	0.302233	0.303407	0.194376	0.244257	0.424503	0.505196	0.342983	0.524618		80	0.298111	0.19301	0.175574	0.10215	0.220273	0.194247	0.407783	0.223375
90	0.287148	0.291869	0.152332	0.224223	0.37775	0.365158	0.285085	0.385882		90	0.228283	0.162518	0.176208	0.131586	0.222371	0.234203	0.417184	0.198349
100	0.12082	0.296809	0.172753	0.19724	0.338983	0.316546	0.343993	0.36355		100	0.145258	0.120748	0.168252	0.145895	0.228914	0.161582	0.374147	0.192447
110	0.0697418	0.305487	0.199874	0.291585	0.393515	0.264775	0.4154	0.315798		110	0.123567	0.0746629	0.183709	0.178036	0.307403	0.188505	0.329568	0.202607
120	0.0691861	0.277853	0.206875	0.207901	0.53556	0.287585	0.285191	0.275905		120	0.104242	0.0979913	0.165152	0.168646	0.263676	0.168969	0.314213	0.193702
130	0.0437306	0.253794	0.21416	0.202564	0.513395	0.352503	0.275444	0.255204		130	0.105989	0.0913206	0.140506	0.158092	0.234878	0.136173	0.292014	0.177064
area under the curve	3.29067	3.92112	2.78144	2.34579	5.00621	5.08319	5.14098	4.66758	4.29435		4.14424	2.72743	2.58107	2.08017	3.37292	2.89849	4.93205	3.09539	2.99694	signrank test P =0.0547
																				Mann-U test P =0.1605
		38.6139
			ANOVA
			1	2	2.08393	4.29826	6.5126	0.000219443
			1	3	4.16145	6.37579	8.59012	1.10246e-06				1	2	0.899645	2.29687	3.6941	0.00128544
			2	3	-0.136811	2.07752	4.29185	0.0684937				1	3	1.51495	2.91218	4.3094	9.43811e-05
												2	3	-0.781915	0.61531	2.01253	0.518636
			1	2	-0.786233	7.5	15.7862	0.0855426					1	2	1.33877	9.625	17.9112	0.0178072
			1	3	5.96377	14.25	22.5362	0.000164518					1	3	4.21377	12.5	20.7862	0.00118399
			2	3	-1.53623	6.75	15.0362	0.136037					2	3	-5.41123	2.875	11.1612	0.694849
