# Supplementary material for: Endopiriform neurons projecting to ventral CA1 are a critical node for recognition memory
Source: eLife. 2025 Jan 21;13:RP99642. doi: 10.7554/eLife.99642 (PMC11750136; doi:10.7554/eLife.99642)
Supplement: Figure 4—source data 1. [file elife-99642-fig4-data1.xlsx]

## Sheet: AP histogram
CLA	-3000	-2500	-2000	-1500	-1000	-500	0	500	1000	1500	2000	2500	3000	sum					DEn	-3000	-2500	-2000	-1500	-1000	-500	0	500	1000	1500	2000	2500	3000	sum
AT297	0	2	5	6	5	6	6	4	3	3	4	0	0	44					AT297	0	4	14	14	14	13	11	2	3	2	3	0	0	80
AT296	0	3	6	7	6	6	7	5	4	4	5	1	0	54					AT296	4	14	22	23	23	23	11	3	3	2	3	1	0	132
AT295	0	1	2	1	1	2	3	2	2	2	2	0	0	18					AT295	9	10	8	8	8	8	7	0	0	0	1	0	0	59
AT293	1	0	1	1	0	2	1	0	1	0	1	0	0	8					AT293	1	4	3	3	3	2	0	0	0	0	0	0	0	16
AT294	0	2	2	2	2	1	4	1	1	1	1	0	0	17					AT294	0	13	15	15	16	15	5	2	2	2	2	0	0	87
CLA+DEn	-3000	-2500	-2000	-1500	-1000	-500	0	500	1000	1500	2000	2500	3000	sum
AT297	0	6	19	20	19	19	17	6	6	5	7	0	0	124						-4000	-3000	-2500	-2000	-1500	-1000	-500	0	500	1000	1500	2000	2500	3000
AT296	4	17	28	30	29	29	18	8	7	6	8	2	0	186					AT297	0	0	0.05	0.175	0.175	0.175	0.1625	0.1375	0.025	0.0375	0.025	0.0375	0	0
AT295	9	11	10	9	9	10	10	2	2	2	3	0	0	77					AT296	0	0.030303	0.106061	0.166667	0.174242	0.174242	0.174242	0.0833333	0.0227273	0.0227273	0.0151515	0.0227273	0.00757576	0
AT293	2	4	4	4	3	4	1	0	1	0	1	0	0	24					AT295	0	0.152542	0.169492	0.135593	0.135593	0.135593	0.135593	0.118644	0	0	0	0.0169492	0	0
AT294	0	15	17	17	18	16	9	3	3	3	3	0	0	104					AT293	0	0.0625	0.25	0.1875	0.1875	0.1875	0.125	0	0	0	0	0	0	0
																			AT294	0	0	0.149425	0.172414	0.172414	0.183908	0.172414	0.0574713	0.0229885	0.0229885	0.0229885	0.0229885	0	0
																				0	0.030303	0.149425	0.172414	0.174242	0.175	0.1625	0.0833333	0.0227273	0.0227273	0.0151515	0.0227273	0	0
normalized	-4000	-3000	-2500	-2000	-1500	-1000	-500	0	500	1000	1500	2000	2500	3000
AT297	0	0	0.0483871	0.153226	0.16129	0.153226	0.153226	0.137097	0.0483871	0.0483871	0.0403226	0.0564516	0	0
AT296	0	0.0215054	0.0913978	0.150538	0.16129	0.155914	0.155914	0.0967742	0.0430108	0.0376344	0.0322581	0.0430108	0.0107527	0
AT295	0	0.116883	0.142857	0.12987	0.116883	0.116883	0.12987	0.12987	0.025974	0.025974	0.025974	0.038961	0	0
AT293	0	0.0869565	0.173913	0.173913	0.173913	0.130435	0.173913	0.0434783	0	0.0434783	0	0.0434783	0	0
AT294	0	0	0.144231	0.163462	0.163462	0.173077	0.153846	0.0865385	0.0288462	0.0288462	0.0288462	0.0288462	0	0
median	0	0.0215054	0.142857	0.153226	0.16129	0.153226	0.153846	0.0967742	0.0288462	0.0376344	0.0288462	0.0430108	0	0
			AP>0	AP<0
		AT297	0.330645	0.669355
		AT296	0.252688	0.715054
		AT295	0.246753	0.636364
		AT293	0.130435	0.826087
		AT294	0.201923	0.798077
		Median	0.246753	0.715054
					sign rank test p = 0.0313
