# Supplementary material for: Endopiriform neurons projecting to ventral CA1 are a critical node for recognition memory
Source: eLife. 2025 Jan 21;13:RP99642. doi: 10.7554/eLife.99642 (PMC11750136; doi:10.7554/eLife.99642)
Supplement: Figure 4—source data 2. [file elife-99642-fig4-data2.xlsx]

## Sheet: Sheet1
			TTX+4AP								SLM (-), RS (+)						Peak Amplitude						Area
experimental date	mouseID	cellID	Rs	Ri	Cm	LED5%	LED10%	average	normalized by average	laminer position	normalized depth	distance from border	Layer thickness		Laminar position		Laminar position						Laminar position
20230320	AT342_F	AT0528	23	204	29	0	35.13	16.34	2.14994	4	-0.39285	48	-122.184		1: Py layer		1	2	3	4			1	2	3	4
		AT0529	15	143	44	0	8.71		0.533048	3	-0.197817	25.739	-130.115		2:radiatum			0.317013	0.533048	2.14994		AT0557	6.58	4.28	12.94		7.93333
		AT0530	21	266	16	0	5.18		0.317013	2	0.253041	14.708	58.125		3:border			0.236986	2.14751	0.615507		NY0474	36.27		0	21.72	19.33
		AT0531	37	321	46	3.12	6.91	2.30333	3	3	-0.0469306	4.95	-105.475		4: lacnosum			2.19457	0.396088	0.40934		NY0520	8.53	0	2.03	0	2.64
		AT0532	34	562	16	0	0		0	2	0.573007	39	68.062					0.25667	0	2.34514		AT0594	4.44	0	7.53		3.99
		AT0533	14	195	30	0	0		0	4	-0.738534	75.911	-102.786					1.59537	0.532892	0.871738		AT0596	20.79	5.13	13.78	0	9.925
		NY0452	40	312	17	10.39	58.72	27.3433	2.14751	3	0.0887011	10.77	121.419					0.370277	2.18808	0.441646		AT0602	0	5.66	5.12	0	2.695
		NY0453	21	573	19	9.96	16.83		0.615507	4	-0.318405	88.091	-276.663					2.29903	0.58445	0.116519		AT0608	0	12.72	13.52	0	6.56
		NY0454	42	249	41	2.24	6.48		0.236986	2	0.670755	80.502	120.017					0.197767	2.80459	0.395534		AT0612	7.62	10.48	13.06	5.29	9.1125
20230321	AT345_M	AT0534	26	409	33	0	0		0	4	-0.363399	46.615	-128.275	*radial axis				0.927255	1.14001	0.932735		NY0535	36.86	95.61	11.75	5.92	37.535
		AT0535	24	237	23	11.29	18.83	47.54	0.396088	3	0.0779707	6.08	77.978					0.303691	0.981653	1.71466			0.829412	0.539496	1.63109	NaN
		AT0536	21	150	32	0	104.33		2.19457	2	0.757674	58.694	77.466			AT0557	1.14451	0.731203	1.12429	NaN			1.87636	NaN	0	1.12364
		AT0537	15	187	36	10.14	19.46		0.40934	4	-0.967603	121.828	-125.907			NY0474	1.26003	NaN	0	0.397016			3.23106	0	0.768939	0
		AT0538	31	546	24	0	0	25.6361	0	3	-0.1773	23.927	-134.952			NY0520	3.04761	0	0.952387	0			1.11278	0	1.88722	NaN
		AT0539	12	113	57	0	6.58		0.25667	2	0.494559	30.042	60.745			AT0594	1.07823	0	1.92177	NaN			2.09471	0.516877	1.38841	0
		AT0540	25	204	41	0	60.12		2.34514	4	-0.561131	65.7	-117.085			AT0596	1.80781	0.862014	1.33017	0			0	2.10019	1.89981	0
		AT0541	38	403	23	19.59	35.8442		1.3982	4	-0.239942	28.151	-117.324			AT0602	0	1.78759	2.21241	0			0	1.93902	2.06098	0
		NY0455	27	543	47	10.45	29	54.42	0.532892	3	0.0766967	8.86	115.52			AT0608	0	1.54498	2.45502	0			0.836214	1.15007	1.4332	0.580521
		NY0456	28	677	30	38.33	47.44		0.871738	4	-0.240362	53	-220.501			AT0612	1.198	1.198	1.12321	0.480803			0.982017	2.54722	0.313041	0.157719
		NY0457	34	293	47	8.35	31.13		0.572032	4	-0.971083	212.941	-219.282	*radial axis		NY0535	0.838772	2.72014	0.338852	0.102234
		NY0458	37	124	56	51.12	86.82		1.59537	2	0.602611	78.918	130.96										1.21806	1.09911	1.26474	0.265983
20230324	AT344_M	AT0544	20	265	33	17.62	52.12	23.82	2.18808	3	-0.181753	19.039	-104.752			median	1.14451	1.03001	1.12429	0		median	0.982017	0.844782	1.4332	0
		AT0545	28	219	36	5.89	8.82		0.370277	2	0.414934	19.66	47.381			positive neuron	7	6	8	3
		AT0546	31	211	37	4.22	6.69		0.280856		-0.602745	64.595	-107.168	*radial axis		total neuron	9	8	9	7
		AT0547	22	186	35	7.13	10.52		0.441646	4	-0.457331	55.231	-120.768				1.15277	1.10549	1.27312	0.140007
		AT0548	27	221	33	7.92	28.34	48.49	0.58445	3	-0.221328	28.258	-127.675			connection probability	0.777778	0.75	0.888889	0.428571
		AT0549	18	188	24	50.07	111.48		2.29903	2	0.444759	24.021	54.009
		AT0550	19	279	23	0	5.65		0.116519	4	-0.877415	111.086	-126.606
		AT0551	19	242	35	13.04	26.03		0.607114		-0.571642	71.784	-125.575	*radial axis
		NY0467	24	184	47	7.4	13.02	32.9175	0.395534	4	-0.519016	85.51	-164.754
		NY0468	23	241	28	0	6.51		0.197767	2	0.561122	64.125	114.28
		NY0469	24	365	26	13.61	19.82		0.602111	4	-0.9956	168.126	-168.869	*radial axis
		NY0470	25	277	43	67.43	92.32		2.80459	3	0.0703032	10	142.241										1	2	-1.00711	0.117778	1.24267	0.991731
20230325	AT343_M	AT0552	30	188	42	7.54	18.61	20.07	0.927255	2	0.0883652	5.523	62.502										1	3	-1.13797	-0.0466667	1.04464	0.999421
		AT0553	30	398	25	13.43	22.88		1.14001	3	-0.0642479	7.517	-117										1	4	-0.21459	0.952063	2.11872	0.140762
		AT0554	12	136	56	12.11	23.27		1.15944	4	-0.804568	103.325	-128.423	*radial axis									2	3	-1.28934	-0.164444	0.960446	0.978191
		AT0555	19	173	29	8.96	18.72		0.932735	4	-0.576337	70.456	-122.248										2	4	-0.363844	0.834286	2.03242	0.251398
		AT0556	25	153	42	14.17	25.57	22.7433	1.12429	3	-0.0717635	7.071	-98.532										3	4	-0.167923	0.99873	2.16538	0.113937
		AT0557	35	285	67	0	26.03		1.14451	1	0.815971	51.039	62.55
		AT0558	18	283	29	14.28	32.78		1.4413	4	-0.428986	48.523	-113.111	*radial axis
		AT0559	35	783	12	0	16.63		0.731203	2	0.327481	20.797	63.506
		NY0471	29	268	30	0	2.37		0	3	-0.14774	30.463	-206.194
		NY0472	16	211	27	136.57	223.1	116.267	1.91885		-0.104293	19.912	-190.924	*radial axis
		NY0473	23	189	40	16.47	46.16		0.397016	4	-0.896949	197.728	-220.445
		NY0474	23	195	25	84.49	146.5		1.26003	1	1	135.204	135.204
		NY0475	25	122	57	26	49.31		0.424108		1	144.222	144.222	*radial axis
20230511	AT364_F	AT0587	26	174	57		49.853	50.7848	0.981653	3
		AT0588	25	274	35		87.0784		1.71466	4
		AT0589	31	394	42		15.4229		0.303691	2
		NY0518	30	249	30		5.2602	5.52318	0.952387	3
		NY0519	47	332	39		0		0	4						1 (Py-SR)	2 (SR)	-1.00443	0.0483333	1.1011	0.999284
		NY0520	17	118	40		16.8325		3.04761	1						1 (Py-SR)	3 (SR-SLM)	-1.14022	-0.118889	0.902445	0.988725
		NY0521	32	483	33		0		0	2						1 (Py-SR)	4 (SLM)	-0.078519	1.01333	2.10519	0.0763316
20230516	AT363_F	AT0591	20	166	40		44.6134	11.7928	3.7831	3				*radial axis		2 (SR)	3 (SR-SLM)	-1.21999	-0.167222	0.885545	0.972346
		AT0592	20	186	33		22.663		1.92177	3						2 (SR)	4 (SLM)	-0.15631	0.965	2.08631	0.11118
		AT0593	36	1057	9		0		0	2						3 (SR-SLM)	4 (SLM)	0.0403699	1.13222	2.22407	0.039901
		AT0594	24	228	18		12.7154		1.07823	1
		AT0595	25	226	22		19.0731	22.1262	0.862014	2
		AT0596	28	79	58		40		1.80781	1
		AT0597	28	211	33		0		0	4
		AT0598	32	394	34		29.4317		1.33017	3
		AT0599	17	320	43		17.8399	8.06358	2.21241	3
		AT0600	29	398	26		0		0	4
		AT0601	24	616	22		14.4144		1.78759	2
		AT0602	22	330	53		0		0	1
20230517	AT365_F	no response in all profiles
		AT0606	17	204	31		77.772	31.6788	2.45502	3
		AT0607	24	298	31		48.9432		1.54498	2
		AT0608	10	49	74		0		0	1
		AT0609	18	299	29		0		0	4
		no response in all profiles
		no response in all profiles
20230518	AT366_F	AT0610	27	238	42		23.0466	20.5186	1.12321	3
		AT0611	28	166	33		24.5812		1.198	2
		AT0612	18	131	63		24.5812		1.198	1
		AT0613	29	264	31		9.8654		0.480803	4
		NY0531	27	222	38		34.6512	102.261	0.338852	3
		NY0532	24	266	31		10.4545		0.102234	4
		NY0533	37	139	92		278.163		2.72014	2
		NY0535	31	642	27		85.7733		0.838772	1
