# Supplementary material for: Endopiriform neurons projecting to ventral CA1 are a critical node for recognition memory
Source: eLife. 2025 Jan 21;13:RP99642. doi: 10.7554/eLife.99642 (PMC11750136; doi:10.7554/eLife.99642)
Supplement: Figure 5—source data 1. [file elife-99642-fig5-data1.xlsx]

## Sheet: raw data
experimantal date	animal ID	sliceID	cellID	RS	Ri	Cm	LED 5% 1st -70mV	2nd	PPR	LED 5% 1st +12mV	2nd	PPR	I/(I+E)	RS	Ri	Cm	ttx 4AP LED 1% 1st	0.02	0.03	0.04	0.05	0.07	0.1
Superficial
20220328	AT130_F	slice1	AT0242											13	160	242	0	0	0	0	0	5.3894	8.1846
		slice2	AT0243	10	165	226	19.2375	5.9192	3.25002	103.988	11.5644	8.99211	0.843884	9	92	243	0	0	0	0	10.4317	12.1125	18.1961
		slice3	NY0177	16	155	231	63.9254	12.5294	5.10203	74.1112	5.662	13.0892	0.536895				0	0	0	0	0	0	0
		slice4	NY0179	13	182	265	39.4877	18.9585	2.08285	425.542	141.841	3.00012	0.915086				0	0	0	0	6.2464	17.1685	31.4148
20220329	AT129_F	slice1	AT0245	22	110	87	0	0	NA	722.967	317.811	2.27483	1
		slice2	AT0248	11	196	126	0	0	NA	59.7769	16.0952	3.71396	1
		slice3	NY0181	25	169	200	5.3697	7.34231	0.731337	125.878	139.613	0.901622	0.959087
		slice4	NY0183	11	171	242	66.0076	43.3962	1.52105	828.4	425.049	1.94895	0.9262
20220329	AT133_M	slice1	AT0250	27	370	72	0	0	NA	0	0	NA
		slice2	AT0251	19	172	113	0	0	NA	0	0	NA
		slice3	NY0185	14	175	175	16.6937	6.4291	2.59658	94.8471	39.9991	2.37123	0.850335
		slice4	NY0188	13	200	217	32.675	34.6467	0.943091	391.571	118.152	3.31411	0.922981
20220330	AT134_M	slice1	AT0253	11	143	142	0	0	NA	60.8227	206.113	0.295094	1
		slice2	AT0257	12	203	114	0	0	NA	0	0	NA
		slice3	NY0190	12	148	278	25.9198	9.6984	2.67259	843.87	99	8.52394	0.9702	11	106	315	0	0	0	0	0	5.7533	11.9084
		slice4	NY0191	10	144	283	6.2647	4.4383	1.41151	28.5655	1.5525	18.3997	0.820136
			Excitatory					Inhibitory
			Pairwise data					Pairwise data
			AT0243	AT0241	19.2375	0		AT0243	AT0241	103.988	600
			AT0245	AT0246	0	56.6346		AT0245	AT0246	722.967	638.801
			AT0248	AT0247	0	0		AT0248	AT0247	59.7769	200.121
			NY0181	NY0182	5.3697	12.712		NY0181	NY0182	125.878	495.915
			NY0183	NY0184	66.0076	111.559		NY0183	NY0184	828.4	1013.9
			NY0185	NY0186	16.6937	0		NY0185	NY0186	94.8471	638.049
			NY0188	NY0187	32.675	21.4242		NY0188	NY0187	391.571	488.902
			AT0253	AT0254	0	0		AT0253	AT0254	60.8227	133.566
			NY0190	NY0189	25.9198	11.7805		NY0190	NY0189	843.87	306.185
			NY0191	NY0192	6.2647	0		NY0191	NY0192	28.5655	12.986
				median	11.4792	5.89025			median	114.933	492.408
				CP	0.7	0.5			CP	1	1
					ttest	P = 0.6248				ttest	p=0.2325
Deep
experimantal date	animal ID	sliceID	cellID	RS	Ri	Cm	LED 5% 1st -70mV	2nd	PPR	LED 5% 1st +12mV	2nd	PPR	I/(I+E)	RS	Ri	Cm	ttx 4AP LED 1% 1st	0.02	0.03	0.04	0.05	0.07	0.1
20220328	AT130_F	slice1	AT0241	10	211	230	0	0	NA	600	432.432	1.3875	1	10	120	264	0	0	0	0	7.3625	0	0
		slice2	AT0244											9	87	327	0	0	0	0	0	0	0
		slice3	NY0178											13	80	219	0	0	0	0	0	0	0
		slice4	NY0180											10	79	289	0	0	0	0	16.1823	43.6519	49.8618
20220329	AT129_F	slice1	AT0246	15	165	181	56.6346	38.1096	1.4861	638.801	126.697	5.04196	0.918562	20	140	193	0	0	0	0	6.2298	0	6.2481
		slice2	AT0247	9	181	203	0	0	NA	200.121	147.981	1.35235	1
		slice3	NY0182	13	163	130	12.712	7.3788	1.72277	495.915	575.037	0.862406	0.975007
		slice4	NY0184	14	169	114	111.559	55.1585	2.02252	1013.9	639.291	1.58598	0.900877
20220329	AT133_M	slice1	AT0249	18	230	36	0	0	NA	0	0	NA
		slice2	AT0252	10	147	151	0	0	NA	0	0	NA
		slice3	NY0186	22	152	203	0	0	NA	638.049	422.803	1.50909	1	19	217	242	0	0	0	0	0	0	7.2327
		slice4	NY0187	14	132	110	21.4242	5.9542	3.59817	488.902	163.065	2.99821	0.958019
20220330	AT134_M	slice1	AT0254	19	134	190	0	0	NA	133.566	67.0115	1.99318	1	11	88	190	0	0	0	0	0	0	0
		slice2	AT0255	15	133	265	0	0	NA	0	0	NA
		slice2	AT0256	11	97	230	0	0	NA	0	0	NA
		slice3	NY0189	20	171	204	11.7805	7.1779	1.64122	306.185	135.412	2.26113	0.96295
		slice4	NY0192	16	298	280	0	0	NA	12.986	1.2968	10.0139	1
