# Supplementary material for: Endopiriform neurons projecting to ventral CA1 are a critical node for recognition memory
Source: eLife. 2025 Jan 21;13:RP99642. doi: 10.7554/eLife.99642 (PMC11750136; doi:10.7554/eLife.99642)
Supplement: Figure 6—source data 1. [file elife-99642-fig6-data1.xlsx]

## Sheet: all
		AT288 Slide1_1	AT288 Slide1_2	AT288 Slide2_1	AT288 Slide2_2	AT288 Slide3_1	AT288 Slide3_2	AT288	AT289 Slide1	AT289 Slide2	AT289 Slide3	AT289	AT290 Slide1	AT290 Slide2	AT290 Slide3	AT290	AT291 Slide1	AT291 Slide2	AT291 Slide3	AT291
1	'Whole Brain'	191	590	329	99	66	26	1301	76	937	203	1216	1203	448	50	1701	1041	217	66	1324
2	'Cerebrum'	191	590	317	81	59	13	1251	76	928	136	1140	1191	416	41	1648	1038	182	57	1277
3	'Cerebral cortex'	107	441	221	78	59	13	919	76	783	132	991	943	346	41	1330	786	149	57	992
4	'Cortical plate'	81	240	127	46	55	13	562	76	631	100	807	687	229	41	957	564	95	55	714
5	'Isocortex'	13	51	11	13	18	5	111	55	394	24	473	105	47	5	157	216	12	5	233
6	'Frontal pole, cerebral cortex'	0	0	0	0	0	0	0	0	0	0	0	0	0	0	0	0	0	0	0
7	'Frontal pole, layer 1'	0	0	0	0	0	0	0	0	0	0	0	0	0	0	0	0	0	0	0
8	'Frontal pole, layer 2/3'	0	0	0	0	0	0	0	0	0	0	0	0	0	0	0	0	0	0	0
9	'Frontal pole, layer 5'	0	0	0	0	0	0	0	0	0	0	0	0	0	0	0	0	0	0	0
10	'Frontal pole, layer 6a'	0	0	0	0	0	0	0	0	0	0	0	0	0	0	0	0	0	0	0
11	'Frontal pole, layer 6b'	0	0	0	0	0	0	0	0	0	0	0	0	0	0	0	0	0	0	0
12	'Somatomotor areas'	3	3	3	0	0	0	9	5	71	0	76	3	3	0	6	39	0	0	39
13	'Primary motor area'	3	3	3	0	0	0	9	3	44	0	47	3	0	0	3	7	0	0	7
14	'Primary motor area, Layer 1'	0	0	3	0	0	0	3	0	9	0	9	0	0	0	0	3	0	0	3
15	'Primary motor area, Layer 2/3'	0	0	0	0	0	0	0	3	11	0	14	0	0	0	0	4	0	0	4
16	'Primary motor area, Layer 5'	0	0	0	0	0	0	0	0	12	0	12	0	0	0	0	0	0	0	0
17	'Primary motor area, Layer 6a'	3	3	0	0	0	0	6	0	8	0	8	3	0	0	3	0	0	0	0
18	'Primary motor area, Layer 6b'	0	0	0	0	0	0	0	0	4	0	4	0	0	0	0	0	0	0	0
19	'Secondary motor area'	3	0	0	0	0	0	3	3	27	0	30	0	3	0	3	32	0	0	32
20	'Secondary motor area, layer 1'	0	0	0	0	0	0	0	3	6	0	9	0	0	0	0	30	0	0	30
21	'Secondary motor area, layer 2/3'	3	0	0	0	0	0	3	3	3	0	6	0	3	0	3	3	0	0	3
22	'Secondary motor area, layer 5'	3	0	0	0	0	0	3	3	10	0	13	0	0	0	0	0	0	0	0
23	'Secondary motor area, layer 6a'	0	0	0	0	0	0	0	0	4	0	4	0	0	0	0	3	0	0	3
24	'Secondary motor area, layer 6b'	0	0	0	0	0	0	0	0	4	0	4	0	0	0	0	0	0	0	0
25	'Somatosensory areas'	3	3	3	3	0	0	12	0	43	3	46	5	9	0	14	3	4	0	7
26	'Primary somatosensory area'	3	0	3	3	0	0	9	0	34	0	34	4	5	0	9	3	3	0	6
27	'Primary somatosensory area, nose'	0	0	3	0	0	0	3	0	4	0	4	3	3	0	6	0	3	0	3
28	'Primary somatosensory area, nose, layer 1'	0	0	0	0	0	0	0	0	3	0	3	0	0	0	0	0	0	0	0
29	'Primary somatosensory area, nose, layer 2/3'	0	0	3	0	0	0	3	0	3	0	3	0	0	0	0	0	3	0	3
30	'Primary somatosensory area, nose, layer 4'	0	0	0	0	0	0	0	0	3	0	3	0	0	0	0	0	0	0	0
31	'Primary somatosensory area, nose, layer 5'	0	0	0	0	0	0	0	0	0	0	0	0	0	0	0	0	0	0	0
32	'Primary somatosensory area, nose, layer 6a'	0	0	0	0	0	0	0	0	0	0	0	3	3	0	6	0	0	0	0
33	'Primary somatosensory area, nose, layer 6b'	0	0	0	0	0	0	0	0	0	0	0	0	0	0	0	0	0	0	0
34	'Primary somatosensory area, barrel field'	0	0	0	3	0	0	3	0	0	0	0	0	3	0	3	0	0	0	0
35	'Primary somatosensory area, barrel field, layer 1'	0	0	0	0	0	0	0	0	0	0	0	0	0	0	0	0	0	0	0
36	'Primary somatosensory area, barrel field, layer 2/3'	0	0	0	3	0	0	3	0	0	0	0	0	0	0	0	0	0	0	0
37	'Primary somatosensory area, barrel field, layer 4'	0	0	0	0	0	0	0	0	0	0	0	0	0	0	0	0	0	0	0
38	'Primary somatosensory area, barrel field, layer 5'	0	0	0	0	0	0	0	0	0	0	0	0	0	0	0	0	0	0	0
39	'Primary somatosensory area, barrel field, layer 6a'	0	0	0	0	0	0	0	0	0	0	0	0	3	0	3	0	0	0	0
40	'Primary somatosensory area, barrel field, layer 6b'	0	0	0	0	0	0	0	0	0	0	0	0	3	0	3	0	0	0	0
41	'Rostrolateral lateral visual area'	0	0	0	0	0	0	0	0	0	0	0	0	0	0	0	0	0	0	0
42	'Primary somatosensory area, lower limb'	0	0	0	3	0	0	3	0	3	0	3	0	0	0	0	0	0	0	0
43	'Primary somatosensory area, lower limb, layer 1'	0	0	0	0	0	0	0	0	0	0	0	0	0	0	0	0	0	0	0
44	'Primary somatosensory area, lower limb, layer 2/3'	0	0	0	0	0	0	0	0	0	0	0	0	0	0	0	0	0	0	0
45	'Primary somatosensory area, lower limb, layer 4'	0	0	0	0	0	0	0	0	0	0	0	0	0	0	0	0	0	0	0
46	'Primary somatosensory area, lower limb, layer 5'	0	0	0	0	0	0	0	0	3	0	3	0	0	0	0	0	0	0	0
47	'Primary somatosensory area, lower limb, layer 6a'	0	0	0	0	0	0	0	0	3	0	3	0	0	0	0	0	0	0	0
48	'Primary somatosensory area, lower limb, layer 6b'	0	0	0	3	0	0	3	0	3	0	3	0	0	0	0	0	0	0	0
49	'Primary somatosensory area, mouth'	3	0	3	0	0	0	6	0	18	0	18	3	0	0	3	3	0	0	3
50	'Primary somatosensory area, mouth, layer 1'	0	0	3	0	0	0	3	0	3	0	3	0	0	0	0	3	0	0	3
51	'Primary somatosensory area, mouth, layer 2/3'	3	0	3	0	0	0	6	0	6	0	6	0	0	0	0	0	0	0	0
52	'Primary somatosensory area, mouth, layer 4'	0	0	0	0	0	0	0	0	3	0	3	3	0	0	3	0	0	0	0
53	'Primary somatosensory area, mouth, layer 5'	0	0	0	0	0	0	0	0	4	0	4	3	0	0	3	0	0	0	0
54	'Primary somatosensory area, mouth, layer 6a'	0	0	0	0	0	0	0	0	4	0	4	3	0	0	3	3	0	0	3
55	'Primary somatosensory area, mouth, layer 6b'	0	0	0	0	0	0	0	0	0	0	0	0	0	0	0	0	0	0	0
56	'Primary somatosensory area, upper limb'	0	0	0	0	0	0	0	0	7	0	7	0	0	0	0	0	3	0	3
57	'Primary somatosensory area, upper limb, layer 1'	0	0	0	0	0	0	0	0	0	0	0	0	0	0	0	0	0	0	0
58	'Primary somatosensory area, upper limb, layer 2/3'	0	0	0	0	0	0	0	0	3	0	3	0	0	0	0	0	0	0	0
59	'Primary somatosensory area, upper limb, layer 4'	0	0	0	0	0	0	0	0	3	0	3	0	0	0	0	0	0	0	0
60	'Primary somatosensory area, upper limb, layer 5'	0	0	0	0	0	0	0	0	0	0	0	0	0	0	0	0	0	0	0
61	'Primary somatosensory area, upper limb, layer 6a'	0	0	0	0	0	0	0	0	3	0	3	0	0	0	0	0	3	0	3
62	'Primary somatosensory area, upper limb, layer 6b'	0	0	0	0	0	0	0	0	0	0	0	0	0	0	0	0	0	0	0
63	'Primary somatosensory area, trunk'	0	0	0	0	0	0	0	0	0	0	0	0	3	0	3	0	0	0	0
64	'Primary somatosensory area, trunk, layer 1'	0	0	0	0	0	0	0	0	0	0	0	0	3	0	3	0	0	0	0
65	'Primary somatosensory area, trunk, layer 2/3'	0	0	0	0	0	0	0	0	0	0	0	0	0	0	0	0	0	0	0
66	'Primary somatosensory area, trunk, layer 4'	0	0	0	0	0	0	0	0	0	0	0	0	0	0	0	0	0	0	0
67	'Primary somatosensory area, trunk, layer 5'	0	0	0	0	0	0	0	0	0	0	0	0	0	0	0	0	0	0	0
68	'Primary somatosensory area, trunk, layer 6a'	0	0	0	0	0	0	0	0	0	0	0	0	0	0	0	0	0	0	0
69	'Primary somatosensory area, trunk, layer 6b'	0	0	0	0	0	0	0	0	0	0	0	0	0	0	0	0	0	0	0
70	'Primary somatosensory area, unassigned'	0	0	0	0	0	0	0	0	3	0	3	0	0	0	0	0	0	0	0
71	'Primary somatosensory area, unassigned, layer 1'	0	0	0	0	0	0	0	0	3	0	3	0	0	0	0	0	0	0	0
72	'Primary somatosensory area, unassigned, layer 2/3'	0	0	0	0	0	0	0	0	0	0	0	0	0	0	0	0	0	0	0
73	'Primary somatosensory area, unassigned, layer 4'	0	0	0	0	0	0	0	0	3	0	3	0	0	0	0	0	0	0	0
74	'Primary somatosensory area, unassigned, layer 5'	0	0	0	0	0	0	0	0	0	0	0	0	0	0	0	0	0	0	0
75	'Primary somatosensory area, unassigned, layer 6a'	0	0	0	0	0	0	0	0	0	0	0	0	0	0	0	0	0	0	0
76	'Primary somatosensory area, unassigned, layer 6b'	0	0	0	0	0	0	0	0	0	0	0	0	0	0	0	0	0	0	0
77	'Supplemental somatosensory area'	0	3	0	3	0	0	6	0	9	3	12	3	4	0	7	0	3	0	3
78	'Supplemental somatosensory area, layer 1'	0	0	0	0	0	0	0	0	0	0	0	0	0	0	0	0	0	0	0
79	'Supplemental somatosensory area, layer 2/3'	0	0	0	0	0	0	0	0	4	3	7	0	3	0	3	0	0	0	0
80	'Supplemental somatosensory area, layer 4'	0	0	0	0	0	0	0	0	3	0	3	0	0	0	0	0	0	0	0
81	'Supplemental somatosensory area, layer 5'	0	0	0	3	0	0	3	0	0	3	3	0	3	0	3	0	3	0	3
82	'Supplemental somatosensory area, layer 6a'	0	3	0	0	0	0	3	0	4	0	4	3	3	0	6	0	0	0	0
83	'Supplemental somatosensory area, layer 6b'	0	0	0	0	0	0	0	0	0	0	0	0	3	0	3	0	3	0	3
84	'Gustatory areas'	0	7	0	0	0	0	7	0	5	0	5	8	0	0	8	3	0	0	3
85	'Gustatory areas, layer 1'	0	0	0	0	0	0	0	0	0	0	0	0	0	0	0	0	0	0	0
86	'Gustatory areas, layer 2/3'	0	0	0	0	0	0	0	0	0	0	0	3	0	0	3	0	0	0	0
87	'Gustatory areas, layer 4'	0	3	0	0	0	0	3	0	3	0	3	0	0	0	0	0	0	0	0
88	'Gustatory areas, layer 5'	0	0	0	0	0	0	0	0	3	0	3	0	0	0	0	3	0	0	3
89	'Gustatory areas, layer 6a'	0	4	0	0	0	0	4	0	3	0	3	7	0	0	7	3	0	0	3
90	'Gustatory areas, layer 6b'	0	3	0	0	0	0	3	0	0	0	0	0	0	0	0	0	0	0	0
91	'Visceral area'	0	0	3	3	0	0	6	0	7	6	13	3	3	0	6	0	0	0	0
92	'Visceral area, layer 1'	0	0	0	0	0	0	0	0	3	0	3	0	0	0	0	0	0	0	0
93	'Visceral area, layer 2/3'	0	0	0	0	0	0	0	0	3	3	6	0	0	0	0	0	0	0	0
94	'Visceral area, layer 4'	0	0	0	0	0	0	0	0	0	3	3	0	0	0	0	0	0	0	0
95	'Visceral area, layer 5'	0	0	3	3	0	0	6	0	3	3	6	0	0	0	0	0	0	0	0
96	'Visceral area, layer 6a'	0	0	0	3	0	0	3	0	3	3	6	3	3	0	6	0	0	0	0
97	'Visceral area, layer 6b'	0	0	0	0	0	0	0	0	3	0	3	0	0	0	0	0	0	0	0
98	'Auditory areas'	0	0	0	0	3	0	3	0	0	0	0	0	3	3	6	0	0	0	0
99	'Dorsal auditory area'	0	0	0	0	0	0	0	0	0	0	0	0	0	0	0	0	0	0	0
100	'Dorsal auditory area, layer 1'	0	0	0	0	0	0	0	0	0	0	0	0	0	0	0	0	0	0	0
101	'Dorsal auditory area, layer 2/3'	0	0	0	0	0	0	0	0	0	0	0	0	0	0	0	0	0	0	0
102	'Dorsal auditory area, layer 4'	0	0	0	0	0	0	0	0	0	0	0	0	0	0	0	0	0	0	0
103	'Dorsal auditory area, layer 5'	0	0	0	0	0	0	0	0	0	0	0	0	0	0	0	0	0	0	0
104	'Dorsal auditory area, layer 6a'	0	0	0	0	0	0	0	0	0	0	0	0	0	0	0	0	0	0	0
105	'Dorsal auditory area, layer 6b'	0	0	0	0	0	0	0	0	0	0	0	0	0	0	0	0	0	0	0
106	'Laterolateral anterior visual area'	0	0	0	0	0	0	0	0	0	0	0	0	0	0	0	0	0	0	0
107	'Primary auditory area'	0	0	0	0	0	0	0	0	0	0	0	0	0	0	0	0	0	0	0
108	'Primary auditory area, layer 1'	0	0	0	0	0	0	0	0	0	0	0	0	0	0	0	0	0	0	0
109	'Primary auditory area, layer 2/3'	0	0	0	0	0	0	0	0	0	0	0	0	0	0	0	0	0	0	0
110	'Primary auditory area, layer 4'	0	0	0	0	0	0	0	0	0	0	0	0	0	0	0	0	0	0	0
111	'Primary auditory area, layer 5'	0	0	0	0	0	0	0	0	0	0	0	0	0	0	0	0	0	0	0
112	'Primary auditory area, layer 6a'	0	0	0	0	0	0	0	0	0	0	0	0	0	0	0	0	0	0	0
113	'Primary auditory area, layer 6b'	0	0	0	0	0	0	0	0	0	0	0	0	0	0	0	0	0	0	0
114	'Posterior auditory area'	0	0	0	0	3	0	3	0	0	0	0	0	0	3	3	0	0	0	0
115	'Posterior auditory area, layer 1'	0	0	0	0	0	0	0	0	0	0	0	0	0	0	0	0	0	0	0
116	'Posterior auditory area, layer 2/3'	0	0	0	0	0	0	0	0	0	0	0	0	0	0	0	0	0	0	0
117	'Posterior auditory area, layer 4'	0	0	0	0	0	0	0	0	0	0	0	0	0	0	0	0	0	0	0
118	'Posterior auditory area, layer 5'	0	0	0	0	3	0	3	0	0	0	0	0	0	3	3	0	0	0	0
119	'Posterior auditory area, layer 6a'	0	0	0	0	0	0	0	0	0	0	0	0	0	0	0	0	0	0	0
120	'Posterior auditory area, layer 6b'	0	0	0	0	0	0	0	0	0	0	0	0	0	0	0	0	0	0	0
121	'Ventral auditory area'	0	0	0	0	3	0	3	0	0	0	0	0	3	0	3	0	0	0	0
122	'Ventral auditory area, layer 1'	0	0	0	0	0	0	0	0	0	0	0	0	0	0	0	0	0	0	0
123	'Ventral auditory area, layer 2/3'	0	0	0	0	0	0	0	0	0	0	0	0	3	0	3	0	0	0	0
124	'Ventral auditory area, layer 4'	0	0	0	0	0	0	0	0	0	0	0	0	0	0	0	0	0	0	0
125	'Ventral auditory area, layer 5'	0	0	0	0	3	0	3	0	0	0	0	0	3	0	3	0	0	0	0
126	'Ventral auditory area, layer 6a'	0	0	0	0	0	0	0	0	0	0	0	0	0	0	0	0	0	0	0
127	'Ventral auditory area, layer 6b'	0	0	0	0	0	0	0	0	0	0	0	0	0	0	0	0	0	0	0
128	'Visual areas'	0	0	0	0	3	3	6	0	0	0	0	0	0	4	4	0	0	3	3
129	'Anterolateral visual area'	0	0	0	0	0	0	0	0	0	0	0	0	0	3	3	0	0	0	0
130	'Anterolateral visual area, layer 1'	0	0	0	0	0	0	0	0	0	0	0	0	0	3	3	0	0	0	0
131	'Anterolateral visual area, layer 2/3'	0	0	0	0	0	0	0	0	0	0	0	0	0	0	0	0	0	0	0
132	'Anterolateral visual area, layer 4'	0	0	0	0	0	0	0	0	0	0	0	0	0	0	0	0	0	0	0
133	'Anterolateral visual area, layer 5'	0	0	0	0	0	0	0	0	0	0	0	0	0	3	3	0	0	0	0
134	'Anterolateral visual area, layer 6a'	0	0	0	0	0	0	0	0	0	0	0	0	0	0	0	0	0	0	0
135	'Anterolateral visual area, layer 6b'	0	0	0	0	0	0	0	0	0	0	0	0	0	0	0	0	0	0	0
136	'Anteromedial visual area'	0	0	0	0	3	0	3	0	0	0	0	0	0	0	0	0	0	0	0
137	'Anteromedial visual area, layer 1'	0	0	0	0	3	0	3	0	0	0	0	0	0	0	0	0	0	0	0
138	'Anteromedial visual area, layer 2/3'	0	0	0	0	0	0	0	0	0	0	0	0	0	0	0	0	0	0	0
139	'Anteromedial visual area, layer 4'	0	0	0	0	0	0	0	0	0	0	0	0	0	0	0	0	0	0	0
140	'Anteromedial visual area, layer 5'	0	0	0	0	3	0	3	0	0	0	0	0	0	0	0	0	0	0	0
141	'Anteromedial visual area, layer 6a'	0	0	0	0	0	0	0	0	0	0	0	0	0	0	0	0	0	0	0
142	'Anteromedial visual area, layer 6b'	0	0	0	0	0	0	0	0	0	0	0	0	0	0	0	0	0	0	0
143	'Lateral visual area'	0	0	0	0	0	0	0	0	0	0	0	0	0	0	0	0	0	0	0
144	'Lateral visual area, layer 1'	0	0	0	0	0	0	0	0	0	0	0	0	0	0	0	0	0	0	0
145	'Lateral visual area, layer 2/3'	0	0	0	0	0	0	0	0	0	0	0	0	0	0	0	0	0	0	0
146	'Lateral visual area, layer 4'	0	0	0	0	0	0	0	0	0	0	0	0	0	0	0	0	0	0	0
147	'Lateral visual area, layer 5'	0	0	0	0	0	0	0	0	0	0	0	0	0	0	0	0	0	0	0
148	'Lateral visual area, layer 6a'	0	0	0	0	0	0	0	0	0	0	0	0	0	0	0	0	0	0	0
149	'Lateral visual area, layer 6b'	0	0	0	0	0	0	0	0	0	0	0	0	0	0	0	0	0	0	0
150	'Primary visual area'	0	0	0	0	3	3	6	0	0	0	0	0	0	3	3	0	0	3	3
151	'Primary visual area, layer 1'	0	0	0	0	0	3	3	0	0	0	0	0	0	0	0	0	0	0	0
152	'Primary visual area, layer 2/3'	0	0	0	0	3	0	3	0	0	0	0	0	0	0	0	0	0	0	0
153	'Primary visual area, layer 4'	0	0	0	0	0	3	3	0	0	0	0	0	0	3	3	0	0	3	3
154	'Primary visual area, layer 5'	0	0	0	0	0	0	0	0	0	0	0	0	0	0	0	0	0	0	0
155	'Primary visual area, layer 6a'	0	0	0	0	0	0	0	0	0	0	0	0	0	0	0	0	0	0	0
156	'Primary visual area, layer 6b'	0	0	0	0	0	0	0	0	0	0	0	0	0	0	0	0	0	0	0
157	'Posterolateral visual area'	0	0	0	0	0	0	0	0	0	0	0	0	0	0	0	0	0	0	0
158	'Posterolateral visual area, layer 1'	0	0	0	0	0	0	0	0	0	0	0	0	0	0	0	0	0	0	0
159	'Posterolateral visual area, layer 2/3'	0	0	0	0	0	0	0	0	0	0	0	0	0	0	0	0	0	0	0
160	'Posterolateral visual area, layer 4'	0	0	0	0	0	0	0	0	0	0	0	0	0	0	0	0	0	0	0
161	'Posterolateral visual area, layer 5'	0	0	0	0	0	0	0	0	0	0	0	0	0	0	0	0	0	0	0
162	'Posterolateral visual area, layer 6a'	0	0	0	0	0	0	0	0	0	0	0	0	0	0	0	0	0	0	0
163	'Posterolateral visual area, layer 6b'	0	0	0	0	0	0	0	0	0	0	0	0	0	0	0	0	0	0	0
164	'posteromedial visual area'	0	0	0	0	0	0	0	0	0	0	0	0	0	3	3	0	0	0	0
165	'posteromedial visual area, layer 1'	0	0	0	0	0	0	0	0	0	0	0	0	0	0	0	0	0	0	0
166	'posteromedial visual area, layer 2/3'	0	0	0	0	0	0	0	0	0	0	0	0	0	0	0	0	0	0	0
167	'posteromedial visual area, layer 4'	0	0	0	0	0	0	0	0	0	0	0	0	0	0	0	0	0	0	0
168	'posteromedial visual area, layer 5'	0	0	0	0	0	0	0	0	0	0	0	0	0	3	3	0	0	0	0
169	'posteromedial visual area, layer 6a'	0	0	0	0	0	0	0	0	0	0	0	0	0	0	0	0	0	0	0
170	'posteromedial visual area, layer 6b'	0	0	0	0	0	0	0	0	0	0	0	0	0	0	0	0	0	0	0
171	'Laterointermediate area'	0	0	0	0	0	0	0	0	0	0	0	0	0	0	0	0	0	0	0
172	'Laterointermediate area, layer 1'	0	0	0	0	0	0	0	0	0	0	0	0	0	0	0	0	0	0	0
173	'Laterointermediate area, layer 2/3'	0	0	0	0	0	0	0	0	0	0	0	0	0	0	0	0	0	0	0
174	'Laterointermediate area, layer 4'	0	0	0	0	0	0	0	0	0	0	0	0	0	0	0	0	0	0	0
175	'Laterointermediate area, layer 5'	0	0	0	0	0	0	0	0	0	0	0	0	0	0	0	0	0	0	0
176	'Laterointermediate area, layer 6a'	0	0	0	0	0	0	0	0	0	0	0	0	0	0	0	0	0	0	0
177	'Laterointermediate area, layer 6b'	0	0	0	0	0	0	0	0	0	0	0	0	0	0	0	0	0	0	0
178	'Postrhinal area'	0	0	0	0	0	3	3	0	0	0	0	0	0	0	0	0	0	0	0
179	'Postrhinal area, layer 1'	0	0	0	0	0	0	0	0	0	0	0	0	0	0	0	0	0	0	0
180	'Postrhinal area, layer 2/3'	0	0	0	0	0	0	0	0	0	0	0	0	0	0	0	0	0	0	0
181	'Postrhinal area, layer 4'	0	0	0	0	0	0	0	0	0	0	0	0	0	0	0	0	0	0	0
182	'Postrhinal area, layer 5'	0	0	0	0	0	0	0	0	0	0	0	0	0	0	0	0	0	0	0
183	'Postrhinal area, layer 6a'	0	0	0	0	0	3	3	0	0	0	0	0	0	0	0	0	0	0	0
184	'Postrhinal area, layer 6b'	0	0	0	0	0	0	0	0	0	0	0	0	0	0	0	0	0	0	0
185	'Anterior cingulate area'	0	0	3	0	0	0	3	0	13	0	13	3	0	0	3	3	0	0	3
186	'Anterior cingulate area, dorsal part'	0	0	0	0	0	0	0	0	9	0	9	3	0	0	3	3	0	0	3
187	'Anterior cingulate area, dorsal part, layer 1'	0	0	0	0	0	0	0	0	4	0	4	0	0	0	0	0	0	0	0
188	'Anterior cingulate area, dorsal part, layer 2/3'	0	0	0	0	0	0	0	0	3	0	3	0	0	0	0	0	0	0	0
189	'Anterior cingulate area, dorsal part, layer 5'	0	0	0	0	0	0	0	0	3	0	3	3	0	0	3	3	0	0	3
190	'Anterior cingulate area, dorsal part, layer 6a'	0	0	0	0	0	0	0	0	3	0	3	0	0	0	0	0	0	0	0
191	'Anterior cingulate area, dorsal part, layer 6b'	0	0	0	0	0	0	0	0	0	0	0	0	0	0	0	0	0	0	0
192	'Anterior cingulate area, ventral part'	0	0	3	0	0	0	3	0	4	0	4	0	0	0	0	0	0	0	0
193	'Anterior cingulate area, ventral part, layer 1'	0	0	3	0	0	0	3	0	0	0	0	0	0	0	0	0	0	0	0
194	'Anterior cingulate area, ventral part, layer 2/3'	0	0	0	0	0	0	0	0	3	0	3	0	0	0	0	0	0	0	0
195	'Anterior cingulate area, ventral part, layer 5'	0	0	0	0	0	0	0	0	3	0	3	0	0	0	0	0	0	0	0
196	'Anterior cingulate area, ventral part, 6a'	0	0	3	0	0	0	3	0	0	0	0	0	0	0	0	0	0	0	0
197	'Anterior cingulate area, ventral part, 6b'	0	0	0	0	0	0	0	0	3	0	3	0	0	0	0	0	0	0	0
198	'Prelimbic area'	0	0	0	0	0	0	0	4	7	0	11	3	0	0	3	3	0	0	3
199	'Prelimbic area, layer 1'	0	0	0	0	0	0	0	0	0	0	0	0	0	0	0	0	0	0	0
200	'Prelimbic area, layer 2/3'	0	0	0	0	0	0	0	0	0	0	0	3	0	0	3	0	0	0	0
201	'Prelimbic area, layer 5'	0	0	0	0	0	0	0	4	3	0	7	0	0	0	0	3	0	0	3
202	'Prelimbic area, layer 6a'	0	0	0	0	0	0	0	0	4	0	4	0	0	0	0	0	0	0	0
203	'Prelimbic area, layer 6b'	0	0	0	0	0	0	0	0	3	0	3	0	0	0	0	0	0	0	0
204	'Infralimbic area'	0	0	0	0	0	0	0	3	3	0	6	0	0	0	0	3	0	0	3
205	'Infralimbic area, layer 1'	0	0	0	0	0	0	0	0	0	0	0	0	0	0	0	0	0	0	0
206	'Infralimbic area, layer 2/3'	0	0	0	0	0	0	0	3	3	0	6	0	0	0	0	0	0	0	0
207	'Infralimbic area, layer 5'	0	0	0	0	0	0	0	0	3	0	3	0	0	0	0	3	0	0	3
208	'Infralimbic area, layer 6a'	0	0	0	0	0	0	0	0	0	0	0	0	0	0	0	0	0	0	0
209	'Infralimbic area, layer 6b'	0	0	0	0	0	0	0	0	0	0	0	0	0	0	0	0	0	0	0
210	'Orbital area'	4	0	0	0	0	0	4	25	15	0	40	19	0	0	19	24	0	0	24
211	'Orbital area, lateral part'	3	0	0	0	0	0	3	18	9	0	27	13	0	0	13	14	0	0	14
212	'Orbital area, lateral part, layer 1'	0	0	0	0	0	0	0	3	0	0	3	3	0	0	3	3	0	0	3
213	'Orbital area, lateral part, layer 2/3'	0	0	0	0	0	0	0	5	3	0	8	3	0	0	3	3	0	0	3
214	'Orbital area, lateral part, layer 5'	3	0	0	0	0	0	3	11	5	0	16	5	0	0	5	5	0	0	5
215	'Orbital area, lateral part, layer 6a'	0	0	0	0	0	0	0	3	3	0	6	4	0	0	4	3	0	0	3
216	'Orbital area, lateral part, layer 6b'	3	0	0	0	0	0	3	0	0	0	0	0	0	0	0	4	0	0	4
217	'Orbital area, medial part'	0	0	0	0	0	0	0	3	4	0	7	3	0	0	3	5	0	0	5
218	'Orbital area, medial part, layer 1'	0	0	0	0	0	0	0	0	0	0	0	0	0	0	0	0	0	0	0
219	'Orbital area, medial part, layer 2/3'	0	0	0	0	0	0	0	0	3	0	3	3	0	0	3	0	0	0	0
220	'Orbital area, medial part, layer 5'	0	0	0	0	0	0	0	3	3	0	6	3	0	0	3	3	0	0	3
221	'Orbital area, medial part, layer 6a'	0	0	0	0	0	0	0	0	3	0	3	0	0	0	0	3	0	0	3
222	'Orbital area, medial part, layer 6b'	0	0	0	0	0	0	0	0	0	0	0	0	0	0	0	0	0	0	0
223	'Orbital area, ventrolateral part'	3	0	0	0	0	0	3	4	3	0	7	3	0	0	3	5	0	0	5
224	'Orbital area, ventrolateral part, layer 1'	0	0	0	0	0	0	0	0	0	0	0	3	0	0	3	0	0	0	0
225	'Orbital area, ventrolateral part, layer 2/3'	0	0	0	0	0	0	0	3	0	0	3	0	0	0	0	0	0	0	0
226	'Orbital area, ventrolateral part, layer 5'	3	0	0	0	0	0	3	0	3	0	3	3	0	0	3	5	0	0	5
227	'Orbital area, ventrolateral part, layer 6a'	0	0	0	0	0	0	0	3	3	0	6	0	0	0	0	0	0	0	0
228	'Orbital area, ventrolateral part, layer 6b'	0	0	0	0	0	0	0	0	0	0	0	0	0	0	0	0	0	0	0
229	'Agranular insular area'	5	42	4	0	0	0	51	20	230	15	265	68	16	0	84	146	7	0	153
230	'Agranular insular area, dorsal part'	3	11	0	0	0	0	14	17	59	0	76	11	0	0	11	26	0	0	26
231	'Agranular insular area, dorsal part, layer 1'	0	0	0	0	0	0	0	3	3	0	6	0	0	0	0	0	0	0	0
232	'Agranular insular area, dorsal part, layer 2/3'	3	0	0	0	0	0	3	6	5	0	11	0	0	0	0	0	0	0	0
233	'Agranular insular area, dorsal part, layer 5'	3	0	0	0	0	0	3	8	34	0	42	6	0	0	6	6	0	0	6
234	'Agranular insular area, dorsal part, layer 6a'	0	10	0	0	0	0	10	3	19	0	22	4	0	0	4	18	0	0	18
235	'Agranular insular area, dorsal part, layer 6b'	0	3	0	0	0	0	3	0	0	0	0	3	0	0	3	3	0	0	3
236	'Agranular insular area, posterior part'	3	21	4	0	0	0	28	0	19	15	34	30	16	0	46	7	7	0	14
237	'Agranular insular area, posterior part, layer 1'	0	0	0	0	0	0	0	0	0	0	0	0	0	0	0	0	3	0	3
238	'Agranular insular area, posterior part, layer 2/3'	0	3	3	0	0	0	6	0	7	4	11	9	3	0	12	3	3	0	6
239	'Agranular insular area, posterior part, layer 5'	3	7	3	0	0	0	13	0	7	8	15	6	7	0	13	3	3	0	6
240	'Agranular insular area, posterior part, layer 6a'	0	13	3	0	0	0	16	0	5	3	8	15	7	0	22	4	3	0	7
241	'Agranular insular area, posterior part, layer 6b'	0	0	0	0	0	0	0	0	0	0	0	0	0	0	0	0	0	0	0
242	'Agranular insular area, ventral part'	3	10	0	0	0	0	13	3	152	0	155	27	0	0	27	113	0	0	113
243	'Agranular insular area, ventral part, layer 1'	0	0	0	0	0	0	0	0	0	0	0	0	0	0	0	0	0	0	0
244	'Agranular insular area, ventral part, layer 2/3'	0	3	0	0	0	0	3	0	34	0	34	8	0	0	8	4	0	0	4
245	'Agranular insular area, ventral part, layer 5'	3	3	0	0	0	0	6	3	80	0	83	18	0	0	18	70	0	0	70
246	'Agranular insular area, ventral part, layer 6a'	0	8	0	0	0	0	8	0	38	0	38	3	0	0	3	39	0	0	39
247	'Agranular insular area, ventral part, layer 6b'	0	0	0	0	0	0	0	0	0	0	0	0	0	0	0	0	0	0	0
248	'Retrosplenial area'	0	0	0	3	5	3	11	0	0	0	0	0	3	0	3	0	3	0	3
249	'Retrosplenial area, lateral agranular part'	0	0	0	0	3	3	6	0	0	0	0	0	3	0	3	0	0	0	0
250	'Retrosplenial area, lateral agranular part, layer 1'	0	0	0	0	0	0	0	0	0	0	0	0	0	0	0	0	0	0	0
251	'Retrosplenial area, lateral agranular part, layer 2/3'	0	0	0	0	0	0	0	0	0	0	0	0	0	0	0	0	0	0	0
252	'Retrosplenial area, lateral agranular part, layer 5'	0	0	0	0	3	0	3	0	0	0	0	0	0	0	0	0	0	0	0
253	'Retrosplenial area, lateral agranular part, layer 6a'	0	0	0	0	3	3	6	0	0	0	0	0	3	0	3	0	0	0	0
254	'Retrosplenial area, lateral agranular part, layer 6b'	0	0	0	0	0	0	0	0	0	0	0	0	0	0	0	0	0	0	0
255	'Mediomedial anterior visual area'	0	0	0	0	0	0	0	0	0	0	0	0	0	0	0	0	0	0	0
256	'Mediomedial posterior visual area'	0	0	0	0	0	0	0	0	0	0	0	0	0	0	0	0	0	0	0
257	'Medial visual area'	0	0	0	0	0	0	0	0	0	0	0	0	0	0	0	0	0	0	0
258	'Retrosplenial area, dorsal part'	0	0	0	0	3	3	6	0	0	0	0	0	3	0	3	0	3	0	3
259	'Retrosplenial area, dorsal part, layer 1'	0	0	0	0	0	0	0	0	0	0	0	0	0	0	0	0	0	0	0
260	'Retrosplenial area, dorsal part, layer 2/3'	0	0	0	0	0	3	3	0	0	0	0	0	0	0	0	0	0	0	0
261	'Retrosplenial area, dorsal part, layer 5'	0	0	0	0	3	0	3	0	0	0	0	0	3	0	3	0	3	0	3
262	'Retrosplenial area, dorsal part, layer 6a'	0	0	0	0	0	0	0	0	0	0	0	0	0	0	0	0	0	0	0
263	'Retrosplenial area, dorsal part, layer 6b'	0	0	0	0	0	0	0	0	0	0	0	0	0	0	0	0	0	0	0
264	'Retrosplenial area, ventral part'	0	0	0	3	3	0	6	0	0	0	0	0	3	0	3	0	0	0	0
265	'Retrosplenial area, ventral part, layer 1'	0	0	0	0	0	0	0	0	0	0	0	0	3	0	3	0	0	0	0
266	'Retrosplenial area, ventral part, layer 2/3'	0	0	0	0	0	0	0	0	0	0	0	0	0	0	0	0	0	0	0
267	'Retrosplenial area, ventral part, layer 5'	0	0	0	3	0	0	3	0	0	0	0	0	0	0	0	0	0	0	0
268	'Retrosplenial area, ventral part, layer 6a'	0	0	0	0	3	0	3	0	0	0	0	0	0	0	0	0	0	0	0
269	'Retrosplenial area, ventral part, layer 6b'	0	0	0	0	0	0	0	0	0	0	0	0	0	0	0	0	0	0	0
270	'Posterior parietal association areas'	0	0	0	0	3	0	3	0	0	0	0	0	3	0	3	0	0	0	0
271	'Anterior area'	0	0	0	0	3	0	3	0	0	0	0	0	3	0	3	0	0	0	0
272	'Anterior area, layer 1'	0	0	0	0	0	0	0	0	0	0	0	0	3	0	3	0	0	0	0
273	'Anterior area, layer 2/3'	0	0	0	0	0	0	0	0	0	0	0	0	0	0	0	0	0	0	0
274	'Anterior area, layer 4'	0	0	0	0	3	0	3	0	0	0	0	0	0	0	0	0	0	0	0
275	'Anterior area, layer 5'	0	0	0	0	0	0	0	0	0	0	0	0	0	0	0	0	0	0	0
276	'Anterior area, layer 6a'	0	0	0	0	0	0	0	0	0	0	0	0	0	0	0	0	0	0	0
277	'Anterior area, layer 6b'	0	0	0	0	0	0	0	0	0	0	0	0	0	0	0	0	0	0	0
278	'Rostrolateral visual area'	0	0	0	0	3	0	3	0	0	0	0	0	3	0	3	0	0	0	0
279	'Rostrolateral area, layer 1'	0	0	0	0	0	0	0	0	0	0	0	0	3	0	3	0	0	0	0
280	'Rostrolateral area, layer 2/3'	0	0	0	0	3	0	3	0	0	0	0	0	0	0	0	0	0	0	0
281	'Rostrolateral area, layer 4'	0	0	0	0	0	0	0	0	0	0	0	0	0	0	0	0	0	0	0
282	'Rostrolateral area, layer 5'	0	0	0	0	0	0	0	0	0	0	0	0	0	0	0	0	0	0	0
283	'Rostrolateral area, layer 6a'	0	0	0	0	0	0	0	0	0	0	0	0	0	0	0	0	0	0	0
284	'Rostrolateral area, layer 6b'	0	0	0	0	0	0	0	0	0	0	0	0	0	0	0	0	0	0	0
285	'Temporal association areas'	0	0	0	0	3	0	3	0	0	3	3	0	4	0	4	0	0	0	0
286	'Temporal association areas, layer 1'	0	0	0	0	0	0	0	0	0	0	0	0	3	0	3	0	0	0	0
287	'Temporal association areas, layer 2/3'	0	0	0	0	0	0	0	0	0	0	0	0	3	0	3	0	0	0	0
288	'Temporal association areas, layer 4'	0	0	0	0	0	0	0	0	0	0	0	0	0	0	0	0	0	0	0
289	'Temporal association areas, layer 5'	0	0	0	0	3	0	3	0	0	3	3	0	0	0	0	0	0	0	0
290	'Temporal association areas, layer 6a'	0	0	0	0	0	0	0	0	0	0	0	0	0	0	0	0	0	0	0
291	'Temporal association areas, layer 6b'	0	0	0	0	0	0	0	0	0	0	0	0	0	0	0	0	0	0	0
292	'Perirhinal area'	0	0	0	3	3	0	6	0	0	0	0	0	4	0	4	0	0	3	3
293	'Perirhinal area, layer 1'	0	0	0	0	0	0	0	0	0	0	0	0	0	0	0	0	0	3	3
294	'Perirhinal area, layer 2/3'	0	0	0	3	0	0	3	0	0	0	0	0	4	0	4	0	0	3	3
295	'Perirhinal area, layer 5'	0	0	0	3	3	0	6	0	0	0	0	0	0	0	0	0	0	3	3
296	'Perirhinal area, layer 6a'	0	0	0	0	0	0	0	0	0	0	0	0	0	0	0	0	0	0	0
297	'Perirhinal area, layer 6b'	0	0	0	0	0	0	0	0	0	0	0	0	0	0	0	0	0	0	0
298	'Ectorhinal area'	0	0	0	4	4	0	8	0	0	0	0	0	3	0	3	0	0	3	3
299	'Ectorhinal area/Layer 1'	0	0	0	0	3	0	3	0	0	0	0	0	0	0	0	0	0	3	3
300	'Ectorhinal area/Layer 2/3'	0	0	0	0	3	0	3	0	0	0	0	0	0	0	0	0	0	0	0
301	'Ectorhinal area/Layer 5'	0	0	0	3	3	0	6	0	0	0	0	0	0	0	0	0	0	0	0
302	'Ectorhinal area/Layer 6a'	0	0	0	3	3	0	6	0	0	0	0	0	3	0	3	0	0	0	0
303	'Ectorhinal area/Layer 6b'	0	0	0	0	0	0	0	0	0	0	0	0	0	0	0	0	0	0	0
304	'Olfactory areas'	68	189	116	19	13	0	405	21	237	48	306	582	146	3	731	348	79	16	443
305	'Main olfactory bulb'	0	0	0	0	0	0	0	0	0	0	0	0	0	0	0	0	0	0	0
306	'Accessory olfactory bulb'	0	0	0	0	0	0	0	0	0	0	0	0	0	0	0	0	0	0	0
307	'Accessory olfactory bulb, glomerular layer'	0	0	0	0	0	0	0	0	0	0	0	0	0	0	0	0	0	0	0
308	'Accessory olfactory bulb, granular layer'	0	0	0	0	0	0	0	0	0	0	0	0	0	0	0	0	0	0	0
309	'Accessory olfactory bulb, mitral layer'	0	0	0	0	0	0	0	0	0	0	0	0	0	0	0	0	0	0	0
310	'Anterior olfactory nucleus'	3	0	0	0	0	0	3	13	0	0	13	37	0	0	37	134	0	0	134
311	'Taenia tecta'	3	0	0	0	0	0	3	5	0	0	5	4	0	0	4	6	0	0	6
312	'Taenia tecta, dorsal part'	3	0	0	0	0	0	3	0	0	0	0	3	0	0	3	3	0	0	3
313	'Taenia tecta, ventral part'	0	0	0	0	0	0	0	5	0	0	5	3	0	0	3	3	0	0	3
314	'Dorsal peduncular area'	0	0	0	0	0	0	0	0	3	0	3	0	0	0	0	0	0	0	0
315	'Piriform area'	53	165	93	14	5	0	330	0	199	24	223	443	94	0	537	153	55	0	208
316	'Nucleus of the lateral olfactory tract'	0	0	5	0	0	0	5	0	4	0	4	3	5	0	8	3	3	0	6
317	'Nucleus of the lateral olfactory tract, molecular layer'	0	0	0	0	0	0	0	0	3	0	3	3	0	0	3	0	0	0	0
318	'Nucleus of the lateral olfactory tract, pyramidal layer'	0	0	4	0	0	0	4	0	3	0	3	3	5	0	8	3	3	0	6
319	'Nucleus of the lateral olfactory tract, layer 3'	0	0	3	0	0	0	3	0	3	0	3	0	0	0	0	0	3	0	3
320	'Cortical amygdalar area'	0	0	6	4	3	0	13	0	3	11	14	12	23	0	35	3	14	0	17
321	'Cortical amygdalar area, anterior part'	0	0	6	0	0	0	6	0	3	0	3	12	3	0	15	3	4	0	7
322	'Cortical amygdalar area, posterior part'	0	0	0	4	3	0	7	0	0	11	11	0	22	0	22	0	10	0	10
323	'Cortical amygdalar area, posterior part, lateral zone'	0	0	0	3	0	0	3	0	0	3	3	0	15	0	15	0	9	0	9
324	'Cortical amygdalar area, posterior part, medial zone'	0	0	0	3	3	0	6	0	0	8	8	0	7	0	7	0	3	0	3
325	'Piriform-amygdalar area'	0	3	3	3	0	0	9	0	3	8	11	23	10	0	33	0	6	0	6
326	'Postpiriform transition area'	0	0	0	0	7	0	7	0	0	5	5	0	14	3	17	0	0	15	15
327	'Hippocampal formation'	0	0	0	14	24	8	46	0	0	28	28	0	36	34	70	0	4	34	38
328	'Hippocampal region'	0	0	0	0	16	0	16	0	0	7	7	0	6	24	30	0	0	4	4
329	'Ammon''s horn'	0	0	0	0	15	0	15	0	0	7	7	0	6	17	23	0	0	3	3
330	'Field CA1'	0	0	0	0	5	0	5	0	0	7	7	0	5	4	9	0	0	3	3
331	'Field CA2'	0	0	0	0	0	0	0	0	0	0	0	0	0	0	0	0	0	0	0
332	'Field CA3'	0	0	0	0	10	0	10	0	0	0	0	0	3	13	16	0	0	0	0
333	'Dentate gyrus'	0	0	0	0	3	0	3	0	0	0	0	0	0	7	7	0	0	3	3
334	'Dentate gyrus, molecular layer'	0	0	0	0	3	0	3	0	0	0	0	0	0	7	7	0	0	3	3
335	'Dentate gyrus, polymorph layer'	0	0	0	0	0	0	0	0	0	0	0	0	0	0	0	0	0	0	0
336	'Dentate gyrus, granule cell layer'	0	0	0	0	0	0	0	0	0	0	0	0	0	0	0	0	0	0	0
337	'Dentate gyrus crest'	0	0	0	0	0	0	0	0	0	0	0	0	0	0	0	0	0	0	0
338	'Dentate gyrus lateral blade'	0	0	0	0	0	0	0	0	0	0	0	0	0	0	0	0	0	0	0
339	'Dentate gyrus medial blade'	0	0	0	0	0	0	0	0	0	0	0	0	0	0	0	0	0	0	0
340	'Fasciola cinerea'	0	0	0	0	0	0	0	0	0	0	0	0	0	0	0	0	0	0	0
341	'Induseum griseum'	0	0	0	0	0	0	0	0	0	0	0	0	0	0	0	0	0	0	0
342	'Retrohippocampal region'	0	0	0	14	8	8	30	0	0	21	21	0	30	10	40	0	4	30	34
343	'Entorhinal area'	0	0	0	14	8	7	29	0	0	21	21	0	30	7	37	0	4	28	32
344	'Entorhinal area, lateral part'	0	0	0	14	8	3	25	0	0	21	21	0	30	7	37	0	4	25	29
345	'Entorhinal area, lateral part, layer 1'	0	0	0	3	0	0	3	0	0	3	3	0	7	0	7	0	0	0	0
346	'Entorhinal area, lateral part, layer 2'	0	0	0	4	3	0	7	0	0	4	4	0	15	0	15	0	0	10	10
347	'Entorhinal area, lateral part, layer 3'	0	0	0	3	3	3	9	0	0	3	3	0	5	3	8	0	0	7	7
348	'Entorhinal area, lateral part, layer 5'	0	0	0	5	3	0	8	0	0	10	10	0	3	3	6	0	3	8	11
349	'Entorhinal area, lateral part, layer 6a'	0	0	0	3	3	0	6	0	0	3	3	0	0	3	3	0	3	0	3
350	'Entorhinal area, medial part, dorsal zone'	0	0	0	0	0	6	6	0	0	0	0	0	0	0	0	0	0	3	3
351	'Entorhinal area, medial part, dorsal zone, layer 1'	0	0	0	0	0	3	3	0	0	0	0	0	0	0	0	0	0	3	3
352	'Entorhinal area, medial part, dorsal zone, layer 2'	0	0	0	0	0	3	3	0	0	0	0	0	0	0	0	0	0	3	3
353	'Entorhinal area, medial part, dorsal zone, layer 3'	0	0	0	0	0	0	0	0	0	0	0	0	0	0	0	0	0	3	3
354	'Entorhinal area, medial part, dorsal zone, layer 5'	0	0	0	0	0	3	3	0	0	0	0	0	0	0	0	0	0	0	0
355	'Entorhinal area, medial part, dorsal zone, layer 6'	0	0	0	0	0	0	0	0	0	0	0	0	0	0	0	0	0	0	0
356	'Entorhinal area, medial part, ventral zone'	0	0	0	0	0	0	0	0	0	0	0	0	0	0	0	0	0	0	0
357	'Parasubiculum'	0	0	0	0	0	0	0	0	0	0	0	0	0	0	0	0	0	0	0
358	'Postsubiculum'	0	0	0	0	0	0	0	0	0	0	0	0	0	0	0	0	0	0	0
359	'Presubiculum'	0	0	0	0	0	3	3	0	0	0	0	0	0	0	0	0	0	0	0
360	'Subiculum'	0	0	0	0	0	0	0	0	0	0	0	0	0	3	3	0	0	0	0
361	'Subiculum, dorsal part'	0	0	0	0	0	0	0	0	0	0	0	0	0	0	0	0	0	0	0
362	'Subiculum, ventral part'	0	0	0	0	0	0	0	0	0	0	0	0	0	0	0	0	0	0	0
363	'Prosubiculum'	0	0	0	0	0	0	0	0	0	0	0	0	0	0	0	0	0	3	3
364	'Prosubiculum, dorsal part'	0	0	0	0	0	0	0	0	0	0	0	0	0	0	0	0	0	0	0
365	'Prosubiculum, ventral part'	0	0	0	0	0	0	0	0	0	0	0	0	0	0	0	0	0	0	0
366	'Hippocampo-amygdalar transition area'	0	0	0	0	0	0	0	0	0	0	0	0	0	0	0	0	0	0	0
367	'Area prostriata'	0	0	0	0	0	0	0	0	0	0	0	0	0	0	0	0	0	0	0
368	'Cortical subplate'	26	201	94	32	4	0	357	0	152	32	184	256	117	0	373	222	54	3	279
369	'Claustrum'	6	72	0	0	0	0	78	0	50	0	50	46	0	0	46	68	0	0	68
370	'Endopiriform nucleus'	16	114	71	6	3	0	210	0	95	9	104	170	53	0	223	139	37	3	179
371	'Endopiriform nucleus, dorsal part'	16	101	49	3	3	0	172	0	90	6	96	140	37	0	177	137	30	0	167
372	'Endopiriform nucleus, ventral part'	0	13	22	4	3	0	42	0	5	3	8	30	16	0	46	3	7	3	13
373	'Lateral amygdalar nucleus'	0	0	0	9	0	0	9	0	0	0	0	0	5	0	5	0	5	0	5
374	'Basolateral amygdalar nucleus'	0	0	5	12	3	0	20	0	3	16	19	9	38	0	47	0	8	0	8
375	'Basolateral amygdalar nucleus, anterior part'	0	0	5	0	0	0	5	0	3	7	10	9	27	0	36	0	6	0	6
376	'Basolateral amygdalar nucleus, posterior part'	0	0	0	9	3	0	12	0	0	5	5	0	3	0	3	0	3	0	3
377	'Basolateral amygdalar nucleus, ventral part'	0	0	0	3	0	0	3	0	0	4	4	0	8	0	8	0	0	0	0
378	'Basomedial amygdalar nucleus'	0	0	9	3	0	0	12	0	4	5	9	7	13	0	20	0	4	0	4
379	'Basomedial amygdalar nucleus, anterior part'	0	0	9	0	0	0	9	0	4	3	7	7	6	0	13	0	4	0	4
380	'Basomedial amygdalar nucleus, posterior part'	0	0	0	3	0	0	3	0	0	4	4	0	7	0	7	0	0	0	0
381	'Posterior amygdalar nucleus'	0	0	0	3	0	0	3	0	0	0	0	0	3	0	3	0	0	0	0
382	'Cerebral nuclei'	84	149	96	3	0	0	332	0	145	4	149	248	70	0	318	252	33	0	285
383	'Striatum'	74	109	88	3	0	0	274	0	120	4	124	220	56	0	276	209	29	0	238
384	'Striatum dorsal region'	45	63	65	0	0	0	173	0	88	0	88	117	33	0	150	128	11	0	139
385	'Caudoputamen'	45	63	65	0	0	0	173	0	88	0	88	117	33	0	150	128	11	0	139
386	'Striatum ventral region'	27	34	0	0	0	0	61	0	14	0	14	37	0	0	37	60	0	0	60
387	'Nucleus accumbens'	23	14	0	0	0	0	37	0	9	0	9	7	0	0	7	35	0	0	35
388	'Fundus of striatum'	0	8	0	0	0	0	8	0	4	0	4	10	0	0	10	4	0	0	4
389	'Olfactory tubercle'	4	12	0	0	0	0	16	0	3	0	3	20	0	0	20	21	0	0	21
390	'Lateral septal complex'	0	0	0	0	0	0	0	0	7	0	7	3	0	0	3	0	0	0	0
391	'Lateral septal nucleus'	0	0	0	0	0	0	0	0	6	0	6	3	0	0	3	0	0	0	0
392	'Lateral septal nucleus, caudal (caudodorsal) part'	0	0	0	0	0	0	0	0	4	0	4	3	0	0	3	0	0	0	0
393	'Lateral septal nucleus, rostral (rostroventral) part'	0	0	0	0	0	0	0	0	3	0	3	3	0	0	3	0	0	0	0
394	'Lateral septal nucleus, ventral part'	0	0	0	0	0	0	0	0	0	0	0	0	0	0	0	0	0	0	0
395	'Septofimbrial nucleus'	0	0	0	0	0	0	0	0	3	0	3	0	0	0	0	0	0	0	0
396	'Septohippocampal nucleus'	0	0	0	0	0	0	0	0	0	0	0	0	0	0	0	0	0	0	0
397	'Striatum-like amygdalar nuclei'	0	4	15	3	0	0	22	0	6	4	10	22	15	0	37	6	16	0	22
398	'Anterior amygdalar area'	0	4	3	0	0	0	7	0	0	0	0	18	3	0	21	4	0	0	4
399	'Bed nucleus of the accessory olfactory tract'	0	0	0	0	0	0	0	0	0	0	0	0	0	0	0	0	0	0	0
400	'Central amygdalar nucleus'	0	0	5	3	0	0	8	0	3	0	3	0	4	0	4	0	8	0	8
401	'Central amygdalar nucleus, capsular part'	0	0	3	0	0	0	3	0	0	0	0	0	0	0	0	0	5	0	5
402	'Central amygdalar nucleus, lateral part'	0	0	0	0	0	0	0	0	0	0	0	0	0	0	0	0	3	0	3
403	'Central amygdalar nucleus, medial part'	0	0	4	3	0	0	7	0	3	0	3	0	4	0	4	0	3	0	3
404	'Intercalated amygdalar nucleus'	0	0	7	0	0	0	7	0	3	3	6	3	3	0	6	3	3	0	6
405	'Medial amygdalar nucleus'	0	0	3	3	0	0	6	0	3	3	6	3	7	0	10	3	7	0	10
406	'Medial amygdalar nucleus, posterodorsal part'	0	0	0	0	0	0	0	0	0	0	0	0	0	0	0	0	0	0	0
407	'Pallidum'	10	40	8	0	0	0	58	0	25	0	25	28	14	0	42	43	4	0	47
408	'Pallidum, dorsal region'	0	0	3	0	0	0	3	0	3	0	3	0	6	0	6	0	3	0	3
409	'Globus pallidus, external segment'	0	0	3	0	0	0	3	0	3	0	3	0	3	0	3	0	3	0	3
410	'Globus pallidus, internal segment'	0	0	0	0	0	0	0	0	0	0	0	0	3	0	3	0	0	0	0
411	'Pallidum, ventral region'	8	37	5	0	0	0	50	0	13	0	13	22	3	0	25	39	3	0	42
412	'Substantia innominata'	8	28	3	0	0	0	39	0	13	0	13	18	3	0	21	34	3	0	37
413	'Magnocellular nucleus'	0	9	3	0	0	0	12	0	0	0	0	4	0	0	4	5	0	0	5
414	'Pallidum, medial region'	3	3	0	0	0	0	6	0	5	0	5	3	0	0	3	3	0	0	3
415	'Medial septal complex'	3	3	0	0	0	0	6	0	0	0	0	3	0	0	3	3	0	0	3
416	'Medial septal nucleus'	0	0	0	0	0	0	0	0	0	0	0	3	0	0	3	0	0	0	0
417	'Diagonal band nucleus'	3	3	0	0	0	0	6	0	0	0	0	3	0	0	3	3	0	0	3
418	'Triangular nucleus of septum'	0	0	0	0	0	0	0	0	5	0	5	0	0	0	0	0	0	0	0
419	'Pallidum, caudal region'	0	3	0	0	0	0	3	0	3	0	3	0	0	0	0	0	0	0	0
420	'Bed nuclei of the stria terminalis'	0	3	0	0	0	0	3	0	3	0	3	0	0	0	0	0	0	0	0
421	'Bed nuclei of the stria terminalis, anterior division'	0	0	0	0	0	0	0	0	0	0	0	0	0	0	0	0	0	0	0
422	'Bed nuclei of the stria terminalis, posterior division'	0	0	0	0	0	0	0	0	0	0	0	0	0	0	0	0	0	0	0
423	'Bed nucleus of the anterior commissure'	0	0	0	0	0	0	0	0	0	0	0	0	0	0	0	0	0	0	0
424	'Brain stem'	0	0	12	18	7	10	47	0	9	67	76	12	32	9	53	3	35	9	47
425	'Interbrain'	0	0	12	18	4	0	34	0	9	61	70	12	29	0	41	3	34	3	40
426	'Thalamus'	0	0	3	11	4	0	18	0	4	44	48	3	11	0	14	0	9	3	12
427	'Thalamus, sensory-motor cortex related'	0	0	0	3	3	0	6	0	3	4	7	0	3	0	3	0	0	3	3
428	'Ventral group of the dorsal thalamus'	0	0	0	3	3	0	6	0	3	3	6	0	0	0	0	0	0	3	3
429	'Ventral anterior-lateral complex of the thalamus'	0	0	0	0	0	0	0	0	0	3	3	0	0	0	0	0	0	0	0
430	'Ventral medial nucleus of the thalamus'	0	0	0	0	0	0	0	0	3	3	6	0	0	0	0	0	0	0	0
431	'Ventral posterior complex of the thalamus'	0	0	0	3	3	0	6	0	0	0	0	0	0	0	0	0	0	0	0
432	'Ventral posterolateral nucleus of the thalamus'	0	0	0	0	0	0	0	0	0	0	0	0	0	0	0	0	0	0	0
433	'Ventral posterolateral nucleus of the thalamus, parvicellular part'	0	0	0	3	0	0	3	0	0	0	0	0	0	0	0	0	0	0	0
434	'Ventral posteromedial nucleus of the thalamus'	0	0	0	0	3	0	3	0	0	0	0	0	0	0	0	0	0	0	0
435	'Ventral posteromedial nucleus of the thalamus, parvicellular part'	0	0	0	0	0	0	0	0	0	0	0	0	0	0	0	0	0	0	0
436	'Posterior triangular thalamic nucleus'	0	0	0	0	0	0	0	0	0	0	0	0	0	0	0	0	0	3	3
437	'Subparafascicular nucleus'	0	0	0	0	0	0	0	0	0	0	0	0	0	0	0	0	0	0	0
438	'Subparafascicular nucleus, magnocellular part'	0	0	0	0	0	0	0	0	0	0	0	0	0	0	0	0	0	0	0
439	'Subparafascicular nucleus, parvicellular part'	0	0	0	0	0	0	0	0	0	0	0	0	0	0	0	0	0	0	0
440	'Subparafascicular area'	0	0	0	0	0	0	0	0	0	3	3	0	3	0	3	0	0	0	0
441	'Peripeduncular nucleus'	0	0	0	0	0	0	0	0	0	0	0	0	0	0	0	0	0	0	0
442	'Geniculate group, dorsal thalamus'	0	0	0	0	3	0	3	0	0	0	0	0	0	0	0	0	0	0	0
443	'Medial geniculate complex'	0	0	0	0	3	0	3	0	0	0	0	0	0	0	0	0	0	0	0
444	'Medial geniculate complex, dorsal part'	0	0	0	0	0	0	0	0	0	0	0	0	0	0	0	0	0	0	0
445	'Medial geniculate complex, ventral part'	0	0	0	0	0	0	0	0	0	0	0	0	0	0	0	0	0	0	0
446	'Medial geniculate complex, medial part'	0	0	0	0	3	0	3	0	0	0	0	0	0	0	0	0	0	0	0
447	'Dorsal part of the lateral geniculate complex'	0	0	0	0	0	0	0	0	0	0	0	0	0	0	0	0	0	0	0
448	'Dorsal part of the lateral geniculate complex, shell'	0	0	0	0	0	0	0	0	0	0	0	0	0	0	0	0	0	0	0
449	'Dorsal part of the lateral geniculate complex, core'	0	0	0	0	0	0	0	0	0	0	0	0	0	0	0	0	0	0	0
450	'Dorsal part of the lateral geniculate complex, ipsilateral zone'	0	0	0	0	0	0	0	0	0	0	0	0	0	0	0	0	0	0	0
451	'Thalamus, polymodal association cortex related'	0	0	3	10	3	0	16	0	3	38	41	3	10	0	13	0	8	0	8
452	'Lateral group of the dorsal thalamus'	0	0	0	3	0	0	3	0	0	0	0	0	3	0	3	0	0	0	0
453	'Lateral posterior nucleus of the thalamus'	0	0	0	0	0	0	0	0	0	0	0	0	3	0	3	0	0	0	0
454	'Posterior complex of the thalamus'	0	0	0	3	0	0	3	0	0	0	0	0	3	0	3	0	0	0	0
455	'Posterior limiting nucleus of the thalamus'	0	0	0	0	0	0	0	0	0	0	0	0	0	0	0	0	0	0	0
456	'Suprageniculate nucleus'	0	0	0	0	0	0	0	0	0	0	0	0	0	0	0	0	0	0	0
457	'Ethmoid nucleus of the thalamus'	0	0	0	0	0	0	0	0	0	0	0	0	0	0	0	0	0	0	0
458	'Anterior group of the dorsal thalamus'	0	0	0	0	0	0	0	0	3	0	3	3	3	0	6	0	3	0	3
459	'Anteroventral nucleus of thalamus'	0	0	0	0	0	0	0	0	0	0	0	0	0	0	0	0	0	0	0
460	'Anteromedial nucleus'	0	0	0	0	0	0	0	0	3	0	3	3	3	0	6	0	0	0	0
461	'Anteromedial nucleus, dorsal part'	0	0	0	0	0	0	0	0	0	0	0	3	3	0	6	0	0	0	0
462	'Anteromedial nucleus, ventral part'	0	0	0	0	0	0	0	0	3	0	3	0	0	0	0	0	0	0	0
463	'Anterodorsal nucleus'	0	0	0	0	0	0	0	0	0	0	0	0	0	0	0	0	3	0	3
464	'Interanteromedial nucleus of the thalamus'	0	0	0	0	0	0	0	0	0	0	0	0	0	0	0	0	0	0	0
465	'Interanterodorsal nucleus of the thalamus'	0	0	0	0	0	0	0	0	0	0	0	0	0	0	0	0	0	0	0
466	'Lateral dorsal nucleus of thalamus'	0	0	0	0	0	0	0	0	0	0	0	0	0	0	0	0	0	0	0
467	'Medial group of the dorsal thalamus'	0	0	0	3	0	0	3	0	0	21	21	0	3	0	3	0	3	0	3
468	'Intermediodorsal nucleus of the thalamus'	0	0	0	0	0	0	0	0	0	4	4	0	0	0	0	0	3	0	3
469	'Mediodorsal nucleus of thalamus'	0	0	0	3	0	0	3	0	0	13	13	0	3	0	3	0	3	0	3
470	'Submedial nucleus of the thalamus'	0	0	0	0	0	0	0	0	0	3	3	0	0	0	0	0	0	0	0
471	'Perireunensis nucleus'	0	0	0	0	0	0	0	0	0	3	3	0	0	0	0	0	0	0	0
472	'Midline group of the dorsal thalamus'	0	0	3	3	0	0	6	0	3	9	12	0	3	0	3	0	3	0	3
473	'Paraventricular nucleus of the thalamus'	0	0	3	3	0	0	6	0	0	3	3	0	3	0	3	0	3	0	3
474	'Parataenial nucleus'	0	0	0	0	0	0	0	0	0	0	0	0	3	0	3	0	0	0	0
475	'Nucleus of reuniens'	0	0	0	0	0	0	0	0	3	6	9	0	0	0	0	0	3	0	3
476	'Xiphoid thalamic nucleus'	0	0	0	0	0	0	0	0	0	3	3	0	0	0	0	0	0	0	0
477	'Intralaminar nuclei of the dorsal thalamus'	0	0	0	3	0	0	3	0	0	7	7	0	0	0	0	0	3	0	3
478	'Rhomboid nucleus'	0	0	0	0	0	0	0	0	0	3	3	0	0	0	0	0	0	0	0
479	'Central medial nucleus of the thalamus'	0	0	0	0	0	0	0	0	0	4	4	0	0	0	0	0	0	0	0
480	'Paracentral nucleus'	0	0	0	0	0	0	0	0	0	0	0	0	0	0	0	0	0	0	0
481	'Central lateral nucleus of the thalamus'	0	0	0	0	0	0	0	0	0	0	0	0	0	0	0	0	0	0	0
482	'Parafascicular nucleus'	0	0	0	3	0	0	3	0	0	3	3	0	0	0	0	0	3	0	3
483	'Posterior intralaminar thalamic nucleus'	0	0	0	0	0	0	0	0	0	3	3	0	0	0	0	0	0	0	0
484	'Reticular nucleus of the thalamus'	0	0	0	3	0	0	3	0	3	0	3	3	3	0	6	0	0	0	0
485	'Geniculate group, ventral thalamus'	0	0	0	0	3	0	3	0	0	0	0	0	0	0	0	0	0	0	0
486	'Intergeniculate leaflet of the lateral geniculate complex'	0	0	0	0	0	0	0	0	0	0	0	0	0	0	0	0	0	0	0
487	'Intermediate geniculate nucleus'	0	0	0	0	0	0	0	0	0	0	0	0	0	0	0	0	0	0	0
488	'Ventral part of the lateral geniculate complex'	0	0	0	0	3	0	3	0	0	0	0	0	0	0	0	0	0	0	0
489	'Subgeniculate nucleus'	0	0	0	0	0	0	0	0	0	0	0	0	0	0	0	0	0	0	0
490	'Epithalamus'	0	0	0	0	0	0	0	0	0	3	3	0	0	0	0	0	0	0	0
491	'Medial habenula'	0	0	0	0	0	0	0	0	0	0	0	0	0	0	0	0	0	0	0
492	'Lateral habenula'	0	0	0	0	0	0	0	0	0	3	3	0	0	0	0	0	0	0	0
493	'Hypothalamus'	0	0	9	7	0	0	16	0	5	17	22	10	18	0	28	3	25	3	31
494	'Periventricular zone'	0	0	0	0	0	0	0	0	0	3	3	3	3	0	6	0	3	0	3
495	'Supraoptic nucleus'	0	0	0	0	0	0	0	0	0	0	0	3	3	0	6	0	0	0	0
496	'Accessory supraoptic group'	0	0	0	0	0	0	0	0	0	0	0	0	0	0	0	0	0	0	0
497	'Paraventricular hypothalamic nucleus'	0	0	0	0	0	0	0	0	0	0	0	0	0	0	0	0	3	0	3
498	'Paraventricular hypothalamic nucleus, magnocellular division'	0	0	0	0	0	0	0	0	0	0	0	0	0	0	0	0	0	0	0
499	'Paraventricular hypothalamic nucleus, magnocellular division, posterior magnocellular part'	0	0	0	0	0	0	0	0	0	0	0	0	0	0	0	0	0	0	0
500	'Paraventricular hypothalamic nucleus, parvicellular division'	0	0	0	0	0	0	0	0	0	0	0	0	0	0	0	0	0	0	0
501	'Periventricular hypothalamic nucleus, anterior part'	0	0	0	0	0	0	0	0	0	0	0	0	0	0	0	0	0	0	0
502	'Periventricular hypothalamic nucleus, intermediate part'	0	0	0	0	0	0	0	0	0	0	0	0	0	0	0	0	0	0	0
503	'Arcuate hypothalamic nucleus'	0	0	0	0	0	0	0	0	0	3	3	0	0	0	0	0	0	0	0
504	'Periventricular region'	0	0	0	0	0	0	0	0	3	0	3	0	0	0	0	3	0	0	3
505	'Anterodorsal preoptic nucleus'	0	0	0	0	0	0	0	0	0	0	0	0	0	0	0	0	0	0	0
506	'Anteroventral preoptic nucleus'	0	0	0	0	0	0	0	0	0	0	0	0	0	0	0	0	0	0	0
507	'Anteroventral periventricular nucleus'	0	0	0	0	0	0	0	0	0	0	0	0	0	0	0	0	0	0	0
508	'Dorsomedial nucleus of the hypothalamus'	0	0	0	0	0	0	0	0	0	0	0	0	0	0	0	0	0	0	0
509	'Median preoptic nucleus'	0	0	0	0	0	0	0	0	0	0	0	0	0	0	0	0	0	0	0
510	'Medial preoptic area'	0	0	0	0	0	0	0	0	0	0	0	0	0	0	0	3	0	0	3
511	'Vascular organ of the lamina terminalis'	0	0	0	0	0	0	0	0	0	0	0	0	0	0	0	0	0	0	0
512	'Posterodorsal preoptic nucleus'	0	0	0	0	0	0	0	0	3	0	3	0	0	0	0	0	0	0	0
513	'Parastrial nucleus'	0	0	0	0	0	0	0	0	0	0	0	0	0	0	0	0	0	0	0
514	'Periventricular hypothalamic nucleus, posterior part'	0	0	0	0	0	0	0	0	0	0	0	0	0	0	0	0	0	0	0
515	'Periventricular hypothalamic nucleus, preoptic part'	0	0	0	0	0	0	0	0	0	0	0	0	0	0	0	0	0	0	0
516	'Subparaventricular zone'	0	0	0	0	0	0	0	0	0	0	0	0	0	0	0	0	0	0	0
517	'Suprachiasmatic nucleus'	0	0	0	0	0	0	0	0	0	0	0	0	0	0	0	0	0	0	0
518	'Subfornical organ'	0	0	0	0	0	0	0	0	0	0	0	0	0	0	0	0	0	0	0
519	'Ventromedial preoptic nucleus'	0	0	0	0	0	0	0	0	0	0	0	0	0	0	0	0	0	0	0
520	'Ventrolateral preoptic nucleus'	0	0	0	0	0	0	0	0	0	0	0	0	0	0	0	0	0	0	0
521	'Hypothalamic medial zone'	0	0	3	3	0	0	6	0	0	11	11	0	4	0	4	0	3	3	6
522	'Anterior hypothalamic nucleus'	0	0	0	0	0	0	0	0	0	0	0	0	0	0	0	0	0	0	0
523	'Mammillary body'	0	0	0	3	0	0	3	0	0	3	3	0	3	0	3	0	0	3	3
524	'Lateral mammillary nucleus'	0	0	0	0	0	0	0	0	0	0	0	0	0	0	0	0	0	0	0
525	'Medial mammillary nucleus'	0	0	0	0	0	0	0	0	0	0	0	0	0	0	0	0	0	3	3
526	'Medial mammillary nucleus, median part'	0	0	0	0	0	0	0	0	0	0	0	0	0	0	0	0	0	0	0
527	'Medial mammillary nucleus, lateral part'	0	0	0	0	0	0	0	0	0	0	0	0	0	0	0	0	0	3	3
528	'Medial mammillary nucleus, medial part'	0	0	0	0	0	0	0	0	0	0	0	0	0	0	0	0	0	0	0
529	'Medial mammillary nucleus, posterior part'	0	0	0	0	0	0	0	0	0	0	0	0	0	0	0	0	0	0	0
530	'Medial mammillary nucleus, dorsal part'	0	0	0	0	0	0	0	0	0	0	0	0	0	0	0	0	0	0	0
531	'Supramammillary nucleus'	0	0	0	3	0	0	3	0	0	0	0	0	3	0	3	0	0	0	0
532	'Tuberomammillary nucleus'	0	0	0	0	0	0	0	0	0	3	3	0	0	0	0	0	0	0	0
533	'Tuberomammillary nucleus, dorsal part'	0	0	0	0	0	0	0	0	0	0	0	0	0	0	0	0	0	0	0
534	'Tuberomammillary nucleus, ventral part'	0	0	0	0	0	0	0	0	0	3	3	0	0	0	0	0	0	0	0
535	'Medial preoptic nucleus'	0	0	0	0	0	0	0	0	0	0	0	0	0	0	0	0	0	0	0
536	'Dorsal premammillary nucleus'	0	0	0	0	0	0	0	0	0	0	0	0	0	0	0	0	0	0	0
537	'Ventral premammillary nucleus'	0	0	0	0	0	0	0	0	0	3	3	0	0	0	0	0	0	0	0
538	'Paraventricular hypothalamic nucleus, descending division'	0	0	3	0	0	0	3	0	0	4	4	0	0	0	0	0	0	0	0
539	'Ventromedial hypothalamic nucleus'	0	0	0	0	0	0	0	0	0	5	5	0	3	0	3	0	3	0	3
540	'Posterior hypothalamic nucleus'	0	0	0	3	0	0	3	0	0	0	0	0	3	0	3	0	3	0	3
541	'Hypothalamic lateral zone'	0	0	6	5	0	0	11	0	3	3	6	7	7	0	14	0	14	0	14
542	'Lateral hypothalamic area'	0	0	6	3	0	0	9	0	3	0	3	7	7	0	14	0	8	0	8
543	'Lateral preoptic area'	0	0	0	0	0	0	0	0	0	0	0	0	0	0	0	0	0	0	0
544	'Preparasubthalamic nucleus'	0	0	0	0	0	0	0	0	0	0	0	0	0	0	0	0	0	0	0
545	'Parasubthalamic nucleus'	0	0	0	3	0	0	3	0	0	0	0	0	0	0	0	0	0	0	0
546	'Perifornical nucleus'	0	0	0	0	0	0	0	0	0	3	3	0	0	0	0	0	0	0	0
547	'Retrochiasmatic area'	0	0	0	0	0	0	0	0	3	0	3	0	0	0	0	0	3	0	3
548	'Subthalamic nucleus'	0	0	0	3	0	0	3	0	0	0	0	0	0	0	0	0	0	0	0
549	'Tuberal nucleus'	0	0	0	0	0	0	0	0	0	0	0	0	0	0	0	0	4	0	4
550	'Zona incerta'	0	0	0	0	0	0	0	0	0	3	3	0	0	0	0	0	3	0	3
551	'Fields of Forel'	0	0	0	0	0	0	0	0	0	3	3	0	0	0	0	0	0	0	0
552	'Median eminence'	0	0	0	0	0	0	0	0	0	0	0	0	0	0	0	0	3	0	3
553	'Midbrain'	0	0	0	0	3	8	11	0	0	6	6	0	3	8	11	0	3	6	9
554	'Midbrain, sensory related'	0	0	0	0	3	3	6	0	0	0	0	0	0	0	0	0	0	0	0
555	'Superior colliculus, sensory related'	0	0	0	0	3	0	3	0	0	0	0	0	0	0	0	0	0	0	0
556	'Superior colliculus, optic layer'	0	0	0	0	0	0	0	0	0	0	0	0	0	0	0	0	0	0	0
557	'Superior colliculus, superficial gray layer'	0	0	0	0	3	0	3	0	0	0	0	0	0	0	0	0	0	0	0
558	'Superior colliculus, zonal layer'	0	0	0	0	0	0	0	0	0	0	0	0	0	0	0	0	0	0	0
559	'Inferior colliculus'	0	0	0	0	0	3	3	0	0	0	0	0	0	0	0	0	0	0	0
560	'Inferior colliculus, central nucleus'	0	0	0	0	0	0	0	0	0	0	0	0	0	0	0	0	0	0	0
561	'Inferior colliculus, dorsal nucleus'	0	0	0	0	0	0	0	0	0	0	0	0	0	0	0	0	0	0	0
562	'Inferior colliculus, external nucleus'	0	0	0	0	0	3	3	0	0	0	0	0	0	0	0	0	0	0	0
563	'Nucleus of the brachium of the inferior colliculus'	0	0	0	0	0	0	0	0	0	0	0	0	0	0	0	0	0	0	0
564	'Nucleus sagulum'	0	0	0	0	0	0	0	0	0	0	0	0	0	0	0	0	0	0	0
565	'Parabigeminal nucleus'	0	0	0	0	0	0	0	0	0	0	0	0	0	0	0	0	0	0	0
566	'Midbrain trigeminal nucleus'	0	0	0	0	0	0	0	0	0	0	0	0	0	0	0	0	0	0	0
567	'Subcommissural organ'	0	0	0	0	0	0	0	0	0	0	0	0	0	0	0	0	0	0	0
568	'Midbrain, motor related'	0	0	0	0	3	6	9	0	0	4	4	0	3	4	7	0	0	3	3
569	'Substantia nigra, reticular part'	0	0	0	0	0	0	0	0	0	0	0	0	0	3	3	0	0	0	0
570	'Ventral tegmental area'	0	0	0	0	0	0	0	0	0	0	0	0	3	0	3	0	0	0	0
571	'Paranigral nucleus'	0	0	0	0	0	0	0	0	0	0	0	0	0	0	0	0	0	0	0
572	'Midbrain reticular nucleus, retrorubral area'	0	0	0	0	0	0	0	0	0	0	0	0	0	0	0	0	0	0	0
573	'Midbrain reticular nucleus'	0	0	0	0	3	3	6	0	0	3	3	0	0	3	3	0	0	3	3
574	'Superior colliculus, motor related'	0	0	0	0	0	0	0	0	0	0	0	0	0	3	3	0	0	0	0
575	'Superior colliculus, motor related, deep gray layer'	0	0	0	0	0	0	0	0	0	0	0	0	0	0	0	0	0	0	0
576	'Superior colliculus, motor related, deep white layer'	0	0	0	0	0	0	0	0	0	0	0	0	0	0	0	0	0	0	0
577	'Superior colliculus, motor related, intermediate white layer'	0	0	0	0	0	0	0	0	0	0	0	0	0	3	3	0	0	0	0
578	'Superior colliculus, motor related, intermediate gray layer'	0	0	0	0	0	0	0	0	0	0	0	0	0	0	0	0	0	0	0
579	'Periaqueductal gray'	0	0	0	0	0	3	3	0	0	3	3	0	0	0	0	0	0	3	3
580	'Precommissural nucleus'	0	0	0	0	0	0	0	0	0	0	0	0	0	0	0	0	0	0	0
581	'Interstitial nucleus of Cajal'	0	0	0	0	0	0	0	0	0	0	0	0	0	0	0	0	0	0	0
582	'Nucleus of Darkschewitsch'	0	0	0	0	0	0	0	0	0	0	0	0	0	0	0	0	0	0	0
583	'Supraoculomotor periaqueductal gray'	0	0	0	0	0	0	0	0	0	0	0	0	0	0	0	0	0	0	0
584	'Pretectal region'	0	0	0	0	0	0	0	0	0	0	0	0	0	3	3	0	0	0	0
585	'Anterior pretectal nucleus'	0	0	0	0	0	0	0	0	0	0	0	0	0	3	3	0	0	0	0
586	'Medial pretectal area'	0	0	0	0	0	0	0	0	0	0	0	0	0	0	0	0	0	0	0
587	'Nucleus of the optic tract'	0	0	0	0	0	0	0	0	0	0	0	0	0	0	0	0	0	0	0
588	'Nucleus of the posterior commissure'	0	0	0	0	0	0	0	0	0	0	0	0	0	0	0	0	0	0	0
589	'Olivary pretectal nucleus'	0	0	0	0	0	0	0	0	0	0	0	0	0	0	0	0	0	0	0
590	'Posterior pretectal nucleus'	0	0	0	0	0	0	0	0	0	0	0	0	0	0	0	0	0	0	0
591	'Retroparafascicular nucleus'	0	0	0	0	0	0	0	0	0	0	0	0	0	0	0	0	0	0	0
592	'Cuneiform nucleus'	0	0	0	0	0	3	3	0	0	0	0	0	0	0	0	0	0	0	0
593	'Red nucleus'	0	0	0	0	0	0	0	0	0	0	0	0	0	0	0	0	0	0	0
594	'Oculomotor nucleus'	0	0	0	0	0	0	0	0	0	0	0	0	0	0	0	0	0	0	0
595	'Medial accesory oculomotor nucleus'	0	0	0	0	0	0	0	0	0	0	0	0	0	0	0	0	0	0	0
596	'Edinger-Westphal nucleus'	0	0	0	0	0	0	0	0	0	0	0	0	0	0	0	0	0	0	0
597	'Trochlear nucleus'	0	0	0	0	0	0	0	0	0	0	0	0	0	0	0	0	0	0	0
598	'Paratrochlear nucleus'	0	0	0	0	0	0	0	0	0	0	0	0	0	0	0	0	0	0	0
599	'Ventral tegmental nucleus'	0	0	0	0	0	0	0	0	0	0	0	0	0	0	0	0	0	0	0
600	'Anterior tegmental nucleus'	0	0	0	0	0	0	0	0	0	0	0	0	0	0	0	0	0	0	0
601	'Lateral terminal nucleus of the accessory optic tract'	0	0	0	0	0	0	0	0	0	0	0	0	0	0	0	0	0	0	0
602	'Dorsal terminal nucleus of the accessory optic tract'	0	0	0	0	0	0	0	0	0	0	0	0	0	0	0	0	0	0	0
603	'Medial terminal nucleus of the accessory optic tract'	0	0	0	0	0	0	0	0	0	3	3	0	0	0	0	0	0	0	0
604	'Midbrain, behavioral state related'	0	0	0	0	0	0	0	0	0	0	0	0	0	3	3	0	0	3	3
605	'Substantia nigra, compact part'	0	0	0	0	0	0	0	0	0	0	0	0	0	0	0	0	0	0	0
606	'Pedunculopontine nucleus'	0	0	0	0	0	0	0	0	0	0	0	0	0	3	3	0	0	0	0
607	'Midbrain raphe nuclei'	0	0	0	0	0	0	0	0	0	0	0	0	0	3	3	0	0	3	3
608	'Interfascicular nucleus raphe'	0	0	0	0	0	0	0	0	0	0	0	0	0	0	0	0	0	0	0
609	'Interpeduncular nucleus'	0	0	0	0	0	0	0	0	0	0	0	0	0	0	0	0	0	3	3
610	'Interpeduncular nucleus, rostral'	0	0	0	0	0	0	0	0	0	0	0	0	0	0	0	0	0	0	0
611	'Interpeduncular nucleus, caudal'	0	0	0	0	0	0	0	0	0	0	0	0	0	0	0	0	0	0	0
612	'Interpeduncular nucleus, apical'	0	0	0	0	0	0	0	0	0	0	0	0	0	0	0	0	0	0	0
613	'Interpeduncular nucleus, lateral'	0	0	0	0	0	0	0	0	0	0	0	0	0	0	0	0	0	0	0
614	'Interpeduncular nucleus, intermediate'	0	0	0	0	0	0	0	0	0	0	0	0	0	0	0	0	0	0	0
615	'Interpeduncular nucleus, dorsomedial'	0	0	0	0	0	0	0	0	0	0	0	0	0	0	0	0	0	3	3
616	'Interpeduncular nucleus, dorsolateral'	0	0	0	0	0	0	0	0	0	0	0	0	0	0	0	0	0	0	0
617	'Interpeduncular nucleus, rostrolateral'	0	0	0	0	0	0	0	0	0	0	0	0	0	0	0	0	0	0	0
618	'Rostral linear nucleus raphe'	0	0	0	0	0	0	0	0	0	0	0	0	0	0	0	0	0	0	0
619	'Central linear nucleus raphe'	0	0	0	0	0	0	0	0	0	0	0	0	0	3	3	0	0	0	0
620	'Dorsal nucleus raphe'	0	0	0	0	0	0	0	0	0	0	0	0	0	0	0	0	0	0	0
621	'Hindbrain'	0	0	0	0	3	3	6	0	0	0	0	0	0	3	3	0	0	3	3
622	'Pons'	0	0	0	0	3	3	6	0	0	0	0	0	0	3	3	0	0	3	3
623	'Pons, sensory related'	0	0	0	0	0	0	0	0	0	0	0	0	0	0	0	0	0	0	0
624	'Nucleus of the lateral lemniscus'	0	0	0	0	0	0	0	0	0	0	0	0	0	0	0	0	0	0	0
625	'Principal sensory nucleus of the trigeminal'	0	0	0	0	0	0	0	0	0	0	0	0	0	0	0	0	0	0	0
626	'Parabrachial nucleus'	0	0	0	0	0	0	0	0	0	0	0	0	0	0	0	0	0	0	0
627	'Koelliker-Fuse subnucleus'	0	0	0	0	0	0	0	0	0	0	0	0	0	0	0	0	0	0	0
628	'Parabrachial nucleus, lateral division'	0	0	0	0	0	0	0	0	0	0	0	0	0	0	0	0	0	0	0
629	'Parabrachial nucleus, medial division'	0	0	0	0	0	0	0	0	0	0	0	0	0	0	0	0	0	0	0
630	'Superior olivary complex'	0	0	0	0	0	0	0	0	0	0	0	0	0	0	0	0	0	0	0
631	'Superior olivary complex, periolivary region'	0	0	0	0	0	0	0	0	0	0	0	0	0	0	0	0	0	0	0
632	'Superior olivary complex, medial part'	0	0	0	0	0	0	0	0	0	0	0	0	0	0	0	0	0	0	0
633	'Superior olivary complex, lateral part'	0	0	0	0	0	0	0	0	0	0	0	0	0	0	0	0	0	0	0
634	'Pons, motor related'	0	0	0	0	0	3	3	0	0	0	0	0	0	0	0	0	0	0	0
635	'Barrington''s nucleus'	0	0	0	0	0	0	0	0	0	0	0	0	0	0	0	0	0	0	0
636	'Dorsal tegmental nucleus'	0	0	0	0	0	0	0	0	0	0	0	0	0	0	0	0	0	0	0
637	'Posterodorsal tegmental nucleus'	0	0	0	0	0	0	0	0	0	0	0	0	0	0	0	0	0	0	0
638	'Pontine central gray'	0	0	0	0	0	0	0	0	0	0	0	0	0	0	0	0	0	0	0
639	'Pontine gray'	0	0	0	0	0	0	0	0	0	0	0	0	0	0	0	0	0	0	0
640	'Pontine reticular nucleus, caudal part'	0	0	0	0	0	0	0	0	0	0	0	0	0	0	0	0	0	0	0
641	'Supragenual nucleus'	0	0	0	0	0	0	0	0	0	0	0	0	0	0	0	0	0	0	0
642	'Supratrigeminal nucleus'	0	0	0	0	0	3	3	0	0	0	0	0	0	0	0	0	0	0	0
643	'Tegmental reticular nucleus'	0	0	0	0	0	0	0	0	0	0	0	0	0	0	0	0	0	0	0
644	'Motor nucleus of trigeminal'	0	0	0	0	0	0	0	0	0	0	0	0	0	0	0	0	0	0	0
645	'Peritrigeminal zone'	0	0	0	0	0	0	0	0	0	0	0	0	0	0	0	0	0	0	0
646	'Accessory trigeminal nucleus'	0	0	0	0	0	0	0	0	0	0	0	0	0	0	0	0	0	0	0
647	'Parvicellular motor 5 nucleus'	0	0	0	0	0	0	0	0	0	0	0	0	0	0	0	0	0	0	0
648	'Intertrigeminal nucleus'	0	0	0	0	0	0	0	0	0	0	0	0	0	0	0	0	0	0	0
649	'Pons, behavioral state related'	0	0	0	0	0	0	0	0	0	0	0	0	0	0	0	0	0	0	0
650	'Superior central nucleus raphe'	0	0	0	0	0	0	0	0	0	0	0	0	0	0	0	0	0	0	0
651	'Locus ceruleus'	0	0	0	0	0	0	0	0	0	0	0	0	0	0	0	0	0	0	0
652	'Laterodorsal tegmental nucleus'	0	0	0	0	0	0	0	0	0	0	0	0	0	0	0	0	0	0	0
653	'Nucleus incertus'	0	0	0	0	0	0	0	0	0	0	0	0	0	0	0	0	0	0	0
654	'Pontine reticular nucleus'	0	0	0	0	0	0	0	0	0	0	0	0	0	0	0	0	0	0	0
655	'Nucleus raphe pontis'	0	0	0	0	0	0	0	0	0	0	0	0	0	0	0	0	0	0	0
656	'Subceruleus nucleus'	0	0	0	0	0	0	0	0	0	0	0	0	0	0	0	0	0	0	0
657	'Sublaterodorsal nucleus'	0	0	0	0	0	0	0	0	0	0	0	0	0	0	0	0	0	0	0
658	'Medulla'	0	0	0	0	0	3	3	0	0	0	0	0	0	0	0	0	0	0	0
659	'Medulla, sensory related'	0	0	0	0	0	0	0	0	0	0	0	0	0	0	0	0	0	0	0
660	'Area postrema'	0	0	0	0	0	0	0	0	0	0	0	0	0	0	0	0	0	0	0
661	'Cochlear nuclei'	0	0	0	0	0	0	0	0	0	0	0	0	0	0	0	0	0	0	0
662	'Dorsal cochlear nucleus'	0	0	0	0	0	0	0	0	0	0	0	0	0	0	0	0	0	0	0
663	'Ventral cochlear nucleus'	0	0	0	0	0	0	0	0	0	0	0	0	0	0	0	0	0	0	0
664	'Dorsal column nuclei'	0	0	0	0	0	0	0	0	0	0	0	0	0	0	0	0	0	0	0
665	'Cuneate nucleus'	0	0	0	0	0	0	0	0	0	0	0	0	0	0	0	0	0	0	0
666	'Gracile nucleus'	0	0	0	0	0	0	0	0	0	0	0	0	0	0	0	0	0	0	0
667	'External cuneate nucleus'	0	0	0	0	0	0	0	0	0	0	0	0	0	0	0	0	0	0	0
668	'Nucleus of the trapezoid body'	0	0	0	0	0	0	0	0	0	0	0	0	0	0	0	0	0	0	0
669	'Nucleus of the solitary tract'	0	0	0	0	0	0	0	0	0	0	0	0	0	0	0	0	0	0	0
670	'Spinal nucleus of the trigeminal, caudal part'	0	0	0	0	0	0	0	0	0	0	0	0	0	0	0	0	0	0	0
671	'Spinal nucleus of the trigeminal, interpolar part'	0	0	0	0	0	0	0	0	0	0	0	0	0	0	0	0	0	0	0
672	'Spinal nucleus of the trigeminal, oral part'	0	0	0	0	0	0	0	0	0	0	0	0	0	0	0	0	0	0	0
673	'Paratrigeminal nucleus'	0	0	0	0	0	0	0	0	0	0	0	0	0	0	0	0	0	0	0
674	'Medulla, motor related'	0	0	0	0	0	0	0	0	0	0	0	0	0	0	0	0	0	0	0
675	'Abducens nucleus'	0	0	0	0	0	0	0	0	0	0	0	0	0	0	0	0	0	0	0
676	'Facial motor nucleus'	0	0	0	0	0	0	0	0	0	0	0	0	0	0	0	0	0	0	0
677	'Accessory facial motor nucleus'	0	0	0	0	0	0	0	0	0	0	0	0	0	0	0	0	0	0	0
678	'Nucleus ambiguus'	0	0	0	0	0	0	0	0	0	0	0	0	0	0	0	0	0	0	0
679	'Nucleus ambiguus, dorsal division'	0	0	0	0	0	0	0	0	0	0	0	0	0	0	0	0	0	0	0
680	'Nucleus ambiguus, ventral division'	0	0	0	0	0	0	0	0	0	0	0	0	0	0	0	0	0	0	0
681	'Dorsal motor nucleus of the vagus nerve'	0	0	0	0	0	0	0	0	0	0	0	0	0	0	0	0	0	0	0
682	'Gigantocellular reticular nucleus'	0	0	0	0	0	0	0	0	0	0	0	0	0	0	0	0	0	0	0
683	'Infracerebellar nucleus'	0	0	0	0	0	0	0	0	0	0	0	0	0	0	0	0	0	0	0
684	'Inferior olivary complex'	0	0	0	0	0	0	0	0	0	0	0	0	0	0	0	0	0	0	0
685	'Intermediate reticular nucleus'	0	0	0	0	0	0	0	0	0	0	0	0	0	0	0	0	0	0	0
686	'Inferior salivatory nucleus'	0	0	0	0	0	0	0	0	0	0	0	0	0	0	0	0	0	0	0
687	'Linear nucleus of the medulla'	0	0	0	0	0	0	0	0	0	0	0	0	0	0	0	0	0	0	0
688	'Lateral reticular nucleus'	0	0	0	0	0	0	0	0	0	0	0	0	0	0	0	0	0	0	0
689	'Lateral reticular nucleus, magnocellular part'	0	0	0	0	0	0	0	0	0	0	0	0	0	0	0	0	0	0	0
690	'Lateral reticular nucleus, parvicellular part'	0	0	0	0	0	0	0	0	0	0	0	0	0	0	0	0	0	0	0
691	'Magnocellular reticular nucleus'	0	0	0	0	0	0	0	0	0	0	0	0	0	0	0	0	0	0	0
692	'Medullary reticular nucleus'	0	0	0	0	0	0	0	0	0	0	0	0	0	0	0	0	0	0	0
693	'Medullary reticular nucleus, dorsal part'	0	0	0	0	0	0	0	0	0	0	0	0	0	0	0	0	0	0	0
694	'Medullary reticular nucleus, ventral part'	0	0	0	0	0	0	0	0	0	0	0	0	0	0	0	0	0	0	0
695	'Parvicellular reticular nucleus'	0	0	0	0	0	0	0	0	0	0	0	0	0	0	0	0	0	0	0
696	'Parasolitary nucleus'	0	0	0	0	0	0	0	0	0	0	0	0	0	0	0	0	0	0	0
697	'Paragigantocellular reticular nucleus'	0	0	0	0	0	0	0	0	0	0	0	0	0	0	0	0	0	0	0
698	'Paragigantocellular reticular nucleus, dorsal part'	0	0	0	0	0	0	0	0	0	0	0	0	0	0	0	0	0	0	0
699	'Paragigantocellular reticular nucleus, lateral part'	0	0	0	0	0	0	0	0	0	0	0	0	0	0	0	0	0	0	0
700	'Perihypoglossal nuclei'	0	0	0	0	0	0	0	0	0	0	0	0	0	0	0	0	0	0	0
701	'Nucleus of Roller'	0	0	0	0	0	0	0	0	0	0	0	0	0	0	0	0	0	0	0
702	'Nucleus prepositus'	0	0	0	0	0	0	0	0	0	0	0	0	0	0	0	0	0	0	0
703	'Parapyramidal nucleus'	0	0	0	0	0	0	0	0	0	0	0	0	0	0	0	0	0	0	0
704	'Vestibular nuclei'	0	0	0	0	0	0	0	0	0	0	0	0	0	0	0	0	0	0	0
705	'Lateral vestibular nucleus'	0	0	0	0	0	0	0	0	0	0	0	0	0	0	0	0	0	0	0
706	'Medial vestibular nucleus'	0	0	0	0	0	0	0	0	0	0	0	0	0	0	0	0	0	0	0
707	'Spinal vestibular nucleus'	0	0	0	0	0	0	0	0	0	0	0	0	0	0	0	0	0	0	0
708	'Superior vestibular nucleus'	0	0	0	0	0	0	0	0	0	0	0	0	0	0	0	0	0	0	0
709	'Nucleus x'	0	0	0	0	0	0	0	0	0	0	0	0	0	0	0	0	0	0	0
710	'Hypoglossal nucleus'	0	0	0	0	0	0	0	0	0	0	0	0	0	0	0	0	0	0	0
711	'Nucleus y'	0	0	0	0	0	0	0	0	0	0	0	0	0	0	0	0	0	0	0
712	'Medulla, behavioral state related'	0	0	0	0	0	0	0	0	0	0	0	0	0	0	0	0	0	0	0
713	'Nucleus raphe magnus'	0	0	0	0	0	0	0	0	0	0	0	0	0	0	0	0	0	0	0
714	'Nucleus raphe pallidus'	0	0	0	0	0	0	0	0	0	0	0	0	0	0	0	0	0	0	0
715	'Nucleus raphe obscurus'	0	0	0	0	0	0	0	0	0	0	0	0	0	0	0	0	0	0	0
716	'Cerebellum'	0	0	0	0	0	3	3	0	0	0	0	0	0	0	0	0	0	0	0
717	'Cerebellar cortex'	0	0	0	0	0	3	3	0	0	0	0	0	0	0	0	0	0	0	0
718	'Vermal regions'	0	0	0	0	0	0	0	0	0	0	0	0	0	0	0	0	0	0	0
719	'Lingula (I)'	0	0	0	0	0	0	0	0	0	0	0	0	0	0	0	0	0	0	0
720	'Central lobule'	0	0	0	0	0	0	0	0	0	0	0	0	0	0	0	0	0	0	0
721	'Lobule II'	0	0	0	0	0	0	0	0	0	0	0	0	0	0	0	0	0	0	0
722	'Lobule III'	0	0	0	0	0	0	0	0	0	0	0	0	0	0	0	0	0	0	0
723	'Culmen'	0	0	0	0	0	0	0	0	0	0	0	0	0	0	0	0	0	0	0
724	'Lobule IV'	0	0	0	0	0	0	0	0	0	0	0	0	0	0	0	0	0	0	0
725	'Lobule V'	0	0	0	0	0	0	0	0	0	0	0	0	0	0	0	0	0	0	0
726	'Lobules IV-V'	0	0	0	0	0	0	0	0	0	0	0	0	0	0	0	0	0	0	0
727	'Declive (VI)'	0	0	0	0	0	0	0	0	0	0	0	0	0	0	0	0	0	0	0
728	'Folium-tuber vermis (VII)'	0	0	0	0	0	0	0	0	0	0	0	0	0	0	0	0	0	0	0
729	'Pyramus (VIII)'	0	0	0	0	0	0	0	0	0	0	0	0	0	0	0	0	0	0	0
730	'Uvula (IX)'	0	0	0	0	0	0	0	0	0	0	0	0	0	0	0	0	0	0	0
731	'Nodulus (X)'	0	0	0	0	0	0	0	0	0	0	0	0	0	0	0	0	0	0	0
732	'Hemispheric regions'	0	0	0	0	0	3	3	0	0	0	0	0	0	0	0	0	0	0	0
733	'Simple lobule'	0	0	0	0	0	0	0	0	0	0	0	0	0	0	0	0	0	0	0
734	'Ansiform lobule'	0	0	0	0	0	0	0	0	0	0	0	0	0	0	0	0	0	0	0
735	'Crus 1'	0	0	0	0	0	0	0	0	0	0	0	0	0	0	0	0	0	0	0
736	'Crus 2'	0	0	0	0	0	0	0	0	0	0	0	0	0	0	0	0	0	0	0
737	'Paramedian lobule'	0	0	0	0	0	0	0	0	0	0	0	0	0	0	0	0	0	0	0
738	'Copula pyramidis'	0	0	0	0	0	0	0	0	0	0	0	0	0	0	0	0	0	0	0
739	'Paraflocculus'	0	0	0	0	0	3	3	0	0	0	0	0	0	0	0	0	0	0	0
740	'Flocculus'	0	0	0	0	0	3	3	0	0	0	0	0	0	0	0	0	0	0	0
741	'Cerebellar nuclei'	0	0	0	0	0	0	0	0	0	0	0	0	0	0	0	0	0	0	0
742	'Fastigial nucleus'	0	0	0	0	0	0	0	0	0	0	0	0	0	0	0	0	0	0	0
743	'Interposed nucleus'	0	0	0	0	0	0	0	0	0	0	0	0	0	0	0	0	0	0	0
744	'Dentate nucleus'	0	0	0	0	0	0	0	0	0	0	0	0	0	0	0	0	0	0	0
745	'Vestibulocerebellar nucleus'	0	0	0	0	0	0	0	0	0	0	0	0	0	0	0	0	0	0	0

## Sheet: final
		AT288	AT289	AT290	AT291	AT279	AT280	AT288	AT289	AT290	AT291	AT279	AT280	average
6	'Frontal pole, cerebral cortex'	0	0	0	0			0	0	0	0			0
12	'Somatomotor areas'	9	76	6	39	11	7	0.00444884	0.0412148	0.0025	0.0204617	0.0121012	0.0200573	0.0167973
13	'Primary motor area'	9	47	3	7			0.00444884	0.0254881	0.00125	0.00367261			0.00871488
19	'Secondary motor area'	3	30	3	32			0.00148295	0.016269	0.00125	0.0167891			0.00894775
25	'Somatosensory areas'	12	46	14	7	3	0	0.00593178	0.0249458	0.00583333	0.00367261			0.0100959
26	'Primary somatosensory area'	9	34	9	6			0.00444884	0.0184382	0.00375	0.00314795			0.00744624
27	'Primary somatosensory area, nose'	3	4	6	3			0.00148295	0.0021692	0.0025	0.00157398			0.00193153
34	'Primary somatosensory area, barrel field'	3	0	3	0			0.00148295	0	0.00125	0			0.000683237
41	'Rostrolateral lateral visual area'	0	0	0	0			0	0	0	0			0
42	'Primary somatosensory area, lower limb'	3	3	0	0			0.00148295	0.0016269	0	0			0.000777461
49	'Primary somatosensory area, mouth'	6	18	3	3			0.00296589	0.00976139	0.00125	0.00157398			0.00388781
56	'Primary somatosensory area, upper limb'	0	7	0	3			0	0.0037961	0	0.00157398			0.00134252
63	'Primary somatosensory area, trunk'	0	0	3	0			0	0	0.00125	0			0.0003125
70	'Primary somatosensory area, unassigned'	0	3	0	0			0	0.0016269	0	0			0.000406725
77	'Supplemental somatosensory area'	6	12	7	3			0.00296589	0.00650759	0.00291667	0.00157398			0.00349103
84	'Gustatory areas'	7	5	8	3			0.00346021	0.0027115	0.00333333	0.00157398			0.00276975
91	'Visceral area'	6	13	6	0			0.00296589	0.00704989	0.0025	0			0.00312895
99	'Dorsal auditory area'	0	0	0	0			0	0	0	0			0
106	'Laterolateral anterior visual area'	0	0	0	0			0	0	0	0			0
107	'Primary auditory area'	0	0	0	0			0	0	0	0			0
114	'Posterior auditory area'	3	0	3	0			0.00148295	0	0.00125	0			0.000683237
121	'Ventral auditory area'	3	0	3	0			0.00148295	0	0.00125	0			0.000683237
128	'Visual areas'	6	0	4	3			0.00296589	0	0.00166667	0.00157398			0.00155163
129	'Anterolateral visual area'	0	0	3	0			0	0	0.00125	0			0.0003125
136	'Anteromedial visual area'	3	0	0	0			0.00148295	0	0	0			0.000370737
143	'Lateral visual area'	0	0	0	0			0	0	0	0			0
150	'Primary visual area'	6	0	3	3			0.00296589	0	0.00125	0.00157398			0.00144747
157	'Posterolateral visual area'	0	0	0	0			0	0	0	0			0
164	'posteromedial visual area'	0	0	3	0			0	0	0.00125	0			0.0003125
171	'Laterointermediate area'	0	0	0	0			0	0	0	0			0
178	'Postrhinal area'	3	0	0	0			0.00148295	0	0	0			0.000370737
185	'Anterior cingulate area'	3	13	3	3			0.00148295	0.00704989	0.00125	0.00157398			0.0028392
198	'Prelimbic area'	0	11	3	3			0	0.00596529	0.00125	0.00157398			0.00219732
204	'Infralimbic area'	0	6	0	3			0	0.0032538	0	0.00157398			0.00120694
210	'Orbital area'	4	40	19	24	5	3	0.00197726	0.021692	0.00791667	0.0125918	0.00550055	0.00859599	0.00971238
229	'Agranular insular area'	51	265	84	153	19	26	0.0252101	0.143709	0.035	0.0802728	2.09021	7.44986	1.63738
248	'Retrosplenial area'	11	0	3	3			0.00543747	0	0.00125	0.00157398			0.00206536
249	'Retrosplenial area, lateral agranular part'	6	0	3	0			0.00296589	0	0.00125	0			0.00105397
255	'Mediomedial anterior visual area'	0	0	0	0			0	0	0	0			0
256	'Mediomedial posterior visual area'	0	0	0	0			0	0	0	0			0
257	'Medial visual area'	0	0	0	0			0	0	0	0			0
258	'Retrosplenial area, dorsal part'	6	0	3	3			0.00296589	0	0.00125	0.00157398			0.00144747
264	'Retrosplenial area, ventral part'	6	0	3	0			0.00296589	0	0.00125	0			0.00105397
270	'Posterior parietal association areas'	3	0	3	0			0.00148295	0	0.00125	0			0.000683237
271	'Anterior area'	3	0	3	0			0.00148295	0	0.00125	0			0.000683237
278	'Rostrolateral visual area'	3	0	3	0			0.00148295	0	0.00125	0			0.000683237
285	'Temporal association areas'	3	3	4	0			0.00148295	0.0016269	0.00166667	0			0.00119413
292	'Perirhinal area'	6	0	4	3			0.00296589	0	0.00166667	0.00157398			0.00155163
298	'Ectorhinal area'	8	0	3	3			0.00395452	0	0.00125	0.00157398			0.00169462
305	'Main olfactory bulb'	0	0	0	0			0	0	0	0			0
306	'Accessory olfactory bulb'	0	0	0	0			0	0	0	0			0
310	'Anterior olfactory nucleus'	3	13	37	134	22	12	0.00148295	0.00704989	0.0154167	0.0703043	0.0242024	0.034384	0.0254734
311	'Taenia tecta'	3	5	4	6			0.00148295	0.0027115	0.00166667	0.00314795			0.00225227
314	'Dorsal peduncular area'	0	3	0	0			0	0.0016269	0	0			0.000406725
315	'Piriform area'	330	223	537	208	360	159	0.163124	0.120933	0.22375	0.109129	0.39604	0.455587	0.24476
316	'Nucleus of the lateral olfactory tract'	5	4	8	6	10	0	0.00247158	0.0021692	0.00333333	0.00314795			0.00278052
317	'Nucleus of the lateral olfactory tract, molecular layer'	0	3	3	0			0	0.0016269	0.00125	0			0.000719225
318	'Nucleus of the lateral olfactory tract, pyramidal layer'	4	3	8	6			0.00197726	0.0016269	0.00333333	0.00314795			0.00252136
320	'Cortical amygdalar area'	13	14	35	17	23	3	0.0064261	0.00759219	0.0145833	0.0089192			0.00938021
323	'Cortical amygdalar area, posterior part, lateral zone'	3	3	15	9			0.00148295	0.0016269	0.00625	0.00472193			0.00352044
324	'Cortical amygdalar area, posterior part, medial zone'	6	8	7	3			0.00296589	0.00433839	0.00291667	0.00157398			0.00294873
325	'Piriform-amygdalar area'	9	11	33	6	30	14	0.00444884	0.00596529	0.01375	0.00314795			0.00682802
326	'Postpiriform transition area'	7	5	17	15	20	0	0.00346021	0.0027115	0.00708333	0.00786988			0.00528123
327	'Hippocampal formation'	46	28	70	38	5	0	0.0227385	0.0151844	0.0291667	0.019937	0.00550055	0	0.0154212
328	'Hippocampal region'	16	7	30	4			0.00790905	0.0037961	0.0125	0.00209864			0.00657594		53
329	'Ammon''s horn'	15	7	23	3			0.00741473	0.0037961	0.00958333	0.00157398			0.00559203
342	'Retrohippocampal region'	30	21	40	34			0.0148295	0.0113883	0.0166667	0.0178384			0.0151807
344	'Entorhinal area, lateral part'	25	21	37	29	53	2	0.0123579	0.0113883	0.0154167	0.0152151	0.0583058	0.00573066	0.0197357
350	'Entorhinal area, medial part, dorsal zone'	6	0	0	3			0.00296589	0	0	0.00157398			0.00113497
356	'Entorhinal area, medial part, ventral zone'	0	0	0	0			0	0	0	0			0
357	'Parasubiculum'	0	0	0	0			0	0	0	0			0
358	'Postsubiculum'	0	0	0	0			0	0	0	0			0
359	'Presubiculum'	3	0	0	0			0.00148295	0	0	0			0.000370737
360	'Subiculum'	0	0	3	0			0	0	0.00125	0			0.0003125
363	'Prosubiculum'	0	0	0	3			0	0	0	0.00157398			0.000393494
366	'Hippocampo-amygdalar transition area'	0	0	0	0			0	0	0	0			0
367	'Area prostriata'	0	0	0	0			0	0	0	0			0
369	'Claustrum'	78	50	46	68	7	1	0.0385566	0.027115	0.0191667	0.0356768	0.00770077	0.00286533	0.0218469
370	'Endopiriform nucleus'	210	104	223	179	131	75	0.103806	0.0563991	0.0929167	0.093914	0.144114	0.2149	0.117675
371	'Endopiriform nucleus, dorsal part'	172	96	177	167			0.0850222	0.0520607	0.07375	0.087618			0.0746128
372	'Endopiriform nucleus, ventral part'	42	8	46	13			0.0207612	0.00433839	0.0191667	0.00682057			0.0127717
373	'Lateral amygdalar nucleus'	9	0	5	5			0.00444884	0	0.00208333	0.00262329			0.00228887
374	'Basolateral amygdalar nucleus'	20	19	47	8	12	2	0.00988631	0.0103037	0.0195833	0.00419727			0.0109927
378	'Basomedial amygdalar nucleus'	12	9	20	4	21	6	0.00593178	0.00488069	0.00833333	0.00209864			0.00531111
381	'Posterior amygdalar nucleus'	3	0	3	0			0.00148295	0	0.00125	0			0.000683237
383	'Striatum'	274	124	276	238	7	1	0.135442	0.0672451	0.115	0.124869	0.00770077	0.00286533	0.0755204
387	'Nucleus accumbens'	37	9	7	35	4	3	0.0182897	0.00488069	0.00291667	0.0183631			0.0111125
388	'Fundus of striatum'	8	4	10	4			0.00395452	0.0021692	0.00416667	0.00209864			0.00309726
389	'Olfactory tubercle'	16	3	20	21			0.00790905	0.0016269	0.00833333	0.0110178			0.00722178
390	'Lateral septal complex'	0	7	3	0			0	0.0037961	0.00125	0			0.00126152
391	'Lateral septal nucleus'	0	6	3	0			0	0.0032538	0.00125	0			0.00112595
392	'Lateral septal nucleus, caudal (caudodorsal) part'	0	4	3	0			0	0.0021692	0.00125	0			0.000854799
393	'Lateral septal nucleus, rostral (rostroventral) part'	0	3	3	0			0	0.0016269	0.00125	0			0.000719225
394	'Lateral septal nucleus, ventral part'	0	0	0	0			0	0	0	0			0
395	'Septofimbrial nucleus'	0	3	0	0			0	0.0016269	0	0			0.000406725
396	'Septohippocampal nucleus'	0	0	0	0			0	0	0	0			0
397	'Striatum-like amygdalar nuclei'	22	10	37	22			0.0108749	0.00542299	0.0154167	0.0115425			0.0108143
398	'Anterior amygdalar area'	7	0	21	4	19	8	0.00346021	0	0.00875	0.00209864			0.00357721
399	'Bed nucleus of the accessory olfactory tract'	0	0	0	0			0	0	0	0			0
400	'Central amygdalar nucleus'	8	3	4	8	14	3	0.00395452	0.0016269	0.00166667	0.00419727			0.00286134
404	'Intercalated amygdalar nucleus'	7	6	6	6			0.00346021	0.0032538	0.0025	0.00314795			0.00309049
405	'Medial amygdalar nucleus'	6	6	10	10	33	3	0.00296589	0.0032538	0.00416667	0.00524659			0.00390824
406	'Medial amygdalar nucleus, posterodorsal part'	0	0	0	0			0	0	0	0			0
407	'Pallidum'	58	25	42	47	1	0	0.0286703	0.0135575	0.0175	0.024659	0.00110011	0	0.0142478
412	'Substantia innominata'	39	13	21	37	10	4	0.0192783	0.00704989	0.00875	0.0194124	0.0110011	0.0114613	0.0128255
413	'Magnocellular nucleus'	12	0	4	5			0.00593178	0	0.00166667	0.00262329			0.00255544
414	'Pallidum, medial region'	6	5	3	3			0.00296589	0.0027115	0.00125	0.00157398			0.00212534
415	'Medial septal complex'	6	0	3	3			0.00296589	0	0.00125	0.00157398			0.00144747
416	'Medial septal nucleus'	0	0	3	0			0	0	0.00125	0			0.0003125
417	'Diagonal band nucleus'	6	0	3	3			0.00296589	0	0.00125	0.00157398			0.00144747
418	'Triangular nucleus of septum'	0	5	0	0			0	0.0027115	0	0			0.000677874
419		3	3	0	0			0.00148295	0.0016269	0	0			0.000777461
420	'Bed nuclei of the stria terminalis'	3	3	0	0			0.00148295	0.0016269	0	0			0.000777461
426	'Thalamus'	18	48	14	12			0.00889768	0.0260304	0.00583333	0.00629591			0.0117643
436	'Posterior triangular thalamic nucleus'	0	0	0	3			0	0	0	0.00157398			0.000393494
437	'Subparafascicular nucleus'	0	0	0	0			0	0	0	0			0
440	'Subparafascicular area'	0	3	3	0			0	0.0016269	0.00125	0			0.000719225
441	'Peripeduncular nucleus'	0	0	0	0			0	0	0	0			0
442	'Geniculate group, dorsal thalamus'	3	0	0	0			0.00148295	0	0	0			0.000370737
443	'Medial geniculate complex'	3	0	0	0			0.00148295	0	0	0			0.000370737
447	'Dorsal part of the lateral geniculate complex'	0	0	0	0			0	0	0	0			0
451	'Thalamus, polymodal association cortex related'	16	41	13	8			0.00790905	0.0222343	0.00541667	0.00419727			0.00993931
452	'Lateral group of the dorsal thalamus'	3	0	3	0			0.00148295	0	0.00125	0			0.000683237
453	'Lateral posterior nucleus of the thalamus'	0	0	3	0			0	0	0.00125	0			0.0003125
454	'Posterior complex of the thalamus'	3	0	3	0			0.00148295	0	0.00125	0			0.000683237
455	'Posterior limiting nucleus of the thalamus'	0	0	0	0			0	0	0	0			0
456	'Suprageniculate nucleus'	0	0	0	0			0	0	0	0			0
457	'Ethmoid nucleus of the thalamus'	0	0	0	0			0	0	0	0			0
458	'Anterior group of the dorsal thalamus'	0	3	6	3			0	0.0016269	0.0025	0.00157398			0.00142522
459	'Anteroventral nucleus of thalamus'	0	0	0	0			0	0	0	0			0
460	'Anteromedial nucleus'	0	3	6	0			0	0.0016269	0.0025	0			0.00103172
463	'Anterodorsal nucleus'	0	0	0	3			0	0	0	0.00157398			0.000393494
464	'Interanteromedial nucleus of the thalamus'	0	0	0	0			0	0	0	0			0
465	'Interanterodorsal nucleus of the thalamus'	0	0	0	0			0	0	0	0			0
466	'Lateral dorsal nucleus of thalamus'	0	0	0	0			0	0	0	0			0
467	'Medial group of the dorsal thalamus'	3	21	3	3			0.00148295	0.0113883	0.00125	0.00157398			0.0039238
468	'Intermediodorsal nucleus of the thalamus'	0	4	0	3			0	0.0021692	0	0.00157398			0.000935794
469	'Mediodorsal nucleus of thalamus'	3	13	3	3			0.00148295	0.00704989	0.00125	0.00157398			0.0028392
470	'Submedial nucleus of the thalamus'	0	3	0	0			0	0.0016269	0	0			0.000406725
471	'Perireunensis nucleus'	0	3	0	0			0	0.0016269	0	0			0.000406725
472	'Midline group of the dorsal thalamus'	6	12	3	3			0.00296589	0.00650759	0.00125	0.00157398			0.00307437
473	'Paraventricular nucleus of the thalamus'	6	3	3	3			0.00296589	0.0016269	0.00125	0.00157398			0.00185419
474	'Parataenial nucleus'	0	0	3	0			0	0	0.00125	0			0.0003125
475	'Nucleus of reuniens'	0	9	0	3			0	0.00488069	0	0.00157398			0.00161367
476	'Xiphoid thalamic nucleus'	0	3	0	0			0	0.0016269	0	0			0.000406725
477	'Intralaminar nuclei of the dorsal thalamus'	3	7	0	3			0.00148295	0.0037961	0	0.00157398			0.00171325
478	'Rhomboid nucleus'	0	3	0	0			0	0.0016269	0	0			0.000406725
479	'Central medial nucleus of the thalamus'	0	4	0	0			0	0.0021692	0	0			0.000542299
480	'Paracentral nucleus'	0	0	0	0			0	0	0	0			0
481	'Central lateral nucleus of the thalamus'	0	0	0	0			0	0	0	0			0
482	'Parafascicular nucleus'	3	3	0	3			0.00148295	0.0016269	0	0.00157398			0.00117096
483	'Posterior intralaminar thalamic nucleus'	0	3	0	0			0	0.0016269	0	0			0.000406725
484	'Reticular nucleus of the thalamus'	3	3	6	0			0.00148295	0.0016269	0.0025	0			0.00140246
485	'Geniculate group, ventral thalamus'	3	0	0	0			0.00148295	0	0	0			0.000370737
486	'Intergeniculate leaflet of the lateral geniculate complex'	0	0	0	0			0	0	0	0			0
487	'Intermediate geniculate nucleus'	0	0	0	0			0	0	0	0			0
488	'Ventral part of the lateral geniculate complex'	3	0	0	0			0.00148295	0	0	0			0.000370737
489	'Subgeniculate nucleus'	0	0	0	0			0	0	0	0			0
490	'Epithalamus'	0	3	0	0			0	0.0016269	0	0			0.000406725
491	'Medial habenula'	0	0	0	0			0	0	0	0			0
492	'Lateral habenula'	0	3	0	0			0	0.0016269	0	0			0.000406725
493	'Hypothalamus'	16	22	28	31			0.00790905	0.0119306	0.0116667	0.0162644			0.0119427
494	'Periventricular zone'	0	3	6	3			0	0.0016269	0.0025	0.00157398			0.00142522
495	'Supraoptic nucleus'	0	0	6	0			0	0	0.0025	0			0.000625
496	'Accessory supraoptic group'	0	0	0	0			0	0	0	0			0
497	'Paraventricular hypothalamic nucleus'	0	0	0	3			0	0	0	0.00157398			0.000393494
503	'Arcuate hypothalamic nucleus'	0	3	0	0			0	0.0016269	0	0			0.000406725
504	'Periventricular region'	0	3	0	3			0	0.0016269	0	0.00157398			0.000800219
505	'Anterodorsal preoptic nucleus'	0	0	0	0			0	0	0	0			0
506	'Anteroventral preoptic nucleus'	0	0	0	0			0	0	0	0			0
507	'Anteroventral periventricular nucleus'	0	0	0	0			0	0	0	0			0
508	'Dorsomedial nucleus of the hypothalamus'	0	0	0	0			0	0	0	0			0
509	'Median preoptic nucleus'	0	0	0	0			0	0	0	0			0
510	'Medial preoptic area'	0	0	0	3			0	0	0	0.00157398			0.000393494
511	'Vascular organ of the lamina terminalis'	0	0	0	0			0	0	0	0			0
512	'Posterodorsal preoptic nucleus'	0	3	0	0			0	0.0016269	0	0			0.000406725
513	'Parastrial nucleus'	0	0	0	0			0	0	0	0			0
514	'Periventricular hypothalamic nucleus, posterior part'	0	0	0	0			0	0	0	0			0
515	'Periventricular hypothalamic nucleus, preoptic part'	0	0	0	0			0	0	0	0			0
516	'Subparaventricular zone'	0	0	0	0			0	0	0	0			0
517	'Suprachiasmatic nucleus'	0	0	0	0			0	0	0	0			0
518	'Subfornical organ'	0	0	0	0			0	0	0	0			0
519	'Ventromedial preoptic nucleus'	0	0	0	0			0	0	0	0			0
520	'Ventrolateral preoptic nucleus'	0	0	0	0			0	0	0	0			0
521	'Hypothalamic medial zone'	6	11	4	6			0.00296589	0.00596529	0.00166667	0.00314795			0.00343645
522	'Anterior hypothalamic nucleus'	0	0	0	0			0	0	0	0			0
523	'Mammillary body'	3	3	3	3			0.00148295	0.0016269	0.00125	0.00157398			0.00148346
524	'Lateral mammillary nucleus'	0	0	0	0			0	0	0	0			0
525	'Medial mammillary nucleus'	0	0	0	3			0	0	0	0.00157398			0.000393494
531	'Supramammillary nucleus'	3	0	3	0			0.00148295	0	0.00125	0			0.000683237
532	'Tuberomammillary nucleus'	0	3	0	0			0	0.0016269	0	0			0.000406725
535	'Medial preoptic nucleus'	0	0	0	0			0	0	0	0			0
536	'Dorsal premammillary nucleus'	0	0	0	0			0	0	0	0			0
537	'Ventral premammillary nucleus'	0	3	0	0			0	0.0016269	0	0			0.000406725
538	'Paraventricular hypothalamic nucleus, descending division'	3	4	0	0			0.00148295	0.0021692	0	0			0.000913036
539	'Ventromedial hypothalamic nucleus'	0	5	3	3			0	0.0027115	0.00125	0.00157398			0.00138387
540	'Posterior hypothalamic nucleus'	3	0	3	3			0.00148295	0	0.00125	0.00157398			0.00107673
541	'Hypothalamic lateral zone'	11	6	14	14			0.00543747	0.0032538	0.00583333	0.00734523			0.00546746
542	'Lateral hypothalamic area'	9	3	14	8			0.00444884	0.0016269	0.00583333	0.00419727			0.00402659
543	'Lateral preoptic area'	0	0	0	0			0	0	0	0			0
544	'Preparasubthalamic nucleus'	0	0	0	0			0	0	0	0			0
545	'Parasubthalamic nucleus'	3	0	0	0			0.00148295	0	0	0			0.000370737
546	'Perifornical nucleus'	0	3	0	0			0	0.0016269	0	0			0.000406725
547	'Retrochiasmatic area'	0	3	0	3			0	0.0016269	0	0.00157398			0.000800219
548	'Subthalamic nucleus'	3	0	0	0			0.00148295	0	0	0			0.000370737
549	'Tuberal nucleus'	0	0	0	4			0	0	0	0.00209864			0.000524659
550	'Zona incerta'	0	3	0	3			0	0.0016269	0	0.00157398			0.000800219
551	'Fields of Forel'	0	3	0	0			0	0.0016269	0	0			0.000406725
552	'Median eminence'	0	0	0	3			0	0	0	0.00157398			0.000393494
553	'Midbrain'	11	6	11	9			0.00543747	0.0032538	0.00458333	0.00472193			0.00449913
554	'Midbrain, sensory related'	6	0	0	0			0.00296589	0	0	0			0.000741473
555	'Superior colliculus, sensory related'	3	0	0	0			0.00148295	0	0	0			0.000370737
556	'Superior colliculus, optic layer'	0	0	0	0			0	0	0	0			0
557	'Superior colliculus, superficial gray layer'	3	0	0	0			0.00148295	0	0	0			0.000370737
558	'Superior colliculus, zonal layer'	0	0	0	0			0	0	0	0			0
559	'Inferior colliculus'	3	0	0	0			0.00148295	0	0	0			0.000370737
560	'Inferior colliculus, central nucleus'	0	0	0	0			0	0	0	0			0
561	'Inferior colliculus, dorsal nucleus'	0	0	0	0			0	0	0	0			0
562	'Inferior colliculus, external nucleus'	3	0	0	0			0.00148295	0	0	0			0.000370737
563	'Nucleus of the brachium of the inferior colliculus'	0	0	0	0			0	0	0	0			0
564	'Nucleus sagulum'	0	0	0	0			0	0	0	0			0
565	'Parabigeminal nucleus'	0	0	0	0			0	0	0	0			0
566	'Midbrain trigeminal nucleus'	0	0	0	0			0	0	0	0			0
567	'Subcommissural organ'	0	0	0	0			0	0	0	0			0
568	'Midbrain, motor related'	9	4	7	3			0.00444884	0.0021692	0.00291667	0.00157398			0.00277717
569	'Substantia nigra, reticular part'	0	0	3	0			0	0	0.00125	0			0.0003125
570	'Ventral tegmental area'	0	0	3	0			0	0	0.00125	0			0.0003125
571	'Paranigral nucleus'	0	0	0	0			0	0	0	0			0
572	'Midbrain reticular nucleus, retrorubral area'	0	0	0	0			0	0	0	0			0
573	'Midbrain reticular nucleus'	6	3	3	3			0.00296589	0.0016269	0.00125	0.00157398			0.00185419
574	'Superior colliculus, motor related'	0	0	3	0			0	0	0.00125	0			0.0003125
575	'Superior colliculus, motor related, deep gray layer'	0	0	0	0			0	0	0	0			0
576	'Superior colliculus, motor related, deep white layer'	0	0	0	0			0	0	0	0			0
577	'Superior colliculus, motor related, intermediate white layer'	0	0	3	0			0	0	0.00125	0			0.0003125
578	'Superior colliculus, motor related, intermediate gray layer'	0	0	0	0			0	0	0	0			0
579	'Periaqueductal gray'	3	3	0	3			0.00148295	0.0016269	0	0.00157398			0.00117096
580	'Precommissural nucleus'	0	0	0	0			0	0	0	0			0
581	'Interstitial nucleus of Cajal'	0	0	0	0			0	0	0	0			0
582	'Nucleus of Darkschewitsch'	0	0	0	0			0	0	0	0			0
583	'Supraoculomotor periaqueductal gray'	0	0	0	0			0	0	0	0			0
584	'Pretectal region'	0	0	3	0			0	0	0.00125	0			0.0003125
585	'Anterior pretectal nucleus'	0	0	3	0			0	0	0.00125	0			0.0003125
586	'Medial pretectal area'	0	0	0	0			0	0	0	0			0
587	'Nucleus of the optic tract'	0	0	0	0			0	0	0	0			0
588	'Nucleus of the posterior commissure'	0	0	0	0			0	0	0	0			0
589	'Olivary pretectal nucleus'	0	0	0	0			0	0	0	0			0
590	'Posterior pretectal nucleus'	0	0	0	0			0	0	0	0			0
591	'Retroparafascicular nucleus'	0	0	0	0			0	0	0	0			0
592	'Cuneiform nucleus'	3	0	0	0			0.00148295	0	0	0			0.000370737
593	'Red nucleus'	0	0	0	0			0	0	0	0			0
594	'Oculomotor nucleus'	0	0	0	0			0	0	0	0			0
595	'Medial accesory oculomotor nucleus'	0	0	0	0			0	0	0	0			0
596	'Edinger-Westphal nucleus'	0	0	0	0			0	0	0	0			0
597	'Trochlear nucleus'	0	0	0	0			0	0	0	0			0
598	'Paratrochlear nucleus'	0	0	0	0			0	0	0	0			0
599	'Ventral tegmental nucleus'	0	0	0	0			0	0	0	0			0
600	'Anterior tegmental nucleus'	0	0	0	0			0	0	0	0			0
601	'Lateral terminal nucleus of the accessory optic tract'	0	0	0	0			0	0	0	0			0
602	'Dorsal terminal nucleus of the accessory optic tract'	0	0	0	0			0	0	0	0			0
603	'Medial terminal nucleus of the accessory optic tract'	0	3	0	0			0	0.0016269	0	0			0.000406725
604	'Midbrain, behavioral state related'	0	0	3	3			0	0	0.00125	0.00157398			0.000705994
605	'Substantia nigra, compact part'	0	0	0	0			0	0	0	0			0
606	'Pedunculopontine nucleus'	0	0	3	0			0	0	0.00125	0			0.0003125
607	'Midbrain raphe nuclei'	0	0	3	3			0	0	0.00125	0.00157398			0.000705994
608	'Interfascicular nucleus raphe'	0	0	0	0			0	0	0	0			0
609	'Interpeduncular nucleus'	0	0	0	3			0	0	0	0.00157398			0.000393494
618	'Rostral linear nucleus raphe'	0	0	0	0			0	0	0	0			0
619	'Central linear nucleus raphe'	0	0	3	0			0	0	0.00125	0			0.0003125
620	'Dorsal nucleus raphe'	0	0	0	0			0	0	0	0			0
621	'Hindbrain'	6	0	3	3			0.00296589	0	0.00125	0.00157398			0.00144747
622	'Pons'	6	0	3	3			0.00296589	0	0.00125	0.00157398			0.00144747
623	'Pons, sensory related'	0	0	0	0			0	0	0	0			0
624	'Nucleus of the lateral lemniscus'	0	0	0	0			0	0	0	0			0
625	'Principal sensory nucleus of the trigeminal'	0	0	0	0			0	0	0	0			0
626	'Parabrachial nucleus'	0	0	0	0			0	0	0	0			0
627	'Koelliker-Fuse subnucleus'	0	0	0	0			0	0	0	0			0
628	'Parabrachial nucleus, lateral division'	0	0	0	0			0	0	0	0			0
629	'Parabrachial nucleus, medial division'	0	0	0	0			0	0	0	0			0
630	'Superior olivary complex'	0	0	0	0			0	0	0	0			0
631	'Superior olivary complex, periolivary region'	0	0	0	0			0	0	0	0			0
632	'Superior olivary complex, medial part'	0	0	0	0			0	0	0	0			0
633	'Superior olivary complex, lateral part'	0	0	0	0			0	0	0	0			0
634	'Pons, motor related'	3	0	0	0			0.00148295	0	0	0			0.000370737
635	'Barrington''s nucleus'	0	0	0	0			0	0	0	0			0
636	'Dorsal tegmental nucleus'	0	0	0	0			0	0	0	0			0
637	'Posterodorsal tegmental nucleus'	0	0	0	0			0	0	0	0			0
638	'Pontine central gray'	0	0	0	0			0	0	0	0			0
639	'Pontine gray'	0	0	0	0			0	0	0	0			0
640	'Pontine reticular nucleus, caudal part'	0	0	0	0			0	0	0	0			0
641	'Supragenual nucleus'	0	0	0	0			0	0	0	0			0
642	'Supratrigeminal nucleus'	3	0	0	0			0.00148295	0	0	0			0.000370737
643	'Tegmental reticular nucleus'	0	0	0	0			0	0	0	0			0
644	'Motor nucleus of trigeminal'	0	0	0	0			0	0	0	0			0
645	'Peritrigeminal zone'	0	0	0	0			0	0	0	0			0
646	'Accessory trigeminal nucleus'	0	0	0	0			0	0	0	0			0
647	'Parvicellular motor 5 nucleus'	0	0	0	0			0	0	0	0			0
648	'Intertrigeminal nucleus'	0	0	0	0			0	0	0	0			0
649	'Pons, behavioral state related'	0	0	0	0			0	0	0	0			0
650	'Superior central nucleus raphe'	0	0	0	0			0	0	0	0			0
651	'Locus ceruleus'	0	0	0	0			0	0	0	0			0
652	'Laterodorsal tegmental nucleus'	0	0	0	0			0	0	0	0			0
653	'Nucleus incertus'	0	0	0	0			0	0	0	0			0
654	'Pontine reticular nucleus'	0	0	0	0			0	0	0	0			0
655	'Nucleus raphe pontis'	0	0	0	0			0	0	0	0			0
656	'Subceruleus nucleus'	0	0	0	0			0	0	0	0			0
657	'Sublaterodorsal nucleus'	0	0	0	0			0	0	0	0			0
658	'Medulla'	3	0	0	0			0.00148295	0	0	0			0.000370737
659	'Medulla, sensory related'	0	0	0	0			0	0	0	0			0
660	'Area postrema'	0	0	0	0			0	0	0	0			0
661	'Cochlear nuclei'	0	0	0	0			0	0	0	0			0
662	'Dorsal cochlear nucleus'	0	0	0	0			0	0	0	0			0
663	'Ventral cochlear nucleus'	0	0	0	0			0	0	0	0			0
664	'Dorsal column nuclei'	0	0	0	0			0	0	0	0			0
665	'Cuneate nucleus'	0	0	0	0			0	0	0	0			0
666	'Gracile nucleus'	0	0	0	0			0	0	0	0			0
667	'External cuneate nucleus'	0	0	0	0			0	0	0	0			0
668	'Nucleus of the trapezoid body'	0	0	0	0			0	0	0	0			0
669	'Nucleus of the solitary tract'	0	0	0	0			0	0	0	0			0
670	'Spinal nucleus of the trigeminal, caudal part'	0	0	0	0			0	0	0	0			0
671	'Spinal nucleus of the trigeminal, interpolar part'	0	0	0	0			0	0	0	0			0
672	'Spinal nucleus of the trigeminal, oral part'	0	0	0	0			0	0	0	0			0
673	'Paratrigeminal nucleus'	0	0	0	0			0	0	0	0			0
674	'Medulla, motor related'	0	0	0	0			0	0	0	0			0
675	'Abducens nucleus'	0	0	0	0			0	0	0	0			0
676	'Facial motor nucleus'	0	0	0	0			0	0	0	0			0
677	'Accessory facial motor nucleus'	0	0	0	0			0	0	0	0			0
678	'Nucleus ambiguus'	0	0	0	0			0	0	0	0			0
679	'Nucleus ambiguus, dorsal division'	0	0	0	0			0	0	0	0			0
680	'Nucleus ambiguus, ventral division'	0	0	0	0			0	0	0	0			0
681	'Dorsal motor nucleus of the vagus nerve'	0	0	0	0			0	0	0	0			0
682	'Gigantocellular reticular nucleus'	0	0	0	0			0	0	0	0			0
683	'Infracerebellar nucleus'	0	0	0	0			0	0	0	0			0
684	'Inferior olivary complex'	0	0	0	0			0	0	0	0			0
685	'Intermediate reticular nucleus'	0	0	0	0			0	0	0	0			0
686	'Inferior salivatory nucleus'	0	0	0	0			0	0	0	0			0
687	'Linear nucleus of the medulla'	0	0	0	0			0	0	0	0			0
688	'Lateral reticular nucleus'	0	0	0	0			0	0	0	0			0
689	'Lateral reticular nucleus, magnocellular part'	0	0	0	0			0	0	0	0			0
690	'Lateral reticular nucleus, parvicellular part'	0	0	0	0			0	0	0	0			0
691	'Magnocellular reticular nucleus'	0	0	0	0			0	0	0	0			0
692	'Medullary reticular nucleus'	0	0	0	0			0	0	0	0			0
693	'Medullary reticular nucleus, dorsal part'	0	0	0	0			0	0	0	0			0
694	'Medullary reticular nucleus, ventral part'	0	0	0	0			0	0	0	0			0
695	'Parvicellular reticular nucleus'	0	0	0	0			0	0	0	0			0
696	'Parasolitary nucleus'	0	0	0	0			0	0	0	0			0
697	'Paragigantocellular reticular nucleus'	0	0	0	0			0	0	0	0			0
698	'Paragigantocellular reticular nucleus, dorsal part'	0	0	0	0			0	0	0	0			0
699	'Paragigantocellular reticular nucleus, lateral part'	0	0	0	0			0	0	0	0			0
700	'Perihypoglossal nuclei'	0	0	0	0			0	0	0	0			0
701	'Nucleus of Roller'	0	0	0	0			0	0	0	0			0
702	'Nucleus prepositus'	0	0	0	0			0	0	0	0			0
703	'Parapyramidal nucleus'	0	0	0	0			0	0	0	0			0
704	'Vestibular nuclei'	0	0	0	0			0	0	0	0			0
705	'Lateral vestibular nucleus'	0	0	0	0			0	0	0	0			0
706	'Medial vestibular nucleus'	0	0	0	0			0	0	0	0			0
707	'Spinal vestibular nucleus'	0	0	0	0			0	0	0	0			0
708	'Superior vestibular nucleus'	0	0	0	0			0	0	0	0			0
709	'Nucleus x'	0	0	0	0			0	0	0	0			0
710	'Hypoglossal nucleus'	0	0	0	0			0	0	0	0			0
711	'Nucleus y'	0	0	0	0			0	0	0	0			0
712	'Medulla, behavioral state related'	0	0	0	0			0	0	0	0			0
713	'Nucleus raphe magnus'	0	0	0	0			0	0	0	0			0
714	'Nucleus raphe pallidus'	0	0	0	0			0	0	0	0			0
715	'Nucleus raphe obscurus'	0	0	0	0			0	0	0	0			0
716	'Cerebellum'	3	0	0	0			0.00148295	0	0	0			0.000370737
732	'Hemispheric regions'	3	0	0	0			0.00148295	0	0	0			0.000370737
733	'Simple lobule'	0	0	0	0			0	0	0	0			0
734	'Ansiform lobule'	0	0	0	0			0	0	0	0			0
735	'Crus 1'	0	0	0	0			0	0	0	0			0
736	'Crus 2'	0	0	0	0			0	0	0	0			0
737	'Paramedian lobule'	0	0	0	0			0	0	0	0			0
738	'Copula pyramidis'	0	0	0	0			0	0	0	0			0
739	'Paraflocculus'	3	0	0	0			0.00148295	0	0	0			0.000370737
740	'Flocculus'	3	0	0	0			0.00148295	0	0	0			0.000370737
741	'Cerebellar nuclei'	0	0	0	0			0	0	0	0			0
742	'Fastigial nucleus'	0	0	0	0			0	0	0	0			0
743	'Interposed nucleus'	0	0	0	0			0	0	0	0			0
744	'Dentate nucleus'	0	0	0	0			0	0	0	0			0
745	'Vestibulocerebellar nucleus'	0	0	0	0			0	0	0	0			0
		2023	1844	2400	1906

## Sheet: final >1%
	normalized by starter neuron	AT288	AT289	AT290	AT291	AT279	AT280		AT288	AT289	AT290	AT291	AT279	AT280	average
229	'Agranular insular area'	51	265	84	153	19	26		0.0252101	0.143709	0.035	0.0802728	2.09021	7.44986	1.63738
310	'Anterior olfactory nucleus'	3	13	37	134	22	12		0.00148295	0.00704989	0.0154167	0.0703043	0.0242024	0.034384	0.0254734
315	'Piriform area'	330	223	537	208	360	159		0.163124	0.120933	0.22375	0.109129	0.39604	0.455587	0.24476
344	'Entorhinal area, lateral part'	25	21	37	29	53	2		0.0123579	0.0113883	0.0154167	0.0152151	0.0583058	0.00573066	0.0197357
369	'Claustrum'	78	50	46	68	7	1		0.0385566	0.027115	0.0191667	0.0356768	0.00770077	0.00286533	0.0218469
370	'Endopiriform nucleus'	210	104	223	179	131	75		0.103806	0.0563991	0.0929167	0.093914	0.144114	0.2149	0.117675
407	'Pallidum'	58	25	42	47	1	0		0.0286703	0.0135575	0.0175	0.024659	0.00110011	0	0.0142478
412	'Substantia innominata'	39	13	21	37	10	4		0.0192783	0.00704989	0.00875	0.0194124	0.0110011	0.0114613	0.0128255
	starter neuron	47	3	19	12	39	17
	normalized by averaged presynaptic neuron number	AT288	AT289	AT290	AT291	AT279	AT280	Average cell number	AT288	AT289	AT290	AT291	AT279	AT280	median
229	'Agranular insular area'	51	265	84	153	19	26	67.5	0.513854	2.96919	0.654333	1.43158	0.252073	0.74552	0.699926	1
310	'Anterior olfactory nucleus'	3	13	37	134	22	12	17.5	0.0302267	0.145658	0.288218	1.2538	0.291874	0.344086	0.290046	2
315	'Piriform area'	330	223	537	208	360	159	276.5	3.32494	2.4986	4.18306	1.9462	4.77612	4.55914	3.754	3
344	'Entorhinal area, lateral part'	25	21	37	29	53	2	27	0.251889	0.235294	0.288218	0.271345	0.703151	0.0573477	0.261617	4
369	'Claustrum'	78	50	46	68	7	1	48	0.785894	0.560224	0.358325	0.636257	0.092869	0.0286738	0.459275	5
370	'Endopiriform nucleus'	210	104	223	179	131	75	155	2.11587	1.16527	1.7371	1.67485	1.73798	2.15054	1.73754	6
407	'Pallidum'	58	25	42	47	1	0	33.5	0.584383	0.280112	0.327167	0.439766	0.013267	0	0.303639	7
412	'Substantia innominata'	39	13	21	37	10	4	17	0.392947	0.145658	0.163583	0.346199	0.13267	0.114695	0.154621	8
		99.25	89.25	128.375	106.875	75.375	34.875
									1	2	-11.743	12.75	37.243	0.763868
									1	3	-39.0763	-14.5833	9.90965	0.61693
									1	4	-9.99298	14.5	38.993	0.624003
									1	5	-14.493	10	34.493	0.920835
									1	6	-32.743	-8.25	16.243	0.97145
									1	7	-9.57631	14.9167	39.4096	0.588459
									1	8	-7.82631	16.6667	41.1596	0.439599
									2	3	-51.8263	-27.3333	-2.84035	0.0164813
									2	4	-22.743	1.75	26.243	0.999999
									2	5	-27.243	-2.75	21.743	0.999975
									2	6	-45.493	-21	3.49298	0.15622
									2	7	-22.3263	2.16667	26.6596	0.999995
									2	8	-20.5763	3.91667	28.4096	0.999727
									3	4	4.59035	29.0833	53.5763	0.00770589
									3	5	0.0903537	24.5833	49.0763	0.0483842
									3	6	-18.1596	6.33333	30.8263	0.993974
									3	7	5.00702	29.5	53.993	0.00637707
									3	8	6.75702	31.25	55.743	0.00278422
									4	5	-28.993	-4.5	19.993	0.999317
									4	6	-47.243	-22.75	1.74298	0.0911828
									4	7	-24.0763	0.416667	24.9096	1
									4	8	-22.3263	2.16667	26.6596	0.999995
									5	6	-42.743	-18.25	6.24298	0.316955
									5	7	-19.5763	4.91667	29.4096	0.998784
									5	8	-17.8263	6.66667	31.1596	0.991761
									6	7	-1.32631	23.1667	47.6596	0.0794386
									6	8	0.423687	24.9167	49.4096	0.042801
									7	8	-22.743	1.75	26.243	0.999999
