# Supplementary material for: Endopiriform neurons projecting to ventral CA1 are a critical node for recognition memory
Source: eLife. 2025 Jan 21;13:RP99642. doi: 10.7554/eLife.99642 (PMC11750136; doi:10.7554/eLife.99642)
Supplement: Figure 6—source data 2. [file elife-99642-fig6-data2.xlsx]

## Sheet: Sheet1
		with quicknii alignments
			288									288	289	290	291
			PIR 1	PIR 2	PIR 3	sum	sum_normalized				pir1	6	7	18	13
		s1_g5	0	6	1	7	0.0714286				pir2	65	43	85	38
		s1_g6									pir3	27	24	30	19
		s1_g7	1	14	3	18	0.183673				sum	98	74	133	70	average	median
		s1_g8									normalized pir1	0.0612245	0.0945946	0.135338	0.185714	0.119218	0.114966
		s1_g9	0	10	3	13	0.132653				normalized pir2	0.663265	0.581081	0.639098	0.542857	0.606575	0.610089
		s1_g10									normalized pir3	0.27551	0.324324	0.225564	0.271429	0.274207	0.273469
		s1_g11	1	19	3	23	0.234694
		s1_g12
		s1_g13	0	6	6	12	0.122449
		s2_g2
		s2_g3	1	6	1	8	0.0816327
		s2_g4
		s2_g5	0	1	2	3	0.0306122
		s2_g6
		s2_g7	0	1	4	5	0.0510204
		s2_g8
		s2_g9	0	1	2	3	0.0306122
		s2_g10
		s2_g11	3	1	2	6	0.0612245
		sum	6	65	27	98
		with quicknii alignments
			289
			PIR 1	PIR 2	PIR 3
		s2_g2	3	8	5	16	0.216216
		s2_g3
		s2_g4	2	6	3	11	0.148649
		s2_g5
		s2_g6	1	5	3	9	0.121622
		s2_g7
		s2_g8	0	6	2	8	0.108108
		s2_g9
		s2_g10	0	7	1	8	0.108108
		s2_g11
		s2_g12	1	7	3	11	0.148649
		s2_g13
		s2_g14	0	2	3	5	0.0675676
		s3_02
		s3_03	0	2	3	5	0.0675676						1	2	-0.586113	-0.487357	-0.388601	6.40637e-07
		s3_04											1	3	-0.253745	-0.154989	-0.0562328	0.00451205
		s3_05	0	0	1	1	0.0135135						2	3	0.233613	0.332369	0.431125	1.60064e-05
		s3_06
		s3_07	0	0	0	0	0
		sum	7	43	24	74
		with quicknii alignments
			290
			PIR 1	PIR 2	PIR 3
		s1_g4	1	6	2	9	0.0676692
		s1_g5
		s1_g6	1	9	5	15	0.112782
		s1_g7
		s1_g8	1	12	7	20	0.150376
		s1_g9
		s1_g10	1	5	3	9	0.0676692
		s1_g11
		s1_g12	10	31	8	49	0.368421
		s1_g13
		s1_g14	2	10	2	14	0.105263
		s1_g15
		s2_g2	1	3	0	4	0.0300752
		s2_g3
		s2_g4	1	4	0	5	0.037594
		s2_g5
		s2_g6	0	3	1	4	0.0300752
		s2_g7
		s2_g8	0	2	2	4	0.0300752
		sum	18	85	30	133
		with quicknii alignments
			291
			PIR 1	PIR 2	PIR 3
		s1_g2	0	2	0	2	0.0285714
		s1_g3
		s1_g4	0	0	0	0	0
		s1_g5
		s1_g6	3	10	4	17	0.242857
		s1_g7
		s1_g8	0	8	4	12	0.171429
		s1_g9
		s1_g10	0	6	1	7	0.1
		s1_g11
		s1_g12	1	6	4	11	0.157143
		s1_g13
		s2_g2	1	2	3	6	0.0857143
		s2_g3
		s2_g4	3	2	2	7	0.1
		s2_g5
		s2_g6	5	2	1	8	0.114286
		s2_g7
		s2_g8	this part was cut	3	7	10	0.142857
		sum	13	38	19	70
