# Supplementary material for: Endopiriform neurons projecting to ventral CA1 are a critical node for recognition memory
Source: eLife. 2025 Jan 21;13:RP99642. doi: 10.7554/eLife.99642 (PMC11750136; doi:10.7554/eLife.99642)
Supplement: Figure 7—source data 1. [file elife-99642-fig7-data1.xlsx]

## Sheet: Social Interaction zone +50
			Empty OF	object Fm			object Ob									sociability Fm			sociability Ob									discrimination Fm			discrimination Ob									discrimination_2 Fm			discrimination_2 Ob
experiment ID	experiment date	mouse ID	event number	event number	time	event / time	event number	time	event / time	preference	toward event	anti-toward event	total event nmber	total event /time	time	event number	time	event / time	event number	time	event/time	sociability	toward event	anti-toward event	total event number	total event /time	time	event number	time	event/time	event number	time	event/time	discrimination	toward event	anti-toward event	total event number	total event /time	time	event number	time	event/time	event number	time	event/time	discrimination	toward event	anti-toward event	totoal event number
AT005	20231123	3626	145	63	132.77	0.474505	12	46.41	0.258565	0.259013	66	53	119	0.394531	301.624	97	224.213	0.432624	47	101.881	0.461323	0.687572	135	131	266	0.441995	601.817	17	62.288	0.272926	47	96.883	0.485121	0.608672	55	76	131	0.426851	306.898	21	32.861	0.639055	27	66.011	0.409023	0.667641	55	100	155
		3627	138	44	109.089	0.40334	43	74.732	0.575389	0.406548	58	76	134	0.418551	320.152	90	246.789	0.364684	33	88.638	0.372301	0.735746	146	126	272	0.451839	601.985	61	122.009	0.499963	33	89.114	0.370312	0.422095	85	59	144	0.476884	301.96	59	119.425	0.494034	28	69.751	0.401428	0.36871	90	53	143
	20231124	3631	115	32	82.671	0.387076	7	65.348	0.107119	0.441484	39	71	110	0.355668	309.277	73	259.522	0.281286	30	92.31	0.324992	0.73763	137	102	239	0.394453	605.902	31	92.871	0.333796	23	114.002	0.201751	0.551072	57	63	120	0.38296	313.348	43	92.718	0.463772	29	85.935	0.337464	0.481016	69	55	124
		3632	100	7	37.553	0.186403	55	132.243	0.415901	0.778835	43	69	112	0.362732	308.768	29	156.281	0.185563	81	193.103	0.419465	0.447304	102	113	215	0.355046	605.554	21	104.771	0.200437	48	139.842	0.343245	0.571687	45	58	103	0.335613	306.901	29	97.495	0.297451	31	79.39	0.390477	0.448823	68	49	117
		3633	120	10	54.349	0.183996	43	131.444	0.327136	0.707476	40	65	105	0.336721	311.831	68	327.131	0.207868	61	90.338	0.675242	0.783605	108	134	242	0.398504	607.271	21	78.251	0.268367	71	149.821	0.473899	0.656902	36	88	124	0.400944	309.27	29	84.422	0.343512	29	105.587	0.274655	0.555695	59	59	118
	20231125	3624	87	32	95.353	0.335595	49	89.947	0.544765	0.485413	37	101	138	0.450157	306.56	65	217.379	0.299017	55	160.14	0.343449	0.575809	95	141	236	0.385722	611.84	18	76.755	0.234512	55	162.554	0.338349	0.679264	36	89	125	0.38015	328.818	21	133.008	0.157885	18	63.189	0.28486	0.322069	47	56	103
		3625	113	12	87.38	0.137331	38	97.699	0.38895	0.527877	29	79	108	0.353475	305.538	36	244.613	0.147171	38	94.622	0.401598	0.721072	83	125	208	0.343294	605.895	18	84.541	0.212914	54	127.772	0.422628	0.60181	39	72	111	0.35793	310.116	24	47.379	0.506554	13	103.955	0.125054	0.686924	66	34	100
AT002	20230907	2747		28	73.236	0.382326	3	24.667	0.12162	0.251953	34	16	50	0.315171	158.644	45	107.117	0.420101	29	71.553	0.405294	0.599524	45	90	135	0.433925	311.113	49	76.823	0.63783	11	28.934	0.380176	0.273589	46	40	86	0.545543	157.641
				event/time										Summed event number from heatmap
				Fm chamber					Preference					experiment ID	experiment date	mouse ID	object	sociability	discrimination
				object	sociability	discrimination	discrimination 2		object	sociability	discrimination	discrimination 2		AT005	20231123	3626	0.3887	0.3976	0.4043	0.0089
				0.474505	0.432624	0.272926	0.639055		0.259013	0.687572	0.608672	0.667641				3627	0.3825	0.4494	0.4115	0.0669
				0.40334	0.364684	0.499963	0.494034		0.406548	0.735746	0.422095	0.36871			20231124	3631	0.3637	0.4274	0.5706	0.0637
				0.387076	0.281286	0.333796	0.463772		0.441484	0.73763	0.551072	0.481016				3632	0.3326	0.4089	0.4656	0.0763
				0.186403	0.185563	0.200437	0.297451		0.778835	0.447304	0.571687	0.448823				3633	0.3617	0.5283	0.3615	0.1666
				0.183996	0.207868	0.268367	0.343512		0.707476	0.783605	0.656902	0.555695			20231125	3624	0.3644	0.3763	0.3113	0.0119
				0.335595	0.299017	0.234512	0.157885		0.485413	0.575809	0.679264	0.322069				3625	0.3914	0.3842	0.3181	-0.0072
				0.137331	0.147171	0.212914	0.506554		0.527877	0.721072	0.60181	0.686924
				0.382326	0.420101	0.63783			0.251953	0.599524	0.273589							ttest	0.0481649
																		ttest	0.368327
				event/time
				Ob chamber										Summed normalized amp from heatmap
				object	sociability	discrimination	discrimination 2							experiment ID	experiment date	mouse ID	object	sociability	discrimination
				0.258565	0.461323	0.485121	0.409023							AT005	20231123	3626	6.39221	7.09247	5.18053	0.70026
				0.575389	0.372301	0.370312	0.401428									3627	6.28352	6.24909	3.97222	-0.034431
				0.107119	0.324992	0.201751	0.337464								20231124	3631	6.56552	9.92366	10.4889	3.35814
				0.415901	0.419465	0.343245	0.390477									3632	4.04257	8.35294	5.65049	4.31037
				0.327136	0.675242	0.473899	0.274655									3633	8.14814	11.3122	6.30221	3.16403
				0.544765	0.343449	0.338349	0.28486								20231125	3624	6.22373	9.17721	7.78435	2.95348
				0.38895	0.401598	0.422628	0.125054									3625	6.59451	9.90726	5.40854	3.31275
				0.12162	0.405294	0.380176
																		ttest	0.00537823
				total event /time														ttest	0.932816
				object	sociability	discrimination	discrimination 2
				0.394531	0.441995	0.426851	0.500361							average normalized amp from heatmap
				0.418551	0.451839	0.476884	0.472226							experiment ID	experiment date	mouse ID	object	sociability	discrimination
				0.355668	0.394453	0.38296	0.406299							AT005	20231123	3626	0.177561	0.144744	0.13633
				0.362732	0.355046	0.335613	0.371159									3627	0.174542	0.130189	0.128136
				0.336721	0.398504	0.400944	0.384068								20231124	3631	0.218851	0.215732	0.255827
				0.450157	0.385722	0.38015	0.322928									3632	0.144377	0.194254	0.18835
				0.353475	0.343294	0.35793	0.328396									3633	0.246913	0.245917	0.190976
				0.315171	0.433925	0.545543									20231125	3624	0.188598	0.213424	0.235889
																3625	0.188415	0.225165	0.193162
																		ttest	0.756123
																		ttest	0.933062
[truncated: 2 more columns]

## Sheet: Social interaction zone +100
Social behavior
			Empty OF		object Fm			object Ob									sociability Fm			sociability Ob									discrimination Fm			discrimination Ob									discrimination_2 Fm			discrimination_2 Ob
experiment ID	experiment date	mouse ID	event number	time	event number	time	event / time	event number	time	event / time	preference	Fm amp	Ob amp	total amp			event number	time	event / time	event number	time	event/time	sociability	Fm amp	Ob amp	total amp			event number	time	event/time	event number	time	event/time	discrimination	Fm amp	Ob amp	total amp			event number	time	event/time	event number	time	event/time	discrimination	toward event	anti-toward event
AT005	20231123	3626	145		74	159.409	0.464215	21	71.009	0.295737	0.308175	4.1122	3.5226	3.9488			120	264.214	0.454177	74	170.85	0.433128	0.607299	3.6075	3.6558	3.5911			24	81.838	0.293262	59	137.87	0.427939	0.627515	3.5742	3.593	3.5718			28	45.526	0.615033	51	109.259	0.466781	0.705876	55	100
		3627	138		52	143.31	0.36285	50	98.158	0.509383	0.406505	3.5193	3.9239	3.7824			119	306.935	0.387704	67	136.901	0.489405	0.69155	3.4351	3.6307	3.5256			72	136.493	0.5275	40	108.63	0.368222	0.443165	3.4506	3.3416	3.4822			70	141.44	0.49491	34	80.495	0.422386	0.362696	90	53
	20231124	3631	115		66	133.586	0.494064	22	83.64	0.263032	0.385037	4.4856	3.7083	4.18			111	326.434	0.340038	52	124.474	0.417758	0.723948	4.264	3.5071	4.0424			41	110.942	0.369562	45	139.553	0.322458	0.557109	4.1512	3.7978	4.1026			47	109.072	0.430908	31	99.484	0.311608	0.477013	69	55
		3632	100	330.1	10	46.478	0.215156	72	190.519	0.377915	0.803888	3.4279	4.0551	4.1946			57	258.434	0.220559	107	242.114	0.441941	0.516302	4.0018	4.1204	4.2626			26	120.394	0.215958	51	147.951	0.344709	0.551346	3.3678	4.2613	4.2471			42	125.256	0.335313	37	91.987	0.402231	0.423429	68	49
		3633	120	302.64	11	65.705	0.167415	47	151.096	0.311061	0.696934	3.6715	4.4073	4.389			78	372.793	0.209231	86	124.049	0.693274	0.750325	3.8462	4.0218	4.1016			25	96.458	0.25918	76	160.973	0.472129	0.625305	3.9542	4.3179	4.1561			34	97.92	0.347222	41	125.12	0.327685	0.560976	59	59
	20231125	3624	87	301.29	45	113.917	0.395024	61	134.691	0.452888	0.541781	4.2542	3.867	4.0231			107	284.801	0.375701	81	212.687	0.380841	0.572478	4.0657	4.3383	4.1909			25	96.866	0.258088	78	194.361	0.401315	0.667387	4.513	4.0737	4.2094			35	172.363	0.20306	39	102.425	0.380766	0.372742	47	56
		3625	113		19	105.298	0.18044	58	148.716	0.390005	0.585464	4.1966	4.2541	4.3087			70	324.666	0.215606	51	133.348	0.382458	0.708856	4.2361	4.291	4.2736			28	107.559	0.260322	64	142.341	0.449624	0.569592	3.7477	4.3027	4.1175			42	82.739	0.50762	20	125.171	0.159781	0.602044	66	34
		2747			32	88.332	0.36227	8	40.103	0.199486	0.312244						70	152.762	0.458229	43	93.347	0.460647	0.620709						61	97.291	0.626985	17	36.788	0.462107	0.274376
					Event																					Amp									total amp
					Fm	Ob		Fm	Ob			Fm	Ob				Fm	Ob								Fm	Ob		Fm	Ob		Fm	Ob
				3626	0.464215	0.295737	3626	0.454177	0.433128	-0.0210488	0.607299	0.293262	0.427939	0.134677	0.627515		0.615033	0.466781	-0.148252	0.705876						4.1122	3.5226		3.6075	3.6558		3.5742	3.593		3.9488	3.5911	3.5718
				3627	0.36285	0.509383	3627	0.387704	0.489405	0.101701	0.69155	0.5275	0.368222	-0.159277	0.443165		0.49491	0.422386	-0.072523	0.362696						3.5193	3.9239		3.4351	3.6307		3.4506	3.3416		3.7824	3.5256	3.4822
				3631	0.494064	0.263032	3631	0.340038	0.417758	0.0777198	0.723948	0.369562	0.322458	-0.0471043	0.557109		0.430908	0.311608	-0.1193	0.477013						4.4856	3.7083		4.264	3.5071		4.1512	3.7978		4.18	4.0424	4.1026
				3632	0.215156	0.377915	3632	0.220559	0.441941	0.221381	0.516302	0.215958	0.344709	0.128751	0.551346		0.335313	0.402231	0.0669175	0.423429						3.4279	4.0551		4.0018	4.1204		3.3678	4.2613		4.1946	4.2626	4.2471
				3633	0.167415	0.311061	3633	0.209231	0.693274	0.484043	0.750325	0.25918	0.472129	0.212949	0.625305		0.347222	0.327685	-0.0195368	0.560976						3.6715	4.4073		3.8462	4.0218		3.9542	4.3179		4.389	4.1016	4.1561
				3624	0.395024	0.452888	3624	0.375701	0.380841	0.0051404	0.572478	0.258088	0.401315	0.143227	0.667387		0.20306	0.380766	0.177707	0.372742						4.2542	3.867		4.0657	4.3383		4.513	4.0737		4.0231	4.1909	4.2094
				3625	0.18044	0.390005	3625	0.215606	0.382458	0.166852	0.708856	0.260322	0.449624	0.189302	0.569592		0.50762	0.159781	-0.347839	0.602044						4.1966	4.2541		4.2361	4.291		3.7477	4.3027		4.3087	4.2736	4.1175
				2747			2747	0.458229	0.460647	0.00241769	0.620709	0.63783	0.380176	-0.257654	0.273589
					0.36285	0.377915		0.340038	0.433128			0.260322	0.401315													3.95247	3.96261		3.92234	3.93787		3.82267	3.95543		4.11809	3.99826	3.98381
											0.146802
								0.946672
					0.464215	0.295737	3626	0.454177	0.433128		0.293262	0.427939					0.615033	0.466781
					0.494064	0.263032	3631	0.340038	0.417758		0.369562	0.322458					0.430908	0.311608
					0.215156	0.377915	3632	0.220559	0.441941		0.215958	0.344709					0.335313	0.402231
					0.167415	0.311061	3633	0.209231	0.693274		0.25918	0.472129					0.347222	0.327685
					0.395024	0.452888	3624	0.375701	0.380841		0.258088	0.401315					0.20306	0.380766
					0.18044	0.390005	3625	0.215606	0.382458		0.260322	0.449624					0.50762	0.159781
				median	0.30509	0.344488		0.280299	0.425443		0.259751	0.414627					0.389065	0.354226
					0.716255			0.0950806			0.0193113						0.424776
				event number				mouse	object		familiar	novel
				3626	74	21	3.52381	120	74	1.62162	24	59	2.45833	28	51
				3631	66	22	3	111	52	2.13462	41	45	1.09756	47	31
				3632	10	72	0.138889	57	107	0.53271	26	51	1.96154	42	37
				3633	11	47	0.234043	78	86	0.906977	25	76	3.04	34	41
				3624	45	61	0.737705	107	81	1.32099	25	78	3.12	35	39
				3625	19	58	0.327586	70	51	1.37255	28	64	2.28571	42	20
					0.648602			0.384951			0.00581846			0.831637
					f_ob	n_ob	preference			mouse	object	sociability			familiar	novel	discrimination			familiar	novel-familiar	discrimination
				3626	74	21	0.308175	0.283784		120	74	0.607299	1.62162		24	59	0.627515	2.45833		28	51	0.705876	1.82143
				3627	52	50	0.406505	0.961538		119	67	0.69155	1.77612		72	40	0.443165	0.555556		70	34	0.362696	0.485714
				3631	66	22	0.385037	0.333333		111	52	0.723948	2.13462		41	45	0.557109	1.09756		47	31	0.477013	0.659574
				3632	10	72	0.803888	7.2		57	107	0.516302	0.53271		26	51	0.551346	1.96154		42	37	0.423429	0.880952
				3633	11	47	0.696934	4.27273		78	86	0.750325	0.906977		25	76	0.625305	3.04		34	41	0.560976	1.20588
				3624	45	61	0.541781	1.35556		107	81	0.572478	1.32099		25	78	0.667387	3.12		35	39	0.372742	1.11429
				3625	19	58	0.585464	3.05263		70	51	0.708856	1.37255		28	64	0.569592	2.28571		42	20	0.602044	0.47619
				2747	32	8	0.312244	0.25		70	43	0.620709	1.62791		61	17	0.274376	0.278689
							P =2.611655754352302e-04					p = 0.2874					p = 0.003					p = 0.2031
							r = 0.9523					r = 0.43					r = 0.89					r = 0.5478
[truncated: 3 more columns]

## Sheet: Object interaction zone +100
Novel object recognition						familialization										test
			Empty OF			novel ob				familiar ob						novel ob				familiar ob
experiment ID	experiment date	mouse ID	event number	time	event/time	event number	time	event / time	contact number	event number	time	event / time	contact number	contact_preferance	time_preference	event number	time	event / time	contact number	event number	time	event/time	contact number	time_discrimination	contact_discrimination
AT007	20240121	3624	83	185.87	0.446549	70	168.45	0.415554	36	53	171.7	0.308678	34	0.514286	0.495223	28	63.801	0.438865	12	61	117.05	0.521145	7	0.352782	0.631579
		3631	71	182.98	0.388021	48	141.525	0.339163	24	76	166.413	0.456695	27	0.470588	0.459589	47	69.94	0.672005	12	23	29.82	0.771294	6	0.701083	0.666667
		3632	35	182.97	0.191288	58	136.94	0.423543	14	51	145.45	0.350636	17	0.451613	0.484932	27	62.58	0.431448	5	27	118.73	0.227407	5	0.345155	0.5
		3633	93	186.04	0.499892	46	196.83	0.233704	26	25	71.84	0.347996	10	0.722222	0.732609	14	26.7	0.524345	7	41	175.1	0.234152	2	0.132309	0.777778
	20240122	3625	56	196.23	0.285379	27	103.1	0.261882	18	45	170.82	0.263435	25	0.418605	0.376387	12	44.52	0.269542	5	23	62.58	0.36753	6	0.415686	0.454545
		3626	67	188.93	0.354629	71	170.71	0.41591	13	24	61.52	0.390117	16	0.448276	0.73509	24	61.49	0.390307	7	15	47.89	0.313218	5	0.562169	0.583333
		3627	49	190.45	0.257285	3	15.06	0.199203	3	12	27.64	0.434153	3	0.5	0.352693	4	8.28	0.483092	0	13	9.1	1.42857	1	0.47641	0
				familialization		test
			basal	familiar ob	novel ob	familiar	novel		contact_discrimination
		3624	0.446549	0.308678	0.415554	0.521145	0.438865	-0.0822802	0.631579
		3631	0.388021	0.456695	0.339163	0.771294	0.672005	-0.0992899	0.666667
		3632	0.191288	0.350636	0.423543	0.227407	0.431448	0.204041	0.5
		3633	0.499892	0.347996	0.233704	0.234152	0.524345	0.290193	0.777778
		3625	0.285379	0.263435	0.261882	0.36753	0.269542	-0.0979878	0.454545
		3626	0.354629	0.390117	0.41591	0.313218	0.390307	0.0770896	0.583333
		3627	0.257285	0.434153	0.199203	1.42857	0.483092	-0.94548	0
				0.908569

## Sheet: object interaction zone +50
Novel object recognition						familialization										test
			Empty OF			novel ob				familiar ob						novel ob				familiar ob
experiment ID	experiment date	mouse ID	event number	time	event/time	event number	time	event / time	contact number	event number	time	event / time	contact number	time_preference	contact_preference	event number	time	event / time	contact number	event number	time	event/time	contact number	discrimination
AT007	20240121	3624	83	185.87	0.446549	30	77.89	0.385159	36	32	96.76	0.330715	34	0.445978	0.514286	17	38.71	0.439163	12	21	59.33	0.353952	7	0.631579	0.394839
		3631	71	182.98	0.388021	33	82.64	0.399322	24	60	86.92	0.69029	27	0.487379	0.470588	22	33.42	0.658288	12	9	15.96	0.56391	6	0.666667	0.676792
		3632	35	182.97	0.191288	30	69.94	0.428939	14	26	62.44	0.4164	17	0.528328	0.451613	8	36.16	0.221239	5	7	95.13	0.0735835	5	0.5	0.275421
		3633	93	186.04	0.499892	31	73.92	0.419372	26	19	33.88	0.560803	10	0.685714	0.722222	8	15.67	0.51053	7	30	157.54	0.190428	2	0.777778	0.0904682
	20240122	3625	56	196.23	0.285379	11	48.69	0.225919	18	29	97.38	0.297802	25	0.333333	0.418605	4	21.66	0.184672	5	10	42.4	0.235849	6	0.454545	0.338121
		3626	67	188.93	0.354629	32	125.31	0.255367	13	6	28.2	0.212766	16	0.816299	0.448276	13	28.41	0.457585	7	11	14.42	0.762829	5	0.583333	0.66332
		3627	49	190.45	0.257285	1	7.17	0.13947	3	9	18.38	0.489663	3	0.280626	0.5	0	5.42	0	0	10	5.64	1.77305	1	0	0.490054
AT012	20240406	4250				81	99.093	0.817414	41	40	65.059	0.614827	29	0.603666	0.585714	52	53.023	0.980706	22	27	34.272	0.787815	19	0.536585	0.6074	saline
	20240408	4250				45	60.452	0.744392	21	37	41.174	0.898625	16	0.594848	0.567568	12	31.093	0.385939	11	19	32.204	0.589989	10	0.52381	0.491224	CNO
	20240410	4251				1	69.887	0.0143088	31	9	91.12	0.0987709	29	0.434062	0.516667	8	29.75	0.268908	12	16	28.322	0.564932	8	0.6	0.512295	CNO
	20240411	4251				53	87.448	0.606074	21	61	83.334	0.731994	20	0.512045	0.512195	5	13.396	0.373246	8	23	41.463	0.554711	10	0.444444	0.24419	saline
	20240412	4255				4	39.559	0.101115	23	12	35.513	0.337904	19	0.526947	0.547619	13	32.368	0.401631	12	15	53.567	0.280023	18	0.4	0.376657	saline
	20240425	4257				13	31.297	0.415375	14	6	29.138	0.205917	20	0.517862	0.411765	10	32.13	0.311236	11	7	18.683	0.374672	5	0.6875	0.632319	saline
				familialization				test
			basal	familiar	novel	delta	contact_preference	familiar	novel	delta	contact_discrimination
		3624	0.446549	0.330715	0.385159	0.0544434	0.514286	0.353952	0.439163	0.0852105	0.631579
		3631	0.388021	0.69029	0.399322	-0.290968	0.470588	0.56391	0.658288	0.0943787	0.666667
		3632	0.191288	0.4164	0.428939	0.0125393	0.451613	0.0735835	0.221239	0.147655	0.5
		3633	0.499892	0.560803	0.419372	-0.141431	0.722222	0.190428	0.51053	0.320102	0.777778
		3626	0.354629	0.212766	0.255367	0.0426007	0.448276	0.762829	0.457585	-0.305244	0.583333
		3627	0.257285	0.489663	0.13947	-0.350193	0.5	1.77305	0	-1.77305	0
		3625	0.285379	0.297802	0.225919	-0.0718833	0.418605	0.235849	0.184672	-0.0511768	0.454545
				p = 0.8125		p = 0.7238		p = 0.4375		p = 0.0024
						R = -0.16				R = 0.93
	event number		familialization			test
			familiar	novel		familiar	novel
		3624	32	30		21	17
		3631	60	33		9	22
		3632	26	30		7	8
		3633	19	31		30	8
		3626	6	32		11	13
			0.781421			0.744165
			familiar	novel	preference		familiar	novel	discrimination
		3624	32	30	0.445978	0.9375	21	17	0.394839	0.809524
		3631	60	33	0.487379	0.55	9	22	0.676792	2.44444
		3632	26	30	0.528328	1.15385	7	8	0.275421	1.14286
		3633	19	31	0.685714	1.63158	30	8	0.0904682	0.266667
		3625	29	11	0.333333	0.37931	10	4	0.338121	0.4
		3626	6	32	0.816299	5.33333	11	13	0.66332	1.18182
		3627	9	1	0.280626	0.111111	10	0	0.490054	0
		4250	40	81	0.603666	2.025	27	52	0.6074	1.92593
		4251	61	53	0.512045	0.868852	23	5	0.24419	0.217391
		4255	12	4	0.526947	0.333333	15	13	0.376657	0.866667
		4257	6	13	0.517862	2.16667	7	10	0.632319	1.42857
		4250	37	45	0.594848	1.21622	19	12	0.52381	0.631579
		4251	9	1	0.434062	0.111111	16	8	0.6	0.5
					p = 0.0105				p = 0.1548
					r = 0.8718				r = 0.5995
			familiar	novel	preference		familiar	novel	discrimination
		3624	32	30	0.445978	0.9375	21	17	0.394839	0.809524
		3631	60	33	0.487379	0.55	9	22	0.676792	2.44444
		3632	26	30	0.528328	1.15385	7	8	0.275421	1.14286
		3625	29	11	0.333333	0.37931	10	4	0.338121	0.4
		3626	6	32	0.816299	5.33333	11	13	0.66332	1.18182
		4250	40	81	0.603666	2.025	27	52	0.6074	1.92593
		4251	61	53	0.512045	0.868852	23	5	0.24419	0.217391
		4255	12	4	0.526947	0.333333	15	13	0.376657	0.866667
		4257	6	13	0.517862	2.16667	7	10	0.632319	1.42857
					p = 0.0014				p = 0.0101
					r = 0.8873				r = 0.7968

## Sheet: Novel mouse interaction +100
Social behavior
			Empty OF		novel Fm		novel Ob
experiment ID	experiment date	mouse ID	event number	time	event number	time	event number	time	preference
	20240125	3631	86	199.98	73	95.73	37	156.77	0.620871
		3632	85	205.59	39	83.69	46	152.2	0.645216
		3633	87	193.16	31	103.31	27	122.84	0.543179
		3624	68	192.5	24	91.78	69	168.56	0.647461
		3625	70	187.22	4	103.07	20	130.76	0.55921
		3626	74	198.96	31	108.24	43	118.05	0.521676
		3627	91	186.55	29	87.65	63	175.39	0.666781
					73	37	0.620871	0.506849
					39	46	0.645216	1.17949
					31	27	0.543179	0.870968
					24	69	0.647461	2.875
					4	20	0.55921	5
					31	43	0.521676	1.3871
					29	63	0.666781	2.17241
					0.328996		r = -0.05
							p = 0.919
