# Supplementary material for: Endopiriform neurons projecting to ventral CA1 are a critical node for recognition memory
Source: eLife. 2025 Jan 21;13:RP99642. doi: 10.7554/eLife.99642 (PMC11750136; doi:10.7554/eLife.99642)
Supplement: Figure 8—source data 1. [file elife-99642-fig8-data1.xlsx]

## Sheet: sociability_discrimination scor
			sociability		discrimination
experimental ID	mouse ID	expression	control	CNO	control	CNO		exclude due to not proper nose point detection
AT006	2130	GiDREADD	0.723466	0.796534	0.500555	0.600293		AT007	2386	GiDREADD	0.771845	0.473072	0.538678	0.86758
AT006	2134	GiDREADD	0.82198	0.76884	0.659026	0.609407
AT006	2133	GiDREADD	0.810845	0.754269	0.636916	0.569149			AT006 2 out of 8
AT006	2131	GiDREADD	0.761745	0.683136	0.704473	0.579278			AT007 1 out of 2
AT006	2139	GiDREADD	0.652811	0.584937	0.503876	0.438343			AT009 2 out of 9
AT006	2141	GiDREADD	0.900417	0.639376	0.508934	0.386428
AT007	2388	GiDREADD	0.7169	0.826469	0.659054	0.501988
AT010	2574	GiDREADD	0.788656	0.775777	0.587686	0.58982
AT010	2573	GiDREADD	0.726422	0.771034	0.55	0.871119
AT010	2569	GiDREADD	0.730458	0.65593	0.729166	0.572935
AT010	2575	GiDREADD	0.771875	0.537883	0.767802	0.484685
AT010	2576	GiDREADD	0.812198	0.762252	0.691072	0.537677
AT010	2572	GiDREADD	0.565897	0.727148	0.732124	0.368056
AT010	2580	GiDREADD	0.731446	0.785209	0.705036	0.671463
		Median	0.746596	0.75826	0.65904	0.571042
			p=0.3910		p=0.0419 signrank test
AT007	2380	tdTomato	0.7586	0.712098	0.549662	0.699646			AT007 3 out of 8
AT007	2382	tdTomato	0.87234	0.516149	0.610879	0.729222			AT010 0 out of 3
AT007	2377	tdTomato	0.743827	0.677918	0.642575	0.610527
AT007	2385	tdTomato	0.840667	0.875309	0.672489	0.391964
AT007	2381	tdTomato	0.745933	0.786328	0.651335	0.545192
AT010	2577	tdTomato	0.78457	0.606096	0.516649	0.821918
AT010	2579	tdTomato	0.696691	0.785092	0.727147	0.366238
AT010	2578	tdTomato	0.817662	0.786955	0.801597	0.654518
		Median	0.771585	0.748595	0.646955	0.632523
			p=0.3828		p=0.7422

## Sheet: distance_velocity
	pretest		control		CNO				sociability		control		CNO				discrimination		control		CNO
experimental ID	mouse ID	expression	distance	velocity	distance	velocity					distance	velocity	distance	velocity					distance	velocity	distance	velocity
AT006	2130	GiDREADD	1565.07	5.53181	1433.82	5.20302		AT006	2130	GiDREADD	3875.92	6.73623	3323.74	5.61122		AT006	2130	GiDREADD	1444.31	5.01473	1222.29	4.21082
AT006	2134	GiDREADD	1942.23	6.92013	1072.05	3.7153		AT006	2134	GiDREADD	4286.06	7.66163	2322.98	4.26722		AT006	2134	GiDREADD	1457.59	5.6244	1064.18	3.95964
AT006	2133	GiDREADD	1404.43	4.78925	1829.63	6.47286		AT006	2133	GiDREADD	3861.2	7.17762	3243.52	5.86561		AT006	2133	GiDREADD	1935.86	6.89831	2024.29	7.11192
AT006	2131	GiDREADD	1213.84	4.33776	1746.91	6.32284		AT006	2131	GiDREADD	3457.96	6.02365	3966.93	7.07446		AT006	2131	GiDREADD	1440.67	5.13481	1813.75	6.2634
AT006	2139	GiDREADD	1832.94	6.43825	2038.99	7.56688		AT006	2139	GiDREADD	3216.09	5.76719	3935.27	7.41874		AT006	2139	GiDREADD	1610.63	6.06117	1824.75	6.5921
AT006	2141	GiDREADD	1648.69	5.9383	2186.96	7.96069		AT006	2141	GiDREADD	3403.64	5.99374	3762.78	6.93986		AT006	2141	GiDREADD	1577.2	5.55174	1864.73	6.89514
AT007	2388	GiDREADD	1975.43	7.25186	1986.74	6.92614		AT007	2388	GiDREADD	4139.08	7.29464	3979.24	7.14915		AT007	2388	GiDREADD	2294.78	8.60851	2582.29	8.64821
AT010	2574	GiDREADD	1786.34	6.02613	1210.32	4.0881		AT010	2574	GiDREADD	3177.78	5.45108	2873.12	5.05493		AT010	2574	GiDREADD	1780.19	6.00018	1663.98	5.59679
AT010	2573	GiDREADD	1896.48	6.32948	1096.74	3.67807		AT010	2573	GiDREADD	3356.53	5.77818	2813.26	4.77506		AT010	2573	GiDREADD	1950.39	6.56557	1979.35	6.79918
AT010	2569	GiDREADD	2108.64	7.33	1764.4	6.18999		AT010	2569	GiDREADD	3486.85	5.97805	2804.16	4.83354		AT010	2569	GiDREADD	1699.4	5.76202	1937.89	6.54146
AT010	2575	GiDREADD	1135.14	3.81881	1988.35	6.63478		AT010	2575	GiDREADD	2452.3	4.09283	3491.44	5.87683		AT010	2575	GiDREADD	1509.48	5.08139	1850.53	6.20062
AT010	2576	GiDREADD	1386.84	4.66272	2014.36	6.82847		AT010	2576	GiDREADD	2515.25	4.28379	3346.87	5.65253		AT010	2576	GiDREADD	1381.87	4.61099	1412.14	4.7607
AT010	2572	GiDREADD	2435.9	9.30811	4443.95	14.8758		AT010	2572	GiDREADD	5012.51	8.40879	8322.28	14.1921		AT010	2572	GiDREADD	2998.06	10.3274	4194.68	14.0731
AT010	2580	GiDREADD	1581.97	5.33663	2128.87	7.15888		AT010	2580	GiDREADD	3616.33	6.10764	3355.15	5.63792		AT010	2580	GiDREADD	1883.67	6.29597	2263.1	7.61187
			1717.51	5.98222	1908.18	6.55382					3472.4	6.00869	3351.01	5.75907					1655.02	5.8811	1857.63	6.56678
					signrank p =0.4263	signrank p =0.391							signrank p =0.8552	signrank p =0.8077							signrank p =0.0676	signrank p =0.1040
AT007	2380	tdTomato	2072.3	7.08643	2049.64	6.98348		AT007	2380	tdTomato	3840.25	6.94465	5316.21	9.0844		AT007	2380	tdTomato	2378.66	8.08489	2629.04	9.21
AT007	2382	tdTomato	1605.25	5.8144	1771.03	6.10456		AT007	2382	tdTomato	3418.56	6.66406	3812.23	6.61353		AT007	2382	tdTomato	1660.82	6.3962	1936.37	6.51725
AT007	2377	tdTomato	2538.16	8.53332	1516.65	5.22224		AT007	2377	tdTomato	3932.67	6.89111	2639.72	4.42005		AT007	2377	tdTomato	1961.72	6.77968	1436.64	4.86222
AT007	2385	tdTomato	2048.85	7.19408	1824.37	6.32116		AT007	2385	tdTomato	4859.61	9.26021	4382.29	8.40233		AT007	2385	tdTomato	2801.43	9.90676	2222.67	8.05991
AT007	2381	tdTomato	1327.23	4.6623	1300.88	4.98282		AT007	2381	tdTomato	3494.29	6.34208	2481.12	4.65214		AT007	2381	tdTomato	1785.48	6.79271	2183.39	7.46724
AT010	2577	tdTomato	2383.98	8.05399	2092.77	7.19493		AT010	2577	tdTomato	3877.5	6.55148	3134.47	5.30054		AT010	2577	tdTomato	1600.46	5.34479	1877.77	6.28665
AT010	2579	tdTomato	3293.23	11.0534	1556.6	5.53261		AT010	2579	tdTomato	6650.07	11.2065	5315.75	9.05243		AT010	2579	tdTomato	2712.73	9.30243	1425.44	4.81067
AT010	2578	tdTomato	1357.96	4.88857	2171.02	7.30677		AT010	2578	tdTomato	2438.9	4.13173	3339.51	5.64786		AT010	2578	tdTomato	1605.77	5.39194	2508.4	8.36483
			2060.57	7.14025	1797.7	6.21286					3858.88	6.77759	3575.87	6.13069					1873.6	6.78619	2059.88	6.99225
					signrank p =0.25	signrank p =0.3828							signrank p =0.5469	signrank p =0.3125							signrank p =0.9453	signrank p =0.9453
AT007	2386	GiDREADD	1971.65	6.92457	1573.31	5.2651		AT007	2386	GiDREADD	3395.33	6.04505	3364.23	5.68795		AT007	2386	GiDREADD	1689.82	5.89148	1413.86	4.83649

## Sheet: pretest chamber
			control			CNO
experimental ID	mouse ID	expression	center	left	right	center	left	right		control	CNO
AT006	2130	GiDREADD	39.2426	117.603	124.487	59.9017	104.343	126.313		0.485782	0.452375	0.0334072	0.0334072				117.603	124.487	104.343	126.313
AT006	2134	GiDREADD	78.9916	50.6998	162.865	46.8816	133.572	107.596		0.237398	0.553855	-0.316457	0.316457				50.6998	162.865	133.572	107.596
AT006	2133	GiDREADD	44.5649	128.437	115.293	57.4598	106.595	132.007		0.526964	0.446748	0.0802161	0.0802161				128.437	115.293	106.595	132.007
AT006	2131	GiDREADD	40.9985	122.87	117.738	56.642	127.554	100.203		0.510665	0.560044	-0.0493796	0.0493796				122.87	117.738	127.554	100.203
AT006	2139	GiDREADD	33.8628	107.785	135.201	41.3773	99.4058	149.609		0.443585	0.399196	0.0443889	0.0443889				107.785	135.201	99.4058	149.609
AT006	2141	GiDREADD	43.9402	102.214	137.704	48.4426	81.5513	154.215		0.426037	0.345899	0.0801383	0.0801383				102.214	137.704	81.5513	154.215
AT007	2388	GiDREADD	43.0011	150.848	84.1245	46.5039	129.685	113.537		0.641982	0.533196	0.108785	0.108785				150.848	84.1245	129.685	113.537
AT010	2574	GiDREADD	49.76	109.66	138.89	66.097	161.487	70.7914		0.441199	0.69523	-0.254031	0.254031				109.66	138.89	161.487	70.7914
AT010	2573	GiDREADD	47.2568	152.286	100.397	26.476	90.6316	182.64		0.602676	0.331654	0.271022	0.271022				152.286	100.397	90.6316	182.64
AT010	2569	GiDREADD	29.2304	167.245	95.6403	51.1371	123.054	114.792		0.63619	0.517368	0.118822	0.118822				167.245	95.6403	123.054	114.792
AT010	2575	GiDREADD	44.8158	72.9822	180.515	101.085	103.714	95.3264		0.287901	0.52107	-0.233169	0.233169				72.9822	180.515	103.714	95.3264
AT010	2576	GiDREADD	92.1964	101.46	104.965	70.4158	111.413	115.482		0.49151	0.491033	0.000476936	0.000476936				101.46	104.965	111.413	115.482
AT010	2572	GiDREADD	61.0896	107.846	95.828	38.8051	174.811	85.9344		0.529503	0.670428	-0.140925	0.140925				107.846	95.828	174.811	85.9344
AT010	2580	GiDREADD	72.3565	135.512	90.0074	70.2282	94.2636	134.385		0.600888	0.412264	0.188624	0.188624				135.512	90.0074	94.2636	134.385
										0.501087	0.504201		0.113804
												0.918142
AT007	2380	tdTomato	41.1233	109.662	145.528	29.669	147.97	119.74		0.429727	0.552725	-0.122998	0.122998
AT007	2382	tdTomato	58.5211	130.249	92.069	50.3245	123.245	119.99		0.585868	0.506691	0.0791769	0.0791769
AT007	2377	tdTomato	66.6612	115.546	116.422	54.016	94.3246	143.772		0.498112	0.396161	0.101951	0.101951
AT007	2385	tdTomato	58.8998	104.342	126.563	23.785	176.698	91.3846		0.451883	0.659118	-0.207235	0.207235
AT007	2381	tdTomato	103.967	83.2486	100.462	30.7329	134.136	102.088		0.453151	0.567834	-0.114683	0.114683
AT010	2577	tdTomato	43.3141	124.622	130.318	39.7457	126.623	119.425		0.488829	0.514627	-0.0257985	0.0257985
AT010	2579	tdTomato	64.0942	108.535	126.624	88.0045	93.8256	116.484		0.461539	0.446131	0.0154079	0.0154079
AT010	2578	tdTomato	64.5946	122.805	95.7027	53.3289	170.753	70.6044		0.562017	0.70747	-0.145453	0.145453
										0.475184	0.533676		0.108317
												0.227199			p = 0.5167 ranksum test
AT007	2386	GiDREADD	58.3361	108.222	123.62	58.2115	101.901	139.645

## Sheet: sociability chamber
			control			CNO
experimental ID	mouse ID	expression	center	mouse	object	center	mouse	object
AT006	2130	GiDREADD	101.384	297.955	184.118	72.3447	339.82	183.49
AT006	2134	GiDREADD	52.2557	370.421	151.385	100.639	260.61	192.954
AT006	2133	GiDREADD	77.1003	356.651	118.341	67.0251	308.904	189.122
AT006	2131	GiDREADD	75.7241	337.191	168.032	117.78	275.926	176.295
AT006	2139	GiDREADD	57.3365	335.193	177.58	48.6267	271.796	223.983
AT006	2141	GiDREADD	51.7551	445.018	81.1059	86.7668	256.732	209.092
AT007	2388	GiDREADD	158.3	273.098	146.533	114.65	306.526	146.129
AT010	2574	GiDREADD	116.78	332.63	135.868	101.948	283.877	190.44
AT010	2573	GiDREADD	139.06	302.903	145.193	81.7335	299.71	211.406
AT010	2569	GiDREADD	102.386	324.306	162.216	82.7976	327.748	176.672
AT010	2575	GiDREADD	78.0411	310.913	210.53	145.882	225.613	225.926
AT010	2576	GiDREADD	131.299	215.849	242.447	108.645	351.03	134.742
AT010	2572	GiDREADD	136.306	256.465	204.897	108.581	240.881	243.009
AT010	2580	GiDREADD	133.24	333.881	128.608	126.168	319.049	153.204
AT007	2380	tdTomato	73.91	372.679	119.282	89.1789	321.795	180.11
AT007	2382	tdTomato	80.981	327.428	120.595	117.927	254.006	212.381
AT007	2377	tdTomato	147.694	308.155	119.094	122.347	281.554	194.816
AT007	2385	tdTomato	67.2801	390.913	87.7457	55.1346	372.612	106.014
AT007	2381	tdTomato	123.349	299.579	140.183	88.8673	317.732	136.242
AT010	2577	tdTomato	100.634	352.783	141.689	60.5805	298.647	236.502
AT010	2579	tdTomato	112.274	301.714	182.367	153.329	316.108	123.289
AT010	2578	tdTomato	55.5113	409.232	130.423	81.3584	390.333	122.538
			90.8075	340.106	125.509	89.0231	316.92	158.176
AT007	2386	GiDREADD	157.143	228.361	189.81	119.407	257.839	217.098

## Sheet: discrimination chamber
			control			CNO
experimental ID	mouse ID	expression	center	familiar	novel	center	familiar	novel				control		total		CNO
AT006	2130	GiDREADD	57.8406	124.57	109.547	32.2456	116.773	145.011				124.57	109.547	234.117		116.773	145.011	261.784
AT006	2134	GiDREADD	22.8538	140.629	101.684	10.0769	144.831	117.855				140.629	101.684	242.313		144.831	117.855	262.686
AT006	2133	GiDREADD	27.6058	113.491	144.664	43.5056	97.9033	145.791				113.491	144.664	258.155		97.9033	145.791	243.694
AT006	2131	GiDREADD	25.6713	81.2089	178.008	40.814	106.166	146.918				81.2089	178.008	259.217		106.166	146.918	253.084
AT006	2139	GiDREADD	26.2287	112.614	134.837	49.39	127.638	106.542				112.614	134.837	247.451		127.638	106.542	234.18
AT006	2141	GiDREADD	34.4864	116.791	138.133	36.3719	133.906	107.3				116.791	138.133	254.924		133.906	107.3	241.206
AT007	2388	GiDREADD	72.7923	96.7643	103.712	43.3179	130.955	125.447				96.7643	103.712	200.476		130.955	125.447	256.402
AT010	2574	GiDREADD	52.578	91.1353	154.166	39.3076	138.077	122.116				91.1353	154.166	245.301		138.077	122.116	260.193
AT010	2573	GiDREADD	40.1217	133.822	125.435	36.6164	71.9809	184.96				133.822	125.435	259.257		71.9809	184.96	256.941
AT010	2569	GiDREADD	57.8347	105.78	133.946	67.2235	76.1741	154.101				105.78	133.946	239.726		76.1741	154.101	230.275
AT010	2575	GiDREADD	44.8783	78.1144	175.82	52.8284	140.396	106.721				78.1144	175.82	253.934		140.396	106.721	247.117
AT010	2576	GiDREADD	63.5936	92.8241	143.649	45.442	90.9466	160.674				92.8241	143.649	236.473		90.9466	160.674	251.621
AT010	2572	GiDREADD	45.567	76.3622	172.817	61.3402	119.05	119.426				76.3622	172.817	249.179		119.05	119.426	238.476
AT010	2580	GiDREADD	49.7601	124.744	125.496	53.7664	88.5675	156.855				124.744	125.496	250.24		88.5675	156.855	245.422
														248.315				249.369
AT007	2380	tdTomato	44.9454	123.193	127.888	45.3949	104.314	140.881
AT007	2382	tdTomato	23.5995	97.8408	144.038	57.6455	71.0398	170.057
AT007	2377	tdTomato	43.6252	104.024	144.457	40.448	22.7911	235.049
AT007	2385	tdTomato	31.1696	103.148	151.842	33.36	138.572	110.407
AT007	2381	tdTomato	36.2533	96.9885	136.185	49.7655	120.94	125.447
AT010	2577	tdTomato	48.5717	152.851	98.6456	25.2869	59.3366	214.125
AT010	2579	tdTomato	55.5816	76.2369	163.615	75.7981	120.551	103.714
AT010	2578	tdTomato	33.0483	106.781	159.107	45.0665	82.5594	171.503
			39.9393	103.586	144.248	45.2307	93.4367	155.469
AT007	2386	GiDREADD	53.9596	123.381	112.865	31.4241	121.502	141.847
