# Supplementary material for: Endopiriform neurons projecting to ventral CA1 are a critical node for recognition memory
Source: eLife. 2025 Jan 21;13:RP99642. doi: 10.7554/eLife.99642 (PMC11750136; doi:10.7554/eLife.99642)
Supplement: Figure 8—source data 2. [file elife-99642-fig8-data2.xlsx]

## Sheet: cellinfo
			control			CNO
experimental date	mouse ID	cellID	Rs	Ri	Cm	Rs	Ri	Cm
20221226	AT297_M	AT0477	17	72	102	21	68	69
		AT0478	20	142	58	19	83	51
		AT0479	27	201	93	40	158	104	*high Rs no analysis
		NY0419	22	211	74	12	142	46
20230109	AT295_M	AT0481	37	120	36	21	114	28	*high Rs no analysis
		AT0482	21	174	128	28	79	82
		NY0422	22	295	44	25	253	35
		NY0424	22	146	143	39	176	153	*high Rs no analysis

## Sheet: IO
			control											CNO
experimental date	mouse ID	cellID	number of AP	-100	-50	0	50	100	150	200	250	300	350	number of AP	-100	-50	0	50	100	150	200	250	300	350
20221226	AT297	AT0477	sweep1	0	0	0	1	6	10	12	14	15	8	sweep1	0	0	0	1	5	9	11	14	16	17
			sweep2	0	0	0	2	6	9	12	13	15	7	sweep2	0	0	0	1	4	8	11	14	16	18
			sweep3	0	0	0	2	7	10	12	14	14	9	sweep3	0	0	0	1	5	9	12	14	15	17
			sweep4	0	0	0	1	7	10	12	14	15	9	sweep4	0	0	0	0	2	8	10	13	16	18
			sweep5	0	0	0	4	9	11	12	13	14	7	sweep5	0	0	0	1	4	7	10	13	15	18
				0	0	0	1.66667	6.33333	9.66667	12	13.6667	14.6667	8		0	0	0	0.8	4	8.2	10.8	13.6	15.6	17.6
		AT0478	sweep1	0	0	0	0	0	1	4	7	11	14	sweep1	0	0	0	0	0	0	0	0	2	6
			sweep2	0	0	0	0	0	0	4	7	11	14	sweep2	0	0	0	0	0	0	0	0	2	6
			sweep3	0	0	0	0	0	1	4	7	10	13	sweep3	0	0	0	0	0	0	0	0	2	6
			sweep4	0	0	0	0	0	0	3	7	10	13	sweep4	0	0	0	0	0	0	0	0	2	5
			sweep5	0	0	0	0	0	1	4	7	11	14	sweep5	0	0	0	0	0	0	0	0	1	5
				0	0	0	0	0	0.6	3.8	7	10.6	13.6		0	0	0	0	0	0	0	0	1.8	5.6
		NY0419	sweep1	0	0	0	2	5	8	13	17	18	13	sweep1	0	0	0	5	9	12	15	7	2	2
			sweep2	0	0	0	2	5	8	12	15	17	16	sweep2	0	0	0	5	9	12	15	7	2	2
			sweep3	0	0	0	2	5	8	11	14	16	14	sweep3	0	0	0	3	8	12	8	2	1	1
				0	0	0	2	5	8	12	15.3333	17	14.3333		0	0	0	4.33333	8.66667	12	12.6667	5.33333	1.66667	1.66667
20230109	AT295	AT0482	sweep1	0	0	0	0	0	1	3	5	7	9	sweep1	0	0	0	0	0	0	0	0	0	0
			sweep2	0	0	0	0	0	1	3	4	6	8	sweep2	0	0	0	0	0	0	0	0	0	0
			sweep3	0	0	0	0	0	0	3	4	6	8	sweep3	0	0	0	0	0	0	0	0	0	0
			sweep4	0	0	0	0	0	0	2	4	5	7	sweep4	0	0	0	0	0	0	0	0	0	0
			sweep5	0	0	0	0	0	0	2	4	5	7	sweep5	0	0	0	0	0	0	0	0	0	0
				0	0	0	0	0	0.4	2.6	4.2	5.8	7.8		0	0	0	0	0	0	0	0	0	0
		NY0422	sweep1	0	0	0	0	3	6	10	13	17	20	sweep1	0	0	0	0	0	3	8	11	16	21
			sweep2	0	0	0	0	2	5	9	12	15	19	sweep2	0	0	0	0	0	2	7	11	16	19
			sweep3	0	0	0	0	2	5	8	11	15	18	sweep3	0	0	0	0	0	2	7	11	15	19
				0	0	0	0	2.33333	5.33333	9	12	15.6667	19		0	0	0	0	0	2.33333	7.33333	11	15.6667	19.6667
			AT0477	0	0	0	1.66667	6.33333	9.66667	12	13.6667	14.6667	8		0	0	0	0.8	4	8.2	10.8	13.6	15.6	17.6
			AT0478	0	0	0	0	0	0.6	3.8	7	10.6	13.6		0	0	0	0	0	0	0	0	1.8	5.6
			NY0419	0	0	0	2	5	8	12	15.3333	17	14.3333		0	0	0	4.33333	8.66667	12	12.6667	5.33333	1.66667	1.66667
			AT0482	0	0	0	0	0	0.4	2.6	4.2	5.8	7.8		0	0	0	0	0	0	0	0	0	0
			NY0422	0	0	0	0	2.33333	5.33333	9	12	15.6667	19		0	0	0	0	0	2.33333	7.33333	11	15.6667	19.6667
			median	0	0	0	0	2.33333	5.33333	9	12	14.6667	13.6		0	0	0	0	0	2.33333	7.33333	5.33333	1.8	5.6
							P =1	p =1	p = 0.625	p = 0.125	p = 0.0625	p =0.25	p=0.625
				0	0	0	1.66667	6.33333	9.66667	12	13.6667	14.6667	8
				0	0	0	0	0	0.6	3.8	7	10.6	13.6
				0	0	0	2	5	8	12	15.3333	17	14.3333
				0	0	0	0	0	0.4	2.6	4.2	5.8	7.8
				0	0	0	0	2.33333	5.33333	9	12	15.6667	19
				0	0	0	0	1.16667	2.96667	6.4	9.5	13.1333	13.9667
				0	0	0	0.8	4	8.2	10.8	13.6	15.6	17.6
				0	0	0	0	0	0	0	0	1.8	5.6
				0	0	0	4.33333	8.66667	12	12.6667	5.33333	1.66667	1.66667
				0	0	0	0	0	0	0	0	0	0
				0	0	0	0	0	2.33333	7.33333	11	15.6667	19.6667
				0	0	0	0	0	1.16667	3.66667	2.66667	1.73333	3.63333
				0	0	0	0.113636	0.431818	0.659091	0.818182	0.931818	1	0.545455		0	0	0	0.0454545	0.227273	0.465909	0.613636	0.772727	0.886364	1
				0	0	0	0	0	0.0441176	0.279412	0.514706	0.779412	1		0	0	0	0	0	0	0	0	0.321429	1
				0	0	0	0.117647	0.294118	0.470588	0.705882	0.901961	1	0.843137		0	0	0	0.342105	0.684211	0.947368	1	0.421053	0.131579	0.131579
				0	0	0	0	0	0.0512821	0.333333	0.538462	0.74359	1		0	0	0	0	0	0	0	0	0	0
				0	0	0	0	0.122807	0.280702	0.473684	0.631579	0.824561	1		0	0	0	0	0	0.118644	0.372881	0.559322	0.79661	1
										p =0.4375	p =0.0625	p =0.0625	p =0.5
