# Supplementary material for: Endopiriform neurons projecting to ventral CA1 are a critical node for recognition memory
Source: eLife. 2025 Jan 21;13:RP99642. doi: 10.7554/eLife.99642 (PMC11750136; doi:10.7554/eLife.99642)
Supplement: Figure 8—source data 3. [file elife-99642-fig8-data3.xlsx]

## Sheet: conditioning in A
	Activity state % (Inactive)
cohort	Treatment	expression	Mouse ID	Baseline	Tone	Trace	ITI	Tone2	Trace2	ITI2	Tone3	Trace3	ITI3					0	0	0	0	27.4	10.8889	28.4667	46	33.1111	75.5
AT006	CNO	GiDREADD	2134	1.44444	0	0	5.76667	14	0	10.4	29.6	43.1111	30.9					0	0	0	1.93333	0	5.77778	14.6667	17	0	61.1667
AT006	CNO	GiDREADD	2139	0	0	0	2.13333	0	0	2.76667	7.4	19.7778	21.1667					0	0	0	3.3	17.8	0	9.36667	18	14.8889	25.9667
AT006	CNO	GiDREADD	2130	1.28889	5	18.6667	6.53333	7.8	6.44444	19.6	38.2	54.8889	28.2667					0	0	0	3.33333	5.6	6.44444	12.2	36.2	54.8889	33.3667
AT006	CNO	GiDREADD	2141	0.577778	0	0	0	0	0	25.7333	13.8	27.1111	52.9333					1.26667	0	0	0	7.6	0	1.06667	0	0	28.5333
AT007	CNO	GiDREADD	2386	1.93333	0	0	0	8	0	2.2	39.8	22.8889	16.1333					0	0	0	0	0	14.4444	7	27.6	35.7778	61.2333
AT010	CNO	GiDREADD	2575	0	0	0	0	0	0	0.866667	0	0	21.6					0	0	0	1.03333	0	8.66667	25.1	8.4	0	50.6333
AT010	CNO	GiDREADD	2576	0	0	0	0	0	0	1.83333	14.6	19.1111	13.5333					0	0	0	0	0	0	1.96667	30.2	8.22222	7.03333
AT010	CNO	GiDREADD	2572	0	0	0	0	0	0	0	0	0	3.06667					1.44444	0	0	5.76667	14	0	10.4	29.6	43.1111	30.9
AT010	CNO	GiDREADD	2580	0	0	0	1.76667	5.4	0	13.7	18.6	22	41.7333					0	0	0	2.13333	0	0	2.76667	7.4	19.7778	21.1667
				0	0	0	0	0	0	2.76667	14.6	22	21.6					1.28889	5	18.6667	6.53333	7.8	6.44444	19.6	38.2	54.8889	28.2667
																		0.577778	0	0	0	0	0	25.7333	13.8	27.1111	52.9333
																		1.93333	0	0	0	8	0	2.2	39.8	22.8889	16.1333
				Baseline	Tone	Trace	ITI	Tone2	Trace2	ITI2	Tone3	Trace3	ITI3					0	0	0	0	0	0	0.866667	0	0	21.6
AT006	Saline	GiDREADD	2135	0	0	0	0	27.4	10.8889	28.4667	46	33.1111	75.5					0	0	0	0	0	0	1.83333	14.6	19.1111	13.5333
AT006	Saline	GiDREADD	2131	0	0	0	1.93333	0	5.77778	14.6667	17	0	61.1667					0	0	0	0	0	0	0	0	0	3.06667
AT006	Saline	GiDREADD	2140	0	0	0	3.3	17.8	0	9.36667	18	14.8889	25.9667					0	0	0	1.76667	5.4	0	13.7	18.6	22	41.7333
AT006	Saline	GiDREADD	2133	0	0	0	3.33333	5.6	6.44444	12.2	36.2	54.8889	33.3667
AT007	Saline	GiDREADD	2384	1.26667	0	0	0	7.6	0	1.06667	0	0	28.5333					Source Sum Sq. d.f. Mean Sq. F Prob>F
AT010	Saline	GiDREADD	2574	0	0	0	0	0	14.4444	7	27.6	35.7778	61.2333					---------------------------------------------------------
AT010	Saline	GiDREADD	2573	0	0	0	1.03333	0	8.66667	25.1	8.4	0	50.6333					phase 20605.8 9 2289.54 19.77 0
AT010	Saline	GiDREADD	2569	0	0	0	0	0	0	1.96667	30.2	8.22222	7.03333					drug 291.5 1 291.46 2.52 0.1147
				0	0	0	0.516665	2.8	6.11111	10.7833	22.8	11.5556	42					phase*drug 1444 9 160.44 1.39 0.1994
																		Error 17371 150 115.81
																		Total 39375.9 169
AT007	CNO	tdTomato	2380	0	0	0	3.66667	0	0	6.86667	20.6	0	8.36667
AT007	CNO	tdTomato	2382	0.644444	6.2	0	0	29	20	21.7	36.8	44.2222	37.6667
AT007	CNO	tdTomato	2383	8.42222	24.8	0	4.93333	0	0	17.2	31.8	39.3333	65.1667
AT007	CNO	tdTomato	2385	0	9.8	9.77778	2.86667	0	17.7778	23.9	25.8	5.77778	32.7
AT007	CNO	tdTomato	2377	0.777778	0	0	0	0	0	7.96667	11.2	20.6667	15.4
AT010	CNO	tdTomato	2578	0	0	0	1.1	0	0	1.06667	9.2	0	6.4
AT007	Saline	tdTomato	2381	0	0	5.77778	4.33333	5.6	6.66667	17.9	5.8	10	63.0667
AT007	Saline	tdTomato	2378	0	0	0	0	0	0	2.23333	0	19.1111	3.2
AT007	Saline	tdTomato	2379	5.28889	6	0	2.96667	0	23.1111	29.8333	75.2	71.7778	64.8
AT010	Saline	tdTomato	2577	0	0	0	0	0	0	2.13333	0	0	8.93333
AT010	Saline	tdTomato	2579	0	0	0	1.93333	10.4	5.55556	27.3	7.8	44	22.8667

## Sheet: Test in A
				Distance moved	Velocity	Activity	Activity state
				Center-point	Center-point	Within arena	Inactive
cohort	treatment	expression	mouse ID	Total	Mean	Mean	Cumulative Duration within Nesting
AT006	CNO	GiDREADD	2134	313.451	1.74178	0.137283	41.0222
AT006	CNO	GiDREADD	2139	452.275	2.5132	0.209573	30.1333
AT006	CNO	GiDREADD	2130	334.018	1.85607	0.174165	33.7556
AT006	CNO	GiDREADD	2141	337.659	1.8763	0.160754	29.3778
AT007	CNO	GiDREADD	2386	363.712	2.02107	0.196641	31.5778
AT010	CNO	GiDREADD	2575				7.4
AT010	CNO	GiDREADD	2576				9.71111		Saline vs CNO one-way anova p = 0.5755
AT010	CNO	GiDREADD	2572				42.1111
AT010	CNO	GiDREADD	2580				23.7556
							30.1333
AT006	Saline	GiDREADD	2135	360.433	2.00285	0.123674	58.3556
AT006	Saline	GiDREADD	2131	492.667	2.73765	0.223805	27
AT006	Saline	GiDREADD	2140	755.688	4.1992	0.392211	14.8
AT006	Saline	GiDREADD	2133	648.123	3.60148	0.349198	14.9111
AT007	Saline	GiDREADD	2384	626.418	3.48087	0.390345	8.11111
AT010	Saline	GiDREADD	2574				32.5778
AT010	Saline	GiDREADD	2573				26.4444
AT010	Saline	GiDREADD	2569				6.55556
							14.9111
AT007	CNO	tdTomato	2380	937.677	5.21047	0.541709	1.22222
AT007	CNO	tdTomato	2382	493.522	2.7424	0.279782	20.3111
AT007	CNO	tdTomato	2383	593.208	3.29633	0.328507	10.7333
AT007	CNO	tdTomato	2385	776.237	4.31339	0.437814	2.2
AT007	CNO	tdTomato	2377	238.402	1.32475	0.162172	35.3333
AT010	CNO	tdTomato	2578				27.7111
AT007	Saline	tdTomato	2381	457.884	2.54436	0.268289	24.8444
AT007	Saline	tdTomato	2378	1042.56	5.79328	0.566605	3.31111
AT007	Saline	tdTomato	2379	294.025	1.63384	0.199457	26.6
AT010	Saline	tdTomato	2577				13.4667
AT010	Saline	tdTomato	2579				41.6

## Sheet: Test in B
cohort	Treatment	expression	Mouse ID	Baseline	Tone	Trace	ITI	Tone2	Trace2	ITI2	Tone3	Trace3	ITI3
AT006	CNO	GiDREADD	2134	17.9111	24.2	61.7778	32.9	38.6	0	33.5	24.4	7.11111	25				20.7778	48	5.77778	4.3	26.2	44.8889	39.8	47.4	47.1111	26.0333
AT006	CNO	GiDREADD	2139	12.8	55.8	54	9.73333	0	6	8.33333	41.4	62.2222	19.7667				27.0667	80.6	70	28.1333	87.8	73.1111	42.4667	66.8	83.3333	18.3333
AT006	CNO	GiDREADD	2130	22.4667	59.4	72.8889	28.4	59.2	70.6667	31.3667	57.2	55.7778	24.7333				9.6	50.2	63.7778	7.76667	34.4	39.3333	19.2667	34.6	58.8889	39.6
AT006	CNO	GiDREADD	2141	18.2889	59.8	17.3333	6.33333	63.2	52.2222	38.4667	71.4	58	22.3333				11.0222	44.6	34.4444	27.6667	65.8	32	14.6667	11.2	10.2222	13.2667
AT007	CNO	GiDREADD	2386	21.0222	28.6	43.1111	22.7333	6.6	32.6667	14.5	46	7.77778	3.93333				0	5.4	5.55556	6.96667	5.4	33.7778	3.46667	5.2	5.77778	5.56667
AT010	CNO	GiDREADD	2575	13.9778	64.4	61.1111	18.7	41.6	0	13.5	29.6	54.6667	12.8				30.4222	56.2	70.4444	55.9333	43.8	50.4444	32.8333	69.2	57.7778	32.0333
AT010	CNO	GiDREADD	2576	8.33333	52.4	37.1111	18.2333	50.2	59.1111	23.2667	63.4	74.8889	64.8667				16.7556	51.6	65.1111	33.9333	54.2	54.2222	16.8667	63.6	27.5556	24.9
AT010	CNO	GiDREADD	2572	5.82222	61.2	21.5556	2.13333	21.8	44.2222	13.3333	6.4	56.8889	3.9				5.8	15.4	38	7.46667	45.6	37.7778	2.43333	14.2	0	5.1
AT010	CNO	GiDREADD	2580	5.04444	46	14.8889	10.7333	58.8	0	6.03333	32.4	0	0.866667				17.9111	24.2	61.7778	32.9	38.6	0	33.5	24.4	7.11111	25
				13.9778	55.8	43.1111	18.2333	41.6	32.6667	14.5	41.4	55.7778	19.7667				12.8	55.8	54	9.73333	0	6	8.33333	41.4	62.2222	19.7667
																	22.4667	59.4	72.8889	28.4	59.2	70.6667	31.3667	57.2	55.7778	24.7333
																	18.2889	59.8	17.3333	6.33333	63.2	52.2222	38.4667	71.4	58	22.3333
AT006	Saline	GiDREADD	2135	20.7778	48	5.77778	4.3	26.2	44.8889	39.8	47.4	47.1111	26.0333				21.0222	28.6	43.1111	22.7333	6.6	32.6667	14.5	46	7.77778	3.93333
AT006	Saline	GiDREADD	2131	27.0667	80.6	70	28.1333	87.8	73.1111	42.4667	66.8	83.3333	18.3333				13.9778	64.4	61.1111	18.7	41.6	0	13.5	29.6	54.6667	12.8
AT006	Saline	GiDREADD	2140	9.6	50.2	63.7778	7.76667	34.4	39.3333	19.2667	34.6	58.8889	39.6				8.33333	52.4	37.1111	18.2333	50.2	59.1111	23.2667	63.4	74.8889	64.8667
AT006	Saline	GiDREADD	2133	11.0222	44.6	34.4444	27.6667	65.8	32	14.6667	11.2	10.2222	13.2667				5.82222	61.2	21.5556	2.13333	21.8	44.2222	13.3333	6.4	56.8889	3.9
AT007	Saline	GiDREADD	2384	0	5.4	5.55556	6.96667	5.4	33.7778	3.46667	5.2	5.77778	5.56667				5.04444	46	14.8889	10.7333	58.8	0	6.03333	32.4	0	0.866667
AT010	Saline	GiDREADD	2574	30.4222	56.2	70.4444	55.9333	43.8	50.4444	32.8333	69.2	57.7778	32.0333
AT010	Saline	GiDREADD	2573	16.7556	51.6	65.1111	33.9333	54.2	54.2222	16.8667	63.6	27.5556	24.9
AT010	Saline	GiDREADD	2569	5.8	15.4	38	7.46667	45.6	37.7778	2.43333	14.2	0	5.1
				13.8889	49.1	50.8889	17.7167	44.7	42.1111	18.0667	41	37.3333	21.6166
AT007	CNO	tdTomato	2380	2.8	19.4	61.1111	3.7	27.6	20.6667	7.7	40.8	15.5556	2.16667
AT007	CNO	tdTomato	2382	0.622222	27.8	40.4444	17.4	43.6	46.6667	6.7	28.8	0	5.5
AT007	CNO	tdTomato	2383	6.57778	69.2	30.8889	15.5333	71.2	36.2222	22.8333	63	15.1111	6.7
AT007	CNO	tdTomato	2385	1.62222	0	13.1111	9.3	36.8	22.6667	6.66667	24.4	5.55556	10.9333
AT007	CNO	tdTomato	2377	5.04444	19.4	0	11.4333	5.4	15.3333	11.6333	41	31.7778	32.8
AT010	CNO	tdTomato	2578	8.44444	37.4	61.7778	9.66667	40.8	14.2222	6.43333	0	33.7778	1.1
AT007	Saline	tdTomato	2381	5.17778	48.2	58.4444	21.7333	41	50.2222	22.5333	54.6	49.5556	18.0667
AT007	Saline	tdTomato	2378	0	25.2	47.5556	4	25	12.8889	0	54.2	6.88889	3.8
AT007	Saline	tdTomato	2379	8.44444	59.2	69.7778	18.5	60.8	48.8889	8.46667	67.4	60.4444	20.8
AT010	Saline	tdTomato	2577	10.1333	53.2	33.1111	16.1333	26.6	20	12	16	8.22222	3.43333
AT010	Saline	tdTomato	2579	5.13333	53	43.5556	16.8667	26.4	44.4444	17.3667	47.6	24.4444	8.03333
