# Supplementary material for: Endopiriform neurons projecting to ventral CA1 are a critical node for recognition memory
Source: eLife. 2025 Jan 21;13:RP99642. doi: 10.7554/eLife.99642 (PMC11750136; doi:10.7554/eLife.99642)
Supplement: Figure 8—source data 4. [file elife-99642-fig8-data4.xlsx]

## Sheet: Analysis
Selection Result	Trial	Arena	mouse ID	familiar object1 / Nose-point Frequency	familiar object2 / Nose-point Frequency	novel novel / Nose-point Frequency	novel fami / Nose-point Frequency	total	novel/total
N_C	Trial 5	Arena 1	2569	0	0	2	2	4	0.5
N_C	Trial 6	Arena 1	2579	0	0	11	3	14	0.785714
N_C	Trial 11	Arena 1	2570	0	0	19	6	25	0.76
N_C	Trial 12	Arena 1	2577	0	0	12	9	21	0.571429
N_C	Trial 17	Arena 1	2573	0	0	2	3	5	0.4
N_C	Trial 18	Arena 1	2574	0	0	4	4	8	0.5
N_C	Trial 19	Arena 2	2571	0	0	10	9	19	0.526316
N_C	Trial 20	Arena 2	2580	0	0	8	8	16	0.5
N_C	Trial 25	Arena 2	2572	0	0	12	15	27	0.444444
N_C	Trial 26	Arena 2	2578	0	0	8	10	18	0.444444
N_C	Trial 31	Arena 2	2576	0	0	10	4	14	0.714286
N_C	Trial 32	Arena 2	2575	0	0	10	11	21	0.47619
N_S	Trial 5	Arena 2	2571	0	0	17	13	30	0.566667
N_S	Trial 6	Arena 2	2580	0	0	7	5	12	0.583333
N_S	Trial 11	Arena 2	2572	0	0	28	16	44	0.636364
N_S	Trial 12	Arena 2	2578	0	0	11	8	19	0.578947
N_S	Trial 17	Arena 2	2576	0	0	1	1	2	0.5
N_S	Trial 18	Arena 2	2575	0	0	15	11	26	0.576923
N_S	Trial 19	Arena 1	2569	0	0	6	3	9	0.666667
N_S	Trial 20	Arena 1	2579	0	0	13	3	16	0.8125
N_S	Trial 25	Arena 1	2570	0	0	14	3	17	0.823529
N_S	Trial 26	Arena 1	2577	0	0	9	3	12	0.75
N_S	Trial 31	Arena 1	2573	0	0	4	6	10	0.4
N_S	Trial 32	Arena 1	2574	0	0	10	5	15	0.666667
			mouse ID	saline	CNO
			2571	0.566667	0.526316		GREADD expression failed
			2580	0.583333	0.5
			2572	0.636364	0.444444
			2578	0.578947	0.444444
			2576	0.5	0.714286
			2575	0.576923	0.47619
			2569	0.666667	0.5
			2579	0.8125	0.785714
			2570	0.823529	0.76
			2577	0.75	0.571429		tdTomato expression
			2573	0.4	0.4
			2574	0.666667	0.5
			GiDREADD					mouse ID	saline	CNO
			mouse ID	saline	CNO			2580	0.583333	0.5
			2580	0.583333	0.5			2572	0.636364	0.444444
			2572	0.636364	0.444444			2575	0.576923	0.47619
			2575	0.576923	0.47619			2569	0.666667	0.5
			2569	0.666667	0.5	0.00252169		2574	0.666667	0.5
			2574	0.666667	0.5
						signrank test p=0.4063			0.636364	0.5
			2573	0.4	0.4	no novel object recognition			0.00252169
			2576	0.5	0.714286	outlier
			tdTomato
			mouse ID	saline	CNO
			2578	0.578947	0.444444
			2579	0.8125	0.785714
			2577	0.75	0.571429
