# Supplementary material for: Endopiriform neurons projecting to ventral CA1 are a critical node for recognition memory
Source: eLife. 2025 Jan 21;13:RP99642. doi: 10.7554/eLife.99642 (PMC11750136; doi:10.7554/eLife.99642)
Supplement: Supplementary file 2. [file elife-99642-supp2.xlsx]

## Sheet: Table S2 related to Fig.S8A
	NaN	0.288478	0.596444	0.865819	0.668025	0.75739	0.558572	0.596858
	NaN	0.00429454	0.365154	0.760617	0.308386	0.89982	0.480338	0.843133
	NaN	0.0337236	0.161321	0.783996	0.366506	0.748945	0.472526	0.391075
	NaN	0.469768	0.833893	0.00874316	0.418076	0.480572	0.603412	0.523273
	NaN	0.266863	0.689468	0.0470595	0.00602456	0.00879874	0.483023	0.440636
	NaN	0.758606	0.987706	0.855823	0.182081	0.204567	0.0327199	0.000369511
	NaN	0.00251495	0.27312	0.96463	0.201806	0.880199	0.872272	0.97487
	NaN	0.282843	0.710085	0.512635	0.705534	0.62562	0.279554	0.0488398
